# Supplementary material for: Characterization of Cancer Stem Cell Characteristics and Development of a Prognostic Stemness Index Cell-Related Signature in Oral Squamous Cell Carcinoma
Source: Hindawi journal article supplement (doi:10.1155/2021/1571421), 2021-11-09
Supplement: f1 [file 1571421.f1.pdf]

Supplementary table 1. Clinical features of OSCC patients in TCGA dataset.

| ID           | futime | fustat | age | gender | grade  | stage     |
|--------------|--------|--------|-----|--------|--------|-----------|
| TCGA-CV-6433 | 641    | 0      | 57  | MALE   | G3     | Stage II  |
| TCGA-BA-A6DE | 440    | 0      | 70  | FEMALE | G2     | Stage II  |
| TCGA-MT-A51X | 242    | 0      | 30  | MALE   | G1     | Stage IVA |
| TCGA-CV-5439 | 546    | 1      | 62  | MALE   | G2     | Stage IVA |
| TCGA-MT-A7BN | 469    | 0      | 74  | MALE   | G3     | Stage IVA |
| TCGA-D6-A4Z9 | 539    | 0      | 59  | MALE   | G2     | Stage IVA |
| TCGA-CR-6471 | 1202   | 1      | 58  | MALE   | G2     | Stage IVA |
| TCGA-BA-5556 | 179    | 0      | 58  | FEMALE | G3     | Stage II  |
| TCGA-CR-7379 | 1036   | 0      | 78  | FEMALE | G2     | Stage IVA |
| TCGA-P3-A6T5 | 882    | 1      | 79  | FEMALE | G2     | Stage IVA |
| TCGA-MZ-A7D7 | 547    | 0      | 51  | MALE   | unknow | Stage IVA |
| TCGA-CN-4725 | 1157   | 0      | 60  | MALE   | G2     | Stage II  |
| TCGA-CQ-7069 | 1274   | 0      | 77  | FEMALE | G2     | Stage II  |
| TCGA-CV-5971 | 701    | 0      | 60  | MALE   | G2     | Stage IVA |
| TCGA-QK-A6IH | 508    | 0      | 65  | FEMALE | G2     | Stage IVB |
| TCGA-CV-A45T | 4856   | 1      | 64  | FEMALE | G3     | unknow    |
| TCGA-CR-6472 | 1050   | 0      | 59  | MALE   | G3     | unknow    |
| TCGA-CR-7401 | 1077   | 0      | 64  | MALE   | G2     | Stage I   |
| TCGA-HD-8634 | 385    | 1      | 51  | FEMALE | G2     | Stage I   |
| TCGA-CQ-A4CB | 893    | 0      | 59  | MALE   | G2     | Stage III |
| TCGA-CN-6995 | 112    | 1      | 78  | MALE   | G2     | Stage IVA |
| TCGA-CV-7435 | 4680   | 1      | 57  | FEMALE | G2     | Stage IVA |
| TCGA-CN-6996 | 530    | 1      | 58  | FEMALE | G2     | Stage IVA |
| TCGA-CQ-A4CE | 785    | 0      | 76  | FEMALE | G2     | Stage II  |
| TCGA-QK-A6II | 284    | 1      | 52  | MALE   | G2     | Stage IVA |
| TCGA-CN-4730 | 817    | 0      | 62  | MALE   | G2     | Stage IVA |
| TCGA-BA-5558 | 1636   | 0      | 65  | MALE   | G1     | unknow    |
| TCGA-CR-7390 | 1508   | 0      | 67  | MALE   | G2     | Stage IVA |
| TCGA-CQ-A4CI | 950    | 0      | 73  | MALE   | G3     | Stage III |
| TCGA-BA-6871 | 63     | 0      | 75  | MALE   | G2     | unknow    |
| TCGA-CX-7086 | 573    | 0      | 53  | MALE   | G2     | Stage III |
| TCGA-CV-5966 | 545    | 1      | 63  | FEMALE | G3     | Stage IVA |
| TCGA-CN-4733 | 1586   | 0      | 61  | MALE   | G3     | Stage III |
| TCGA-CV-A6JU | 110    | 0      | 61  | FEMALE | G2     | Stage IVB |
| TCGA-CV-7236 | 144    | 1      | 77  | FEMALE | G3     | Stage IVA |
| TCGA-CV-7568 | 927    | 1      | 48  | FEMALE | GX     | Stage IVA |
| TCGA-CV-A45U | 1079   | 1      | 59  | MALE   | G1     | Stage IVA |
| TCGA-QK-A6VB | 450    | 0      | 66  | MALE   | G2     | Stage IVA |
| TCGA-WA-A7H4 | 443    | 0      | 69  | MALE   | G3     | Stage II  |
| TCGA-CQ-6223 | 1428   | 0      | 69  | MALE   | G2     | Stage II  |
| TCGA-4P-AA8J | 102    | 0      | 66  | MALE   | G2     | Stage IVA |
| TCGA-UF-A7JS | 680    | 1      | 59  | MALE   | G2     | Stage IVA |
| TCGA-DQ-5630 | 1030   | 0      | 73  | MALE   | G2     | unknow    |
| TCGA-D6-6516 | 773    | 0      | 69  | MALE   | G2     | Stage I   |
| TCGA-CV-5976 | 1478   | 0      | 50  | MALE   | G2     | Stage IVA |
| TCGA-CX-7085 | 321    | 0      | 77  | FEMALE | G2     | Stage I   |
| TCGA-CR-7369 | 1090   | 1      | 59  | MALE   | G2     | Stage IVA |
| TCGA-D6-6823 | 701    | 0      | 50  | MALE   | G2     | Stage II  |
| TCGA-CV-5436 | 584    | 1      | 65  | MALE   | G2     | Stage IVA |
| TCGA-CV-6948 | 1289   | 1      | 79  | FEMALE | G2     | Stage IVB |
| TCGA-P3-A5QE | 1559   | 0      | 49  | MALE   | G2     | Stage III |

|              |      |   |    |        |    |           |
|--------------|------|---|----|--------|----|-----------|
| TCGA-CQ-7068 | 966  | 0 | 80 | FEMALE | G2 | Stage II  |
| TCGA-BB-A5HZ | 827  | 0 | 65 | MALE   | G2 | Stage IVA |
| TCGA-HD-7831 | 361  | 0 | 74 | MALE   | G2 | Stage IVA |
| TCGA-T2-A6WZ | 484  | 1 | 53 | MALE   | G2 | unknow    |
| TCGA-CV-A468 | 464  | 1 | 42 | MALE   | G2 | Stage IVA |
| TCGA-UF-A71E | 1278 | 0 | 63 | MALE   | G3 | Stage IVA |
| TCGA-CR-7386 | 1430 | 0 | 69 | MALE   | G1 | Stage IVA |
| TCGA-UP-A6WW | 518  | 0 | 58 | MALE   | G2 | unknow    |
| TCGA-UF-A719 | 1663 | 0 | 54 | MALE   | G1 | Stage II  |
| TCGA-DQ-7592 | 516  | 0 | 57 | MALE   | G2 | unknow    |
| TCGA-CR-7395 | 930  | 0 | 80 | FEMALE | G2 | Stage II  |
| TCGA-CV-7100 | 274  | 1 | 66 | MALE   | G3 | Stage III |
| TCGA-CV-6951 | 915  | 1 | 57 | MALE   | G2 | Stage IVA |
| TCGA-CN-A6V6 | 234  | 0 | 59 | MALE   | GX | Stage IVA |
| TCGA-CQ-5326 | 89   | 1 | 67 | MALE   | G3 | Stage IVA |
| TCGA-CQ-5334 | 129  | 1 | 87 | MALE   | G2 | Stage IVA |
| TCGA-CV-5973 | 2641 | 0 | 62 | FEMALE | G3 | Stage III |
| TCGA-CV-7253 | 361  | 1 | 58 | MALE   | G2 | Stage IVA |
| TCGA-CV-7254 | 1459 | 1 | 55 | MALE   | G3 | Stage II  |
| TCGA-CR-7373 | 889  | 0 | 66 | MALE   | G2 | Stage IVA |
| TCGA-CQ-7063 | 1750 | 0 | 59 | FEMALE | G1 | Stage I   |
| TCGA-D6-A6EN | 439  | 0 | 71 | MALE   | G3 | Stage III |
| TCGA-CV-A45O | 851  | 0 | 57 | MALE   | G2 | unknow    |
| TCGA-F7-A61S | 576  | 0 | 62 | MALE   | G1 | Stage III |
| TCGA-CV-A45P | 639  | 0 | 82 | FEMALE | G2 | Stage I   |
| TCGA-CN-4742 | 397  | 1 | 48 | FEMALE | G3 | Stage IVA |
| TCGA-KU-A6H8 | 327  | 1 | 41 | MALE   | G3 | Stage IVA |
| TCGA-RS-A6TO | 387  | 1 | 82 | FEMALE | G2 | Stage IVA |
| TCGA-CN-5364 | 493  | 1 | 55 | MALE   | G2 | Stage IVA |
| TCGA-CQ-A4CG | 430  | 1 | 78 | FEMALE | G2 | Stage III |
| TCGA-CV-7102 | 56   | 1 | 76 | FEMALE | G3 | Stage IVA |
| TCGA-CV-A463 | 23   | 1 | 82 | FEMALE | G2 | Stage IVA |
| TCGA-CN-A642 | 82   | 1 | 57 | MALE   | G3 | Stage IVB |
| TCGA-BA-5152 | 846  | 0 | 56 | MALE   | G2 | Stage IVA |
| TCGA-CV-A45V | 32   | 1 | 87 | FEMALE | G1 | Stage IVA |
| TCGA-QK-AA3K | 253  | 0 | 60 | MALE   | G2 | Stage IVA |
| TCGA-H7-7774 | 407  | 0 | 75 | FEMALE | G2 | Stage IVA |
| TCGA-CR-5250 | 799  | 0 | 71 | MALE   | G3 | unknow    |
| TCGA-QK-A8Z9 | 352  | 0 | 56 | MALE   | G2 | Stage IVA |
| TCGA-F7-A620 | 543  | 0 | 47 | MALE   | G1 | Stage III |
| TCGA-CR-7367 | 1440 | 0 | 52 | MALE   | G1 | Stage IVA |
| TCGA-CV-7413 | 294  | 1 | 74 | FEMALE | G2 | Stage II  |
| TCGA-CN-4741 | 1268 | 0 | 75 | MALE   | G2 | Stage IVA |
| TCGA-T2-A6X2 | 987  | 0 | 82 | MALE   | G1 | Stage III |
| TCGA-CV-6952 | 185  | 1 | 65 | FEMALE | G1 | Stage IVA |
| TCGA-CN-A6UY | 307  | 0 | 57 | MALE   | G2 | Stage IVA |
| TCGA-CQ-5324 | 1593 | 0 | 59 | MALE   | G2 | Stage III |
| TCGA-CQ-7071 | 877  | 0 | 76 | FEMALE | G2 | Stage III |
| TCGA-C9-A480 | 386  | 0 | 45 | FEMALE | G1 | Stage III |
| TCGA-CV-A6JN | 906  | 0 | 53 | MALE   | G1 | unknow    |
| TCGA-UF-A71B | 1319 | 0 | 50 | MALE   | G2 | Stage IVA |
| TCGA-CV-6942 | 4282 | 0 | 73 | FEMALE | G3 | Stage II  |
| TCGA-IQ-A6SH | 471  | 0 | 55 | MALE   | G1 | Stage III |

|              |      |   |    |        |    |           |
|--------------|------|---|----|--------|----|-----------|
| TCGA-CR-6477 | 514  | 0 | 56 | FEMALE | G2 | unknow    |
| TCGA-CN-4728 | 1151 | 0 | 56 | MALE   | G2 | Stage IVA |
| TCGA-CN-A63V | 484  | 0 | 59 | MALE   | G2 | Stage IVA |
| TCGA-IQ-7631 | 1172 | 0 | 60 | FEMALE | G1 | Stage II  |
| TCGA-CQ-A4C9 | 707  | 0 | 56 | MALE   | G2 | Stage III |
| TCGA-BA-5151 | 190  | 0 | 72 | MALE   | G1 | Stage IVA |
| TCGA-CQ-6219 | 479  | 1 | 50 | FEMALE | G2 | Stage IVA |
| TCGA-CR-6488 | 379  | 0 | 68 | FEMALE | G2 | Stage II  |
| TCGA-CR-7377 | 279  | 1 | 58 | MALE   | G3 | Stage IVA |
| TCGA-HD-8224 | 446  | 1 | 63 | MALE   | G3 | Stage IVA |
| TCGA-CQ-5333 | 341  | 1 | 74 | MALE   | G3 | Stage II  |
| TCGA-D6-8569 | 770  | 0 | 52 | MALE   | G2 | Stage II  |
| TCGA-MZ-A6I9 | 489  | 1 | 68 | MALE   | G2 | unknow    |
| TCGA-C9-A47Z | 191  | 1 | 72 | FEMALE | G1 | Stage III |
| TCGA-F7-A61V | 384  | 0 | 54 | MALE   | G1 | Stage II  |
| TCGA-HD-A633 | 421  | 0 | 74 | MALE   | G2 | Stage IVA |
| TCGA-F7-8489 | 658  | 0 | 48 | MALE   | G1 | Stage II  |
| TCGA-F7-A61W | 14   | 0 | 51 | MALE   | G2 | Stage IVA |
| TCGA-CV-A465 | 215  | 1 | 24 | MALE   | G1 | Stage III |
| TCGA-CQ-6228 | 456  | 1 | 71 | FEMALE | G2 | Stage IVA |
| TCGA-CQ-6222 | 1407 | 0 | 63 | MALE   | G2 | Stage IVA |
| TCGA-QK-A64Z | 641  | 1 | 79 | FEMALE | G1 | Stage IVA |
| TCGA-IQ-A61J | 1021 | 0 | 54 | MALE   | G1 | Stage IVA |
| TCGA-CV-6954 | 2002 | 1 | 59 | MALE   | G2 | Stage IVA |
| TCGA-CN-6019 | 432  | 0 | 61 | MALE   | G2 | Stage IVA |
| TCGA-P3-A5QA | 1726 | 0 | 41 | MALE   | G3 | Stage I   |
| TCGA-CV-7446 | 1093 | 1 | 66 | MALE   | G2 | Stage IVA |
| TCGA-CR-7393 | 993  | 0 | 26 | MALE   | G2 | Stage III |
| TCGA-CN-6017 | 629  | 0 | 55 | MALE   | G2 | Stage IVA |
| TCGA-P3-A6T0 | 578  | 0 | 47 | FEMALE | G2 | Stage IVA |
| TCGA-DQ-5625 | 1133 | 1 | 52 | FEMALE | G2 | unknow    |
| TCGA-CQ-6227 | 129  | 1 | 77 | MALE   | G2 | Stage IVA |
| TCGA-P3-A6T3 | 577  | 1 | 49 | MALE   | G2 | Stage IVA |
| TCGA-CQ-7065 | 1335 | 0 | 40 | MALE   | G2 | Stage II  |
| TCGA-CN-4731 | 993  | 0 | 63 | FEMALE | G3 | Stage IVA |
| TCGA-CV-A6K0 | 606  | 0 | 58 | MALE   | G3 | Stage I   |
| TCGA-CQ-A4CD | 998  | 0 | 69 | MALE   | G3 | Stage IVA |
| TCGA-CN-5359 | 377  | 1 | 59 | MALE   | G2 | Stage IVA |
| TCGA-CQ-6218 | 1253 | 0 | 52 | FEMALE | G2 | Stage IVA |
| TCGA-UF-A71A | 86   | 1 | 67 | MALE   | G1 | Stage IVA |
| TCGA-CV-A6K2 | 317  | 1 | 79 | MALE   | G1 | Stage IVA |
| TCGA-T2-A6WX | 209  | 1 | 73 | FEMALE | G1 | unknow    |
| TCGA-CQ-6225 | 403  | 1 | 65 | MALE   | G2 | Stage III |
| TCGA-P3-A6T7 | 487  | 1 | 55 | MALE   | G2 | Stage IVA |
| TCGA-CX-A4AQ | 1555 | 0 | 56 | MALE   | G3 | Stage IVA |
| TCGA-CV-6940 | 804  | 1 | 80 | FEMALE | G2 | Stage III |
| TCGA-CR-7376 | 972  | 0 | 83 | MALE   | G2 | Stage III |
| TCGA-CV-6950 | 459  | 1 | 64 | MALE   | G2 | Stage IVA |
| TCGA-CQ-A4C7 | 353  | 1 | 88 | MALE   | G3 | Stage III |
| TCGA-MT-A67A | 914  | 0 | 85 | FEMALE | G2 | Stage I   |
| TCGA-CN-4729 | 392  | 0 | 73 | MALE   | G2 | Stage III |
| TCGA-CV-7099 | 243  | 1 | 85 | FEMALE | G2 | Stage II  |
| TCGA-CV-A45R | 5480 | 0 | 46 | MALE   | G1 | Stage III |

|              |      |   |    |        |        |           |
|--------------|------|---|----|--------|--------|-----------|
| TCGA-CN-4740 | 811  | 0 | 79 | FEMALE | G2     | Stage IVA |
| TCGA-CX-7082 | 11   | 1 | 82 | MALE   | G2     | Stage IVA |
| TCGA-CR-7397 | 754  | 0 | 44 | MALE   | G2     | Stage IVA |
| TCGA-QK-A6IG | 222  | 1 | 69 | MALE   | G2     | Stage III |
| TCGA-CV-6441 | 292  | 1 | 60 | MALE   | G3     | Stage III |
| TCGA-CQ-6224 | 1350 | 0 | 52 | MALE   | G3     | Stage IVA |
| TCGA-CV-5970 | 406  | 1 | 59 | MALE   | G2     | Stage IVA |
| TCGA-CV-7180 | 327  | 1 | 34 | MALE   | G2     | Stage II  |
| TCGA-BA-A6DJ | 407  | 1 | 62 | MALE   | G2     | Stage IVA |
| TCGA-BA-6873 | 122  | 0 | 28 | MALE   | G2     | Stage IVA |
| TCGA-UF-A7JA | 1894 | 0 | 66 | FEMALE | G2     | Stage IVA |
| TCGA-CV-A6JO | 197  | 1 | 69 | MALE   | G2     | Stage IVA |
| TCGA-CV-A6JE | 1075 | 0 | 78 | MALE   | G2     | unknow    |
| TCGA-CN-6998 | 46   | 0 | 53 | MALE   | G2     | Stage IVA |
| TCGA-BA-A6D8 | 850  | 0 | 59 | MALE   | G2     | Stage IVA |
| TCGA-CX-7219 | 1045 | 0 | 47 | MALE   | G2     | Stage IVA |
| TCGA-D6-A6EM | 232  | 0 | 65 | FEMALE | G2     | Stage III |
| TCGA-DQ-7588 | 427  | 1 | 66 | MALE   | G3     | unknow    |
| TCGA-CR-7391 | 913  | 0 | 36 | FEMALE | G1     | Stage I   |
| TCGA-QK-A8Z7 | 198  | 0 | 59 | MALE   | unknow | Stage IVA |
| TCGA-CV-7414 | 14   | 1 | 78 | MALE   | G2     | Stage IVA |
| TCGA-BA-5557 | 242  | 0 | 41 | FEMALE | G2     | Stage III |
| TCGA-CN-6018 | 580  | 1 | 85 | FEMALE | G2     | Stage IVA |
| TCGA-CR-6492 | 479  | 0 | 78 | MALE   | G3     | Stage III |
| TCGA-CQ-6221 | 1000 | 0 | 79 | MALE   | G3     | unknow    |
| TCGA-F7-A624 | 378  | 0 | 73 | MALE   | G3     | Stage II  |
| TCGA-CV-A464 | 1722 | 0 | 48 | MALE   | G2     | Stage III |
| TCGA-UF-A7JD | 735  | 0 | 71 | MALE   | G3     | Stage IVA |
| TCGA-DQ-5624 | 1778 | 0 | 43 | FEMALE | G2     | unknow    |
| TCGA-CN-A498 | 443  | 0 | 61 | FEMALE | G1     | Stage III |
| TCGA-HL-7533 | 1057 | 0 | 65 | MALE   | G3     | unknow    |
| TCGA-CR-6493 | 282  | 1 | 69 | MALE   | G2     | Stage IVA |
| TCGA-CR-6491 | 693  | 0 | 60 | MALE   | G2     | Stage IVA |
| TCGA-CV-A45X | 198  | 1 | 47 | MALE   | G2     | Stage IVA |
| TCGA-CN-4736 | 395  | 1 | 70 | FEMALE | G2     | unknow    |
| TCGA-CQ-A4C6 | 1353 | 0 | 63 | MALE   | G2     | Stage II  |
| TCGA-CQ-7072 | 1950 | 0 | 51 | MALE   | G3     | Stage II  |
| TCGA-D6-6827 | 568  | 0 | 55 | FEMALE | G3     | Stage I   |
| TCGA-IQ-A61E | 1147 | 0 | 55 | FEMALE | G2     | Stage III |
| TCGA-BA-A6DG | 69   | 1 | 49 | MALE   | G2     | unknow    |
| TCGA-QK-A6IJ | 387  | 0 | 71 | MALE   | G3     | Stage III |
| TCGA-CV-A6JT | 852  | 0 | 65 | MALE   | G2     | Stage II  |
| TCGA-CQ-A4CH | 371  | 0 | 58 | MALE   | G2     | Stage II  |
| TCGA-CV-A45Q | 5152 | 1 | 69 | FEMALE | G1     | unknow    |
| TCGA-BA-A6DB | 216  | 0 | 24 | FEMALE | G1     | Stage I   |
| TCGA-CN-6013 | 628  | 0 | 56 | MALE   | G3     | Stage IVA |
| TCGA-CR-7372 | 759  | 0 | 45 | MALE   | G1     | Stage I   |
| TCGA-CQ-5327 | 1660 | 0 | 61 | FEMALE | G2     | Stage IVA |
| TCGA-D6-6825 | 491  | 0 | 73 | MALE   | G2     | Stage I   |
| TCGA-BA-6872 | 384  | 1 | 47 | MALE   | G2     | unknow    |
| TCGA-HD-8314 | 670  | 0 | 58 | MALE   | G4     | Stage III |
| TCGA-CQ-5330 | 1393 | 0 | 69 | FEMALE | G3     | Stage IVA |
| TCGA-QK-A652 | 357  | 0 | 60 | MALE   | G2     | Stage III |

|              |      |   |    |        |    |           |
|--------------|------|---|----|--------|----|-----------|
| TCGA-BB-8601 | 624  | 0 | 84 | MALE   | G2 | Stage III |
| TCGA-CN-4737 | 625  | 0 | 19 | MALE   | G2 | Stage IVA |
| TCGA-P3-A6T6 | 395  | 1 | 53 | MALE   | G3 | Stage IVA |
| TCGA-CV-6436 | 1899 | 0 | 62 | MALE   | G1 | Stage IVA |
| TCGA-BA-7269 | 1273 | 0 | 61 | MALE   | G1 | Stage III |
| TCGA-CN-5373 | 1584 | 0 | 55 | FEMALE | G1 | Stage I   |
| TCGA-D6-A4ZB | 376  | 0 | 61 | MALE   | G2 | Stage III |
| TCGA-CN-6011 | 933  | 0 | 57 | MALE   | G3 | Stage IVA |
| TCGA-BB-A5HU | 782  | 0 | 47 | MALE   | G2 | Stage IVA |
| TCGA-CV-7263 | 560  | 1 | 64 | MALE   | G1 | Stage II  |
| TCGA-MT-A67D | 56   | 0 | 55 | MALE   | G2 | Stage II  |
| TCGA-D6-A6EO | 435  | 0 | 44 | MALE   | G2 | Stage IVA |
| TCGA-CR-7382 | 796  | 0 | 49 | MALE   | G2 | Stage IVA |
| TCGA-CV-7407 | 1081 | 1 | 67 | FEMALE | G2 | Stage II  |
| TCGA-DQ-5631 | 548  | 1 | 52 | MALE   | G3 | unknow    |
| TCGA-CN-5369 | 1    | 1 | 90 | FEMALE | G3 | Stage IVA |
| TCGA-BA-A6DD | 173  | 1 | 44 | MALE   | G2 | Stage IVA |
| TCGA-CV-6955 | 334  | 1 | 74 | FEMALE | G3 | Stage II  |
| TCGA-IQ-A61G | 360  | 0 | 57 | MALE   | G2 | Stage IVA |
| TCGA-DQ-7591 | 622  | 0 | 62 | MALE   | G4 | unknow    |
| TCGA-CV-A6JY | 646  | 0 | 69 | MALE   | G1 | Stage IVA |
| TCGA-CQ-6229 | 1179 | 0 | 61 | MALE   | G2 | Stage II  |
| TCGA-CQ-6220 | 985  | 1 | 69 | MALE   | G2 | Stage III |
| TCGA-CV-7411 | 2717 | 1 | 64 | FEMALE | G1 | Stage IVA |
| TCGA-CR-7394 | 1346 | 0 | 70 | MALE   | G2 | Stage IVA |
| TCGA-CN-A49A | 391  | 0 | 60 | MALE   | G2 | Stage IVB |
| TCGA-P3-A6T8 | 400  | 0 | 54 | MALE   | G3 | Stage IVA |
| TCGA-IQ-A61H | 1138 | 0 | 76 | MALE   | G2 | Stage II  |
| TCGA-CQ-5329 | 1422 | 0 | 46 | FEMALE | G2 | Stage II  |
| TCGA-D6-6515 | 403  | 1 | 82 | FEMALE | G3 | Stage II  |
| TCGA-CN-6994 | 735  | 0 | 67 | MALE   | G2 | Stage IVA |
| TCGA-CR-7380 | 606  | 1 | 58 | MALE   | G2 | Stage IVB |
| TCGA-UF-A7JO | 631  | 1 | 79 | FEMALE | G2 | Stage IVA |
| TCGA-CV-7095 | 572  | 1 | 87 | FEMALE | G2 | Stage II  |
| TCGA-CV-A6JZ | 714  | 0 | 68 | MALE   | G2 | Stage II  |
| TCGA-CV-7090 | 5252 | 0 | 39 | MALE   | G2 | Stage II  |
| TCGA-CR-6484 | 354  | 0 | 67 | FEMALE | G2 | Stage IVA |
| TCGA-CN-6020 | 205  | 1 | 58 | MALE   | G2 | Stage III |
| TCGA-CV-6945 | 366  | 1 | 41 | MALE   | G2 | Stage IVA |
| TCGA-BA-4077 | 1134 | 1 | 45 | FEMALE | G2 | Stage IVA |
| TCGA-CQ-5331 | 1399 | 0 | 73 | FEMALE | G2 | unknow    |
| TCGA-CN-5358 | 261  | 1 | 60 | MALE   | G2 | Stage II  |
| TCGA-BA-A4IG | 855  | 0 | 77 | MALE   | G3 | unknow    |
| TCGA-KU-A66T | 552  | 0 | 53 | FEMALE | G2 | Stage IVA |
| TCGA-P3-A5QF | 330  | 1 | 49 | MALE   | G2 | Stage IVA |
| TCGA-T3-A92N | 95   | 1 | 79 | MALE   | G3 | Stage IVA |
| TCGA-HD-7832 | 350  | 0 | 52 | MALE   | G2 | Stage IVA |
| TCGA-P3-A6T2 | 2165 | 0 | 45 | MALE   | G2 | Stage IVA |
| TCGA-IQ-7632 | 441  | 0 | 68 | FEMALE | G1 | Stage IVA |
| TCGA-F7-A50G | 616  | 0 | 66 | MALE   | G1 | Stage III |
| TCGA-CR-7392 | 1425 | 0 | 67 | FEMALE | G1 | Stage IVA |
| TCGA-CQ-5323 | 1466 | 0 | 82 | MALE   | G2 | Stage I   |
| TCGA-CV-6953 | 1641 | 1 | 80 | FEMALE | G1 | Stage III |

|              |      |   |    |        |    |           |
|--------------|------|---|----|--------|----|-----------|
| TCGA-P3-A6T4 | 62   | 1 | 54 | MALE   | G2 | Stage IVA |
| TCGA-CV-6003 | 1665 | 0 | 50 | FEMALE | G2 | Stage III |
| TCGA-CV-5979 | 1315 | 0 | 26 | MALE   | G2 | Stage IVA |
| TCGA-BB-4224 | 278  | 0 | 52 | MALE   | G2 | Stage IVA |
| TCGA-CV-6941 | 342  | 1 | 51 | MALE   | G2 | Stage III |
| TCGA-CN-6024 | 224  | 0 | 66 | MALE   | G2 | Stage IVA |
| TCGA-CN-6016 | 594  | 0 | 64 | MALE   | G2 | Stage IVA |
| TCGA-BB-A6UO | 268  | 1 | 61 | FEMALE | G2 | Stage IVA |
| TCGA-CR-7368 | 1245 | 0 | 54 | MALE   | G2 | Stage IVA |
| TCGA-CQ-5325 | 654  | 1 | 65 | MALE   | G2 | Stage I   |
| TCGA-BB-4225 | 146  | 0 | 73 | MALE   | G3 | unknow    |
| TCGA-CV-A6JD | 182  | 1 | 82 | FEMALE | G3 | unknow    |
| TCGA-CV-7428 | 1671 | 1 | 47 | MALE   | G2 | Stage IVA |
| TCGA-CV-7429 | 107  | 1 | 55 | MALE   | G3 | Stage IVA |
| TCGA-CV-7427 | 4760 | 1 | 73 | FEMALE | G1 | Stage II  |
| TCGA-UF-A7JT | 993  | 1 | 72 | FEMALE | G3 | Stage IVA |
| TCGA-MT-A67F | 384  | 0 | 60 | FEMALE | G2 | Stage IVA |
| TCGA-CR-7365 | 1191 | 0 | 60 | MALE   | G2 | Stage IVA |
| TCGA-F7-A50J | 585  | 0 | 67 | FEMALE | G2 | Stage III |
| TCGA-CN-5370 | 259  | 1 | 78 | MALE   | G3 | Stage III |
| TCGA-CV-7104 | 393  | 1 | 61 | FEMALE | G2 | Stage IVA |
| TCGA-HD-A4C1 | 11   | 0 | 41 | FEMALE | G1 | Stage IVA |
| TCGA-UF-A7JC | 546  | 1 | 42 | MALE   | G1 | Stage IVA |
| TCGA-CN-5367 | 352  | 1 | 60 | FEMALE | G2 | Stage IVA |
| TCGA-BA-4074 | 462  | 1 | 69 | MALE   | G3 | Stage IVA |
| TCGA-BB-4228 | 558  | 0 | 50 | MALE   | GX | Stage III |
| TCGA-H7-8502 | 458  | 0 | 50 | MALE   | G2 | Stage IVA |
| TCGA-CN-4726 | 142  | 1 | 68 | MALE   | G2 | Stage IVA |
| TCGA-CV-5442 | 2327 | 0 | 76 | FEMALE | G3 | Stage IVA |
| TCGA-CV-5977 | 1840 | 0 | 66 | MALE   | G2 | Stage IVA |
| TCGA-CV-6937 | 624  | 1 | 71 | MALE   | G2 | Stage II  |
| TCGA-CQ-5332 | 317  | 1 | 87 | MALE   | G2 | Stage III |
| TCGA-H7-8501 | 461  | 0 | 54 | MALE   | GX | Stage IVA |

|        |        |        |
|--------|--------|--------|
| T      | M      | N      |
| T2     | unknow | N0     |
| T2     | M0     | N0     |
| T1     | M0     | N2b    |
| T3     | unknow | N2b    |
| unknow | unknow | unknow |
| T2     | M0     | N2     |
| T4a    | M0     | N1     |
| T2     | unknow | N0     |
| T4a    | M0     | N2b    |
| T4a    | MX     | N0     |
| T3     | MX     | N2b    |
| T2     | unknow | N0     |
| T2     | M0     | N0     |
| T4a    | unknow | N2a    |
| T4b    | M0     | N2b    |
| T1     | M0     | N0     |
| unknow | unknow | unknow |
| T1     | M0     | N0     |
| T1     | MX     | N0     |
| T1     | M0     | N1     |
| T4a    | unknow | N0     |
| T3     | unknow | N2b    |
| T3     | unknow | N2b    |
| T2     | M0     | N0     |
| T4a    | M0     | N2c    |
| T4a    | unknow | N1     |
| TX     | unknow | NX     |
| T4a    | M0     | N0     |
| T2     | M0     | N1     |
| TX     | unknow | NX     |
| T3     | unknow | N1     |
| T4a    | unknow | N1     |
| T1     | unknow | N1     |
| T4b    | M0     | N0     |
| T3     | unknow | N2c    |
| T4a    | unknow | NX     |
| T4     | M0     | N2b    |
| T4a    | M0     | N0     |
| T2     | unknow | N0     |
| T2     | unknow | N0     |
| T2     | MX     | N2c    |
| T4a    | M0     | N2b    |
| TX     | unknow | NX     |
| T1     | unknow | N0     |
| T4a    | unknow | N2b    |
| T1     | unknow | N0     |
| T4a    | M0     | N2b    |
| T2     | unknow | N0     |
| T3     | unknow | N2b    |
| T4a    | unknow | N3     |
| T2     | MX     | N1     |

|        |        |        |
|--------|--------|--------|
| T2     | unknow | N0     |
| T4a    | M0     | N1     |
| T2     | unknow | N2     |
| T3     | unknow | N2b    |
| T4a    | M0     | N2a    |
| T4a    | M0     | N0     |
| T4a    | M0     | N2c    |
| unknow | unknow | unknow |
| T2     | M0     | N0     |
| TX     | unknow | NX     |
| T2     | M0     | N0     |
| T2     | unknow | N1     |
| T4a    | unknow | N2c    |
| T2     | MX     | N2b    |
| T4a    | unknow | N2c    |
| T3     | unknow | N2b    |
| T3     | unknow | N1     |
| T4a    | unknow | N0     |
| T2     | unknow | NX     |
| T4a    | M0     | N1     |
| T1     | M0     | NX     |
| T2     | M0     | N1     |
| unknow | unknow | unknow |
| T3     | M0     | N0     |
| T1     | M0     | N0     |
| T4a    | M0     | N2b    |
| T2     | M0     | N2b    |
| T4     | M0     | N2c    |
| T4a    | M0     | N2c    |
| T3     | M0     | N0     |
| T3     | unknow | N2     |
| T4a    | M0     | N0     |
| T4a    | M0     | N3     |
| T4a    | M0     | N0     |
| T4     | M0     | N0     |
| T3     | MX     | N2b    |
| T4a    | unknow | N0     |
| TX     | unknow | NX     |
| T4a    | M0     | N2b    |
| T3     | M0     | N1     |
| T4a    | M0     | N1     |
| T2     | unknow | N0     |
| T4a    | M0     | N0     |
| T3     | MX     | N0     |
| T3     | unknow | N2b    |
| T3     | MX     | N2b    |
| T3     | unknow | N0     |
| T2     | M0     | N1     |
| T3     | M0     | N0     |
| unknow | unknow | unknow |
| T4     | M0     | N0     |
| T2     | unknow | NX     |
| T2     | M0     | N1     |



|        |        |        |
|--------|--------|--------|
| unknow | unknow | unknow |
| T3     | unknow | N2b    |
| T4a    | MX     | N0     |
| T2     | unknow | N0     |
| T2     | M0     | N1     |
| T4a    | unknow | N0     |
| T3     | unknow | N2a    |
| T2     | unknow | N0     |
| T4a    | M0     | N2c    |
| T3     | M0     | N2c    |
| T2     | unknow | N0     |
| T2     | M0     | N0     |
| unknow | unknow | unknow |
| T2     | M0     | N1     |
| T2     | M0     | N0     |
| T4a    | MX     | N0     |
| T2     | M0     | N0     |
| T2     | M0     | N2b    |
| T3     | M0     | N0     |
| T1     | unknow | N2b    |
| T2     | unknow | N2b    |
| T4     | MX     | NX     |
| T2     | M0     | N2b    |
| T4a    | unknow | NX     |
| T4a    | unknow | N0     |
| T1     | MX     | NX     |
| T2     | unknow | N2b    |
| T1     | M0     | N1     |
| T3     | unknow | N2b    |
| T4a    | MX     | N0     |
| TX     | unknow | NX     |
| T3     | unknow | N2c    |
| T3     | MX     | N2     |
| T2     | unknow | N0     |
| T4a    | unknow | N2c    |
| T1     | M0     | N0     |
| T4a    | M0     | N0     |
| T4a    | M0     | N2b    |
| T3     | unknow | N2b    |
| T4a    | M0     | N2c    |
| T4     | M0     | N0     |
| unknow | unknow | unknow |
| T3     | unknow | N0     |
| T3     | MX     | N2b    |
| T2     | M0     | N2b    |
| T2     | unknow | N1     |
| T2     | M0     | N1     |
| T3     | unknow | N2c    |
| T3     | M0     | N1     |
| T1     | MX     | N0     |
| T2     | unknow | N1     |
| T2     | unknow | NX     |
| T2     | M0     | N1     |

|        |        |        |
|--------|--------|--------|
| T4a    | M0     | N0     |
| T2     | unknow | N2b    |
| T3     | M0     | N2b    |
| T2     | M0     | N1     |
| T3     | unknow | N0     |
| T2     | unknow | N2b    |
| T4a    | unknow | N2b    |
| T2     | unknow | NX     |
| T4a    | M0     | N2c    |
| T4a    | unknow | N2b    |
| T4a    | M0     | N1     |
| T3     | M0     | N2c    |
| unknow | unknow | unknow |
| T3     | unknow | N2b    |
| T4a    | M0     | N2c    |
| T4a    | unknow | N2c    |
| T2     | M0     | N1     |
| TX     | unknow | NX     |
| T1     | M0     | N0     |
| T4a    | M0     | N2c    |
| T4a    | unknow | N2b    |
| T1     | unknow | N1     |
| T4a    | unknow | N2b    |
| T2     | M0     | N1     |
| T2     | unknow | NX     |
| T2     | M0     | NX     |
| T3     | M0     | N0     |
| T4     | M0     | N2b    |
| TX     | unknow | NX     |
| T3     | MX     | N0     |
| unknow | unknow | unknow |
| T3     | unknow | N2b    |
| T4a    | M0     | N2b    |
| T2     | M0     | N2b    |
| T1     | unknow | NX     |
| T2     | M0     | N0     |
| T2     | M0     | N0     |
| T1     | unknow | N0     |
| T3     | MX     | N0     |
| TX     | MX     | NX     |
| T2     | M0     | N1     |
| T2     | M0     | N0     |
| T2     | M0     | N0     |
| unknow | unknow | unknow |
| T1     | M0     | N0     |
| T4a    | unknow | N2b    |
| T1     | M0     | N0     |
| T3     | unknow | N2c    |
| T1     | unknow | N0     |
| TX     | unknow | NX     |
| T1     | unknow | N1     |
| T3     | unknow | N2b    |
| T1     | MX     | N1     |

|     |        |     |
|-----|--------|-----|
| T3  | MX     | N1  |
| T2  | unknow | N2b |
| T4a | MX     | NX  |
| T4a | unknow | N0  |
| T2  | unknow | N1  |
| T1  | unknow | N0  |
| T3  | M0     | N0  |
| T4a | unknow | N0  |
| T4  | M0     | N2b |
| T2  | unknow | NX  |
| T2  | M0     | N0  |
| T4a | M0     | N0  |
| T2  | M0     | N2c |
| T2  | unknow | NX  |
| TX  | unknow | NX  |
| T4a | M0     | N0  |
| T4a | M0     | N2c |
| T2  | unknow | NX  |
| T4a | MX     | N2c |
| TX  | unknow | NX  |
| T4a | M0     | N0  |
| T2  | unknow | N0  |
| T3  | unknow | N0  |
| T4a | unknow | N0  |
| T4a | M0     | N0  |
| T4b | MX     | N0  |
| T4a | MX     | N2  |
| T2  | MX     | N0  |
| T2  | unknow | N0  |
| T2  | unknow | N0  |
| T4a | unknow | N0  |
| T4b | unknow | N0  |
| T4a | M0     | N0  |
| T2  | unknow | NX  |
| T2  | M0     | N0  |
| T2  | unknow | NX  |
| T4a | M0     | N2  |
| T2  | unknow | N1  |
| T4a | unknow | N2  |
| T4a | M0     | N0  |
| T2  | unknow | NX  |
| T2  | unknow | N0  |
| T1  | MX     | NX  |
| T4  | MX     | N0  |
| T4  | MX     | N2b |
| T2  | MX     | N2c |
| T4a | unknow | N0  |
| T3  | MX     | N2b |
| T4a | M0     | N0  |
| T3  | M0     | N1  |
| T3  | M0     | N2b |
| T1  | unknow | N0  |
| T3  | unknow | N0  |

|        |        |        |
|--------|--------|--------|
| T4a    | MX     | N1     |
| T2     | unknow | N1     |
| T2     | unknow | N2b    |
| T2     | unknow | N2b    |
| T3     | unknow | N0     |
| T4a    | M0     | N2c    |
| T4a    | unknow | N1     |
| T4a    | MX     | N2b    |
| T4a    | M0     | N1     |
| T1     | unknow | N0     |
| TX     | unknow | NX     |
| unknow | unknow | unknow |
| T4a    | unknow | N2b    |
| T4a    | unknow | N2b    |
| T2     | unknow | NX     |
| T4a    | M0     | N0     |
| T4     | MX     | N0     |
| T4a    | M0     | N0     |
| T3     | M0     | N0     |
| T3     | M0     | N1     |
| T2     | unknow | N2b    |
| T4a    | MX     | N2b    |
| T3     | M0     | N2b    |
| T4a    | M0     | N2b    |
| T2     | M0     | N2c    |
| T3     | unknow | NX     |
| T4a    | M0     | N2b    |
| T3     | unknow | N2b    |
| T4a    | unknow | N2b    |
| T3     | unknow | N2b    |
| T2     | unknow | N0     |
| T3     | unknow | N0     |
| T4a    | M0     | N1     |
