# Supplementary material for: Characterization of Cancer Stem Cell Characteristics and Development of a Prognostic Stemness Index Cell-Related Signature in Oral Squamous Cell Carcinoma
Source: Hindawi journal article supplement (doi:10.1155/2021/1571421), 2021-11-09
Supplement: f2 [file 1571421.f2.pdf]

Supplementary table 2. The mRNAsi of OSCC patients from TCGA dataset.

| ID           | futime      | fustat | mRNAsi      | Group |
|--------------|-------------|--------|-------------|-------|
| TCGA-4P-AA8J | 0.279452055 | 0      | 0.248501314 | Low   |
| TCGA-BA-4074 | 1.265753425 | 1      | 0.482600686 | High  |
| TCGA-BA-5151 | 0.520547945 | 0      | 0.414790184 | High  |
| TCGA-BA-5152 | 2.317808219 | 0      | 0.446315722 | High  |
| TCGA-BA-5556 | 0.490410959 | 0      | 0.420790696 | High  |
| TCGA-BA-5557 | 0.663013699 | 0      | 0.284066202 | Low   |
| TCGA-BA-5558 | 4.482191781 | 0      | 0.463803031 | High  |
| TCGA-BA-6871 | 0.17260274  | 0      | 0.421300583 | High  |
| TCGA-BA-6872 | 1.052054795 | 1      | 0.409216338 | High  |
| TCGA-BA-6873 | 0.334246575 | 0      | 0.449307057 | High  |
| TCGA-BA-7269 | 3.487671233 | 0      | 0.381771922 | High  |
| TCGA-BA-A6D8 | 2.328767123 | 0      | 0.457323605 | High  |
| TCGA-BA-A6DB | 0.591780822 | 0      | 0.319091299 | Low   |
| TCGA-BA-A6DD | 0.473972603 | 1      | 0.401408946 | High  |
| TCGA-BA-A6DE | 1.205479452 | 0      | 0.477370936 | High  |
| TCGA-BA-A6DG | 0.189041096 | 1      | 0.181420174 | Low   |
| TCGA-BA-A6DJ | 1.115068493 | 1      | 0.417325265 | High  |
| TCGA-BB-4224 | 0.761643836 | 0      | 0.516092804 | High  |
| TCGA-BB-4225 | 0.4         | 0      | 0.464270494 | High  |
| TCGA-BB-4228 | 1.528767123 | 0      | 0.466980536 | High  |
| TCGA-BB-8601 | 1.709589041 | 0      | 0.509804919 | High  |
| TCGA-BB-A5HU | 2.142465753 | 0      | 0.33592277  | Low   |
| TCGA-BB-A5HZ | 2.265753425 | 0      | 0.468802037 | High  |
| TCGA-BB-A6UO | 0.734246575 | 1      | 0.38818362  | High  |
| TCGA-C9-A47Z | 0.523287671 | 1      | 0.42049737  | High  |
| TCGA-C9-A480 | 1.057534247 | 0      | 0.40445427  | High  |
| TCGA-CN-4725 | 3.169863014 | 0      | 0.431896882 | High  |
| TCGA-CN-4726 | 0.389041096 | 1      | 0.341255452 | Low   |
| TCGA-CN-4728 | 3.153424658 | 0      | 0.231948409 | Low   |
| TCGA-CN-4729 | 1.073972603 | 0      | 0.389659043 | High  |
| TCGA-CN-4730 | 2.238356164 | 0      | 0.592758542 | High  |
| TCGA-CN-4731 | 2.720547945 | 0      | 0.351175751 | Low   |
| TCGA-CN-4733 | 4.345205479 | 0      | 0.319579673 | Low   |
| TCGA-CN-4734 | 2.076712329 | 0      | 0.398018892 | High  |
| TCGA-CN-4736 | 1.082191781 | 1      | 0.288511405 | Low   |
| TCGA-CN-4737 | 1.712328767 | 0      | 0.267817758 | Low   |
| TCGA-CN-4740 | 2.221917808 | 0      | 0.308002688 | Low   |
| TCGA-CN-4741 | 3.473972603 | 0      | 0.451789526 | High  |
| TCGA-CN-4742 | 1.087671233 | 1      | 0.325254842 | Low   |
| TCGA-CN-5358 | 0.715068493 | 1      | 0.283068408 | Low   |
| TCGA-CN-5359 | 1.032876712 | 1      | 0.383073403 | High  |
| TCGA-CN-5364 | 1.350684932 | 1      | 0.456904431 | High  |
| TCGA-CN-5367 | 0.964383562 | 1      | 0.471430162 | High  |
| TCGA-CN-5369 | 0.002739726 | 1      | 0.395206641 | High  |
| TCGA-CN-5370 | 0.709589041 | 1      | 0.345929983 | Low   |
| TCGA-CN-5373 | 4.339726027 | 0      | 0.292515321 | Low   |
| TCGA-CN-6011 | 2.556164384 | 0      | 0.367672528 | High  |
| TCGA-CN-6013 | 1.720547945 | 0      | 0.355989637 | Low   |
| TCGA-CN-6016 | 1.62739726  | 0      | 0.141820934 | Low   |
| TCGA-CN-6017 | 1.723287671 | 0      | 0.262573659 | Low   |
| TCGA-CN-6018 | 1.589041096 | 1      | 0.376492473 | High  |

|              |             |   |             |      |
|--------------|-------------|---|-------------|------|
| TCGA-CN-6019 | 1.183561644 | 0 | 0.165547097 | Low  |
| TCGA-CN-6020 | 0.561643836 | 1 | 0.376420375 | High |
| TCGA-CN-6024 | 0.61369863  | 0 | 0.38160446  | High |
| TCGA-CN-6994 | 2.01369863  | 0 | 0.325693122 | Low  |
| TCGA-CN-6995 | 0.306849315 | 1 | 0.45660008  | High |
| TCGA-CN-6996 | 1.452054795 | 1 | 0.380533156 | High |
| TCGA-CN-6998 | 0.126027397 | 0 | 0.382467857 | High |
| TCGA-CN-A498 | 1.21369863  | 0 | 0.37683874  | High |
| TCGA-CN-A49A | 1.071232877 | 0 | 0.315668747 | Low  |
| TCGA-CN-A63V | 1.326027397 | 0 | 0.299339348 | Low  |
| TCGA-CN-A642 | 0.224657534 | 1 | 0.420310662 | High |
| TCGA-CN-A6UY | 0.84109589  | 0 | 0.494321526 | High |
| TCGA-CN-A6V6 | 0.64109589  | 0 | 0.433988492 | High |
| TCGA-CQ-5323 | 4.016438356 | 0 | 0.506750702 | High |
| TCGA-CQ-5324 | 4.364383562 | 0 | 0.379479067 | High |
| TCGA-CQ-5325 | 1.791780822 | 1 | 0.371842777 | High |
| TCGA-CQ-5326 | 0.243835616 | 1 | 0.443893533 | High |
| TCGA-CQ-5327 | 4.547945205 | 0 | 0.456935725 | High |
| TCGA-CQ-5329 | 3.895890411 | 0 | 0.402710186 | High |
| TCGA-CQ-5330 | 3.816438356 | 0 | 0.343667304 | Low  |
| TCGA-CQ-5331 | 3.832876712 | 0 | 0.466562406 | High |
| TCGA-CQ-5332 | 0.868493151 | 1 | 0.421028633 | High |
| TCGA-CQ-5333 | 0.934246575 | 1 | 0.366237455 | High |
| TCGA-CQ-5334 | 0.353424658 | 1 | 0.404002581 | High |
| TCGA-CQ-6218 | 3.432876712 | 0 | 0.401069958 | High |
| TCGA-CQ-6219 | 1.312328767 | 1 | 0.417014506 | High |
| TCGA-CQ-6220 | 2.698630137 | 1 | 0.462011917 | High |
| TCGA-CQ-6222 | 3.854794521 | 0 | 0.352079171 | Low  |
| TCGA-CQ-6223 | 3.912328767 | 0 | 0.439196094 | High |
| TCGA-CQ-6224 | 3.698630137 | 0 | 0.243180708 | Low  |
| TCGA-CQ-6225 | 1.104109589 | 1 | 0.531438364 | High |
| TCGA-CQ-6227 | 0.353424658 | 1 | 0.298803154 | Low  |
| TCGA-CQ-6228 | 1.249315068 | 1 | 0.452205836 | High |
| TCGA-CQ-6229 | 3.230136986 | 0 | 0.405267654 | High |
| TCGA-CQ-7063 | 4.794520548 | 0 | 0.389070648 | High |
| TCGA-CQ-7065 | 3.657534247 | 0 | 0.370773559 | High |
| TCGA-CQ-7068 | 2.646575342 | 0 | 0.427317219 | High |
| TCGA-CQ-7069 | 3.490410959 | 0 | 0.265494047 | Low  |
| TCGA-CQ-7071 | 2.402739726 | 0 | 0.38769463  | High |
| TCGA-CQ-7072 | 5.342465753 | 0 | 0.219006854 | Low  |
| TCGA-CQ-A4C6 | 3.706849315 | 0 | 0.369735504 | High |
| TCGA-CQ-A4C9 | 1.936986301 | 0 | 0.469426215 | High |
| TCGA-CQ-A4CB | 2.446575342 | 0 | 0.421597682 | High |
| TCGA-CQ-A4CE | 2.150684932 | 0 | 0.457247927 | High |
| TCGA-CQ-A4CG | 1.178082192 | 1 | 0.384015874 | High |
| TCGA-CQ-A4CH | 1.016438356 | 0 | 0.391365433 | High |
| TCGA-CQ-A4CI | 2.602739726 | 0 | 0.521525996 | High |
| TCGA-CR-5250 | 2.189041096 | 0 | 0.380824519 | High |
| TCGA-CR-6471 | 3.293150685 | 1 | 0.406171906 | High |
| TCGA-CR-6472 | 2.876712329 | 0 | 0.505887243 | High |
| TCGA-CR-6477 | 1.408219178 | 0 | 0.34018274  | Low  |
| TCGA-CR-6484 | 0.969863014 | 0 | 0.385274127 | High |
| TCGA-CR-6488 | 1.038356164 | 0 | 0.256991289 | Low  |

|              |             |   |             |      |
|--------------|-------------|---|-------------|------|
| TCGA-CR-6491 | 1.898630137 | 0 | 0.409621405 | High |
| TCGA-CR-6492 | 1.312328767 | 0 | 0.387398012 | High |
| TCGA-CR-6493 | 0.77260274  | 1 | 0.494508179 | High |
| TCGA-CR-7365 | 3.263013699 | 0 | 0.355152717 | Low  |
| TCGA-CR-7367 | 3.945205479 | 0 | 0.354146451 | Low  |
| TCGA-CR-7368 | 3.410958904 | 0 | 0.470353871 | High |
| TCGA-CR-7369 | 2.98630137  | 1 | 0.414267362 | High |
| TCGA-CR-7372 | 2.079452055 | 0 | 0.354244645 | Low  |
| TCGA-CR-7373 | 2.435616438 | 0 | 0.465074684 | High |
| TCGA-CR-7376 | 2.663013699 | 0 | 0.239109959 | Low  |
| TCGA-CR-7377 | 0.764383562 | 1 | 0.316003226 | Low  |
| TCGA-CR-7379 | 2.838356164 | 0 | 0.436914888 | High |
| TCGA-CR-7380 | 1.660273973 | 1 | 0.405425798 | High |
| TCGA-CR-7382 | 2.180821918 | 0 | 0.291687793 | Low  |
| TCGA-CR-7386 | 3.917808219 | 0 | 0.238367777 | Low  |
| TCGA-CR-7390 | 4.131506849 | 0 | 0.454297873 | High |
| TCGA-CR-7391 | 2.501369863 | 0 | 0.308018368 | Low  |
| TCGA-CR-7392 | 3.904109589 | 0 | 0.305423182 | Low  |
| TCGA-CR-7393 | 2.720547945 | 0 | 0.254382301 | Low  |
| TCGA-CR-7394 | 3.687671233 | 0 | 0.340629753 | Low  |
| TCGA-CR-7395 | 2.547945205 | 0 | 0.391050099 | High |
| TCGA-CR-7397 | 2.065753425 | 0 | 0.256485765 | Low  |
| TCGA-CR-7401 | 2.950684932 | 0 | 0.292564651 | Low  |
| TCGA-CV-5436 | 1.6         | 1 | 0.42329328  | High |
| TCGA-CV-5439 | 1.495890411 | 1 | 0.429887189 | High |
| TCGA-CV-5442 | 6.375342466 | 0 | 0.545508652 | High |
| TCGA-CV-5966 | 1.493150685 | 1 | 0.516466113 | High |
| TCGA-CV-5970 | 1.112328767 | 1 | 0.344088265 | Low  |
| TCGA-CV-5971 | 1.920547945 | 0 | 0.238394734 | Low  |
| TCGA-CV-5973 | 7.235616438 | 0 | 0.339633745 | Low  |
| TCGA-CV-5976 | 4.049315068 | 0 | 0.353666647 | Low  |
| TCGA-CV-5977 | 5.04109589  | 0 | 0.471748558 | High |
| TCGA-CV-5979 | 3.602739726 | 0 | 0.339755522 | Low  |
| TCGA-CV-6003 | 4.561643836 | 0 | 0.478481221 | High |
| TCGA-CV-6433 | 1.756164384 | 0 | 0.501382779 | High |
| TCGA-CV-6436 | 5.202739726 | 0 | 0.48719423  | High |
| TCGA-CV-6441 | 0.8         | 1 | 0.460132254 | High |
| TCGA-CV-6933 | 7.509589041 | 1 | 0.400037397 | High |
| TCGA-CV-6934 | 0.178082192 | 1 | 0.195570252 | Low  |
| TCGA-CV-6936 | 0.454794521 | 1 | 0.479814438 | High |
| TCGA-CV-6937 | 1.709589041 | 1 | 0.358073552 | Low  |
| TCGA-CV-6938 | 0.394520548 | 1 | 0.460124886 | High |
| TCGA-CV-6939 | 1.824657534 | 1 | 0.39640835  | High |
| TCGA-CV-6940 | 2.202739726 | 1 | 0.407239435 | High |
| TCGA-CV-6941 | 0.936986301 | 1 | 0.393454809 | High |
| TCGA-CV-6942 | 11.73150685 | 0 | 0.383892753 | High |
| TCGA-CV-6943 | 1.649315068 | 1 | 0.261716145 | Low  |
| TCGA-CV-6945 | 1.002739726 | 1 | 0.36551087  | High |
| TCGA-CV-6948 | 3.531506849 | 1 | 0.529834459 | High |
| TCGA-CV-6950 | 1.257534247 | 1 | 0.36648052  | High |
| TCGA-CV-6951 | 2.506849315 | 1 | 0.378250379 | High |
| TCGA-CV-6952 | 0.506849315 | 1 | 0.384416193 | High |
| TCGA-CV-6953 | 4.495890411 | 1 | 0.416700326 | High |

|              |             |   |             |      |
|--------------|-------------|---|-------------|------|
| TCGA-CV-6954 | 5.484931507 | 1 | 0.409537264 | High |
| TCGA-CV-6955 | 0.915068493 | 1 | 0.4639956   | High |
| TCGA-CV-6956 | 0.594520548 | 1 | 0.464316863 | High |
| TCGA-CV-6959 | 0.701369863 | 1 | 0.374800324 | High |
| TCGA-CV-6960 | 2.361643836 | 1 | 0.427184818 | High |
| TCGA-CV-6961 | 0.208219178 | 1 | 0.352983435 | Low  |
| TCGA-CV-7090 | 14.3890411  | 0 | 0.354079533 | Low  |
| TCGA-CV-7091 | 9.263013699 | 0 | 0.423574165 | High |
| TCGA-CV-7095 | 1.567123288 | 1 | 0.41283629  | High |
| TCGA-CV-7097 | 1.054794521 | 1 | 0.438081501 | High |
| TCGA-CV-7099 | 0.665753425 | 1 | 0.464860426 | High |
| TCGA-CV-7100 | 0.750684932 | 1 | 0.437536865 | High |
| TCGA-CV-7102 | 0.153424658 | 1 | 0.380334812 | High |
| TCGA-CV-7103 | 4.35890411  | 1 | 0.253101224 | Low  |
| TCGA-CV-7104 | 1.076712329 | 1 | 0.318149766 | Low  |
| TCGA-CV-7178 | 5.934246575 | 1 | 0.402488982 | High |
| TCGA-CV-7180 | 0.895890411 | 1 | 0.480559502 | High |
| TCGA-CV-7183 | 10.90684932 | 0 | 0.380884415 | High |
| TCGA-CV-7235 | 6.430136986 | 0 | 0.346063259 | Low  |
| TCGA-CV-7236 | 0.394520548 | 1 | 0.336949228 | Low  |
| TCGA-CV-7238 | 7.471232877 | 0 | 0.324248868 | Low  |
| TCGA-CV-7252 | 0.41369863  | 1 | 0.397229158 | High |
| TCGA-CV-7253 | 0.989041096 | 1 | 0.478061857 | High |
| TCGA-CV-7254 | 3.997260274 | 1 | 0.347224894 | Low  |
| TCGA-CV-7255 | 0.175342466 | 1 | 0.368310313 | High |
| TCGA-CV-7263 | 1.534246575 | 1 | 0.416236343 | High |
| TCGA-CV-7406 | 4.789041096 | 1 | 0.37822032  | High |
| TCGA-CV-7407 | 2.961643836 | 1 | 0.418970951 | High |
| TCGA-CV-7411 | 7.443835616 | 1 | 0.319304756 | Low  |
| TCGA-CV-7413 | 0.805479452 | 1 | 0.317147783 | Low  |
| TCGA-CV-7414 | 0.038356164 | 1 | 0.364014673 | High |
| TCGA-CV-7416 | 2.090410959 | 1 | 0.352113742 | Low  |
| TCGA-CV-7423 | 8.380821918 | 1 | 0.385718885 | High |
| TCGA-CV-7425 | 4.706849315 | 1 | 0.458773825 | High |
| TCGA-CV-7427 | 13.04109589 | 1 | 0.434153069 | High |
| TCGA-CV-7428 | 4.578082192 | 1 | 0.463415147 | High |
| TCGA-CV-7429 | 0.293150685 | 1 | 0.419182688 | High |
| TCGA-CV-7432 | 7.04109589  | 1 | 0.519984187 | High |
| TCGA-CV-7434 | 0.597260274 | 1 | 0.4632422   | High |
| TCGA-CV-7435 | 12.82191781 | 1 | 0.352046564 | Low  |
| TCGA-CV-7438 | 0.531506849 | 1 | 0.34853714  | Low  |
| TCGA-CV-7446 | 2.994520548 | 1 | 0.387266299 | High |
| TCGA-CV-7568 | 2.539726027 | 1 | 0.334911772 | Low  |
| TCGA-CV-A45O | 2.331506849 | 0 | 0.342053144 | Low  |
| TCGA-CV-A45P | 1.750684932 | 0 | 0.408089169 | High |
| TCGA-CV-A45Q | 14.11506849 | 1 | 0.494471395 | High |
| TCGA-CV-A45R | 15.01369863 | 0 | 0.294236504 | Low  |
| TCGA-CV-A45T | 13.30410959 | 1 | 0.404339073 | High |
| TCGA-CV-A45U | 2.956164384 | 1 | 0.416334574 | High |
| TCGA-CV-A45V | 0.087671233 | 1 | 0.380389969 | High |
| TCGA-CV-A45X | 0.542465753 | 1 | 0.414022899 | High |
| TCGA-CV-A463 | 0.063013699 | 1 | 0.451587224 | High |
| TCGA-CV-A464 | 4.717808219 | 0 | 0.311799279 | Low  |

|              |             |   |             |      |
|--------------|-------------|---|-------------|------|
| TCGA-CV-A465 | 0.589041096 | 1 | 0.439026501 | High |
| TCGA-CV-A468 | 1.271232877 | 1 | 0.334821755 | Low  |
| TCGA-CV-A6JD | 0.498630137 | 1 | 0.299953603 | Low  |
| TCGA-CV-A6JE | 2.945205479 | 0 | 0.435547491 | High |
| TCGA-CV-A6JM | 0.531506849 | 1 | 0.508433743 | High |
| TCGA-CV-A6JN | 2.482191781 | 0 | 0.460485517 | High |
| TCGA-CV-A6JO | 0.539726027 | 1 | 0.422997036 | High |
| TCGA-CV-A6JT | 2.334246575 | 0 | 0.276199874 | Low  |
| TCGA-CV-A6JU | 0.301369863 | 0 | 0.450512922 | High |
| TCGA-CV-A6JY | 1.769863014 | 0 | 0.501440721 | High |
| TCGA-CV-A6JZ | 1.956164384 | 0 | 0.443363398 | High |
| TCGA-CV-A6K0 | 1.660273973 | 0 | 0.314229386 | Low  |
| TCGA-CV-A6K2 | 0.868493151 | 1 | 0.386145972 | High |
| TCGA-CX-7085 | 0.879452055 | 0 | 0.237856583 | Low  |
| TCGA-CX-7086 | 1.569863014 | 0 | 0.540411834 | High |
| TCGA-CX-7219 | 2.863013699 | 0 | 0.383633597 | High |
| TCGA-CX-A4AQ | 4.260273973 | 0 | 0.34204191  | Low  |
| TCGA-D6-6515 | 1.104109589 | 1 | 0.324327166 | Low  |
| TCGA-D6-6516 | 2.117808219 | 0 | 0.474804772 | High |
| TCGA-D6-6823 | 1.920547945 | 0 | 0.56285343  | High |
| TCGA-D6-6825 | 1.345205479 | 0 | 0.40218224  | High |
| TCGA-D6-6827 | 1.556164384 | 0 | 0.453545918 | High |
| TCGA-D6-8569 | 2.109589041 | 0 | 0.422283301 | High |
| TCGA-D6-A4Z9 | 1.476712329 | 0 | 0.447262681 | High |
| TCGA-D6-A4ZB | 1.030136986 | 0 | 0.352275942 | Low  |
| TCGA-D6-A6EM | 0.635616438 | 0 | 0.496012637 | High |
| TCGA-D6-A6EN | 1.202739726 | 0 | 0.484336548 | High |
| TCGA-D6-A6EO | 1.191780822 | 0 | 0.555474027 | High |
| TCGA-DQ-5624 | 4.871232877 | 0 | 0.250624516 | Low  |
| TCGA-DQ-5625 | 3.104109589 | 1 | 0.346535931 | Low  |
| TCGA-DQ-5630 | 2.821917808 | 0 | 0.261484572 | Low  |
| TCGA-DQ-5631 | 1.501369863 | 1 | 0.374493314 | High |
| TCGA-DQ-7588 | 1.169863014 | 1 | 0.549616692 | High |
| TCGA-DQ-7591 | 1.704109589 | 0 | 0.534783802 | High |
| TCGA-DQ-7592 | 1.41369863  | 0 | 0.405889405 | High |
| TCGA-F7-8489 | 1.802739726 | 0 | 0.312803618 | Low  |
| TCGA-F7-A50G | 1.687671233 | 0 | 0.360224952 | Low  |
| TCGA-F7-A50J | 1.602739726 | 0 | 0.38651791  | High |
| TCGA-F7-A61S | 1.578082192 | 0 | 0.428020999 | High |
| TCGA-F7-A61V | 1.052054795 | 0 | 0.496116287 | High |
| TCGA-F7-A61W | 0.038356164 | 0 | 0.469696308 | High |
| TCGA-F7-A620 | 1.487671233 | 0 | 0.443173506 | High |
| TCGA-F7-A624 | 1.035616438 | 0 | 0.541355459 | High |
| TCGA-H7-7774 | 1.115068493 | 0 | 0.443669479 | High |
| TCGA-H7-8501 | 1.263013699 | 0 | 0.46908971  | High |
| TCGA-H7-8502 | 1.254794521 | 0 | 0.45805971  | High |
| TCGA-H7-A6C4 | 1.134246575 | 0 | 0.328006315 | Low  |
| TCGA-HD-7831 | 0.989041096 | 0 | 0.152518918 | Low  |
| TCGA-HD-7832 | 0.95890411  | 0 | 0.53612597  | High |
| TCGA-HD-8224 | 1.221917808 | 1 | 0.35493226  | Low  |
| TCGA-HD-8314 | 1.835616438 | 0 | 0.420550049 | High |
| TCGA-HD-8634 | 1.054794521 | 1 | 0.43507574  | High |
| TCGA-HD-8635 | 1.904109589 | 0 | 0.327592719 | Low  |

|              |             |   |             |      |
|--------------|-------------|---|-------------|------|
| TCGA-HD-A4C1 | 0.030136986 | 0 | 0.417721822 | High |
| TCGA-HD-A633 | 1.153424658 | 0 | 0.435164125 | High |
| TCGA-HD-A6HZ | 0.304109589 | 0 | 0.388511701 | High |
| TCGA-HD-A6I0 | 0.575342466 | 0 | 0.506542676 | High |
| TCGA-HL-7533 | 2.895890411 | 0 | 0.498811897 | High |
| TCGA-IQ-7632 | 1.208219178 | 0 | 0.44505689  | High |
| TCGA-IQ-A61E | 3.142465753 | 0 | 0.414151203 | High |
| TCGA-IQ-A61G | 0.98630137  | 0 | 0.550604544 | High |
| TCGA-IQ-A61H | 3.117808219 | 0 | 0.481638853 | High |
| TCGA-IQ-A61J | 2.797260274 | 0 | 0.270107311 | Low  |
| TCGA-IQ-A6SG | 1.58630137  | 0 | 0.441715669 | High |
| TCGA-IQ-A6SH | 1.290410959 | 0 | 0.43908731  | High |
| TCGA-KU-A66T | 1.512328767 | 0 | 0.410374423 | High |
| TCGA-KU-A6H8 | 0.895890411 | 1 | 0.326606649 | Low  |
| TCGA-MT-A51X | 0.663013699 | 0 | 0.38398785  | High |
| TCGA-MT-A67A | 2.504109589 | 0 | 0.486699609 | High |
| TCGA-MT-A67D | 0.153424658 | 0 | 0.435604217 | High |
| TCGA-MT-A67F | 1.052054795 | 0 | 0.385655837 | High |
| TCGA-MT-A7BN | 1.284931507 | 0 | 0.412518494 | High |
| TCGA-MZ-A7D7 | 1.498630137 | 0 | 0.464592208 | High |
| TCGA-P3-A5QA | 4.728767123 | 0 | 0.27620344  | Low  |
| TCGA-P3-A5QE | 4.271232877 | 0 | 0.465158587 | High |
| TCGA-P3-A5QF | 0.904109589 | 1 | 0.554634817 | High |
| TCGA-P3-A6T0 | 1.583561644 | 0 | 0.327740105 | Low  |
| TCGA-P3-A6T2 | 5.931506849 | 0 | 0.46894628  | High |
| TCGA-P3-A6T3 | 1.580821918 | 1 | 0.383698369 | High |
| TCGA-P3-A6T4 | 0.169863014 | 1 | 0.413306488 | High |
| TCGA-P3-A6T5 | 2.416438356 | 1 | 0.375559675 | High |
| TCGA-P3-A6T6 | 1.082191781 | 1 | 0.552952517 | High |
| TCGA-P3-A6T7 | 1.334246575 | 1 | 0.446502133 | High |
| TCGA-P3-A6T8 | 1.095890411 | 0 | 0.24812998  | Low  |
| TCGA-QK-A64Z | 1.756164384 | 1 | 0.381261064 | High |
| TCGA-QK-A652 | 0.978082192 | 0 | 0.323223842 | Low  |
| TCGA-QK-A6IG | 0.608219178 | 1 | 0.499389611 | High |
| TCGA-QK-A6IH | 1.391780822 | 0 | 0.405229507 | High |
| TCGA-QK-A6II | 0.778082192 | 1 | 0.398384718 | High |
| TCGA-QK-A6IJ | 1.060273973 | 0 | 0.460912025 | High |
| TCGA-QK-A6VB | 1.232876712 | 0 | 0.534844118 | High |
| TCGA-QK-A8Z7 | 0.542465753 | 0 | 0.564456289 | High |
| TCGA-QK-A8Z9 | 0.964383562 | 0 | 0.236174582 | Low  |
| TCGA-QK-AA3K | 0.693150685 | 0 | 0.300398719 | Low  |
| TCGA-RS-A6TO | 1.060273973 | 1 | 0.390030073 | High |
| TCGA-T2-A6WX | 0.57260274  | 1 | 0.456851846 | High |
| TCGA-T2-A6WZ | 1.326027397 | 1 | 0.482156612 | High |
| TCGA-T2-A6X2 | 2.704109589 | 0 | 0.373194094 | High |
| TCGA-T3-A92N | 0.260273973 | 1 | 0.476819246 | High |
| TCGA-UF-A719 | 4.556164384 | 0 | 0.577942162 | High |
| TCGA-UF-A71A | 0.235616438 | 1 | 0.404750107 | High |
| TCGA-UF-A71B | 3.61369863  | 0 | 0.435456465 | High |
| TCGA-UF-A71E | 3.501369863 | 0 | 0.457186554 | High |
| TCGA-UF-A7JA | 5.189041096 | 0 | 0.362424095 | Low  |
| TCGA-UF-A7JC | 1.495890411 | 1 | 0.427119574 | High |
| TCGA-UF-A7JD | 2.01369863  | 0 | 0.293161673 | Low  |

|              |             |   |             |      |
|--------------|-------------|---|-------------|------|
| TCGA-UF-A7JO | 1.728767123 | 1 | 0.467419134 | High |
| TCGA-UF-A7JS | 1.863013699 | 1 | 0.46497219  | High |
| TCGA-UF-A7JT | 2.720547945 | 1 | 0.435714617 | High |
| TCGA-UP-A6WW | 1.419178082 | 0 | 0.457719979 | High |
| TCGA-WA-A7GZ | 1.712328767 | 1 | 0.432352881 | High |
| TCGA-WA-A7H4 | 1.21369863  | 0 | 0.290953168 | Low  |
