# Supplementary material for: Characterization of Cancer Stem Cell Characteristics and Development of a Prognostic Stemness Index Cell-Related Signature in Oral Squamous Cell Carcinoma
Source: Hindawi journal article supplement (doi:10.1155/2021/1571421), 2021-11-09
Supplement: f3 [file 1571421.f3.pdf]

Supplementary table 3. The mRNA<sub>asi</sub>-related DEGs for OSCC.

| ID     | logFC        | AveExpr     | t            | P.Value  | adj.P.Val |
|--------|--------------|-------------|--------------|----------|-----------|
| ACTA1  | -2.973267019 | 3.393800472 | -7.932649702 | 3.61E-14 | 2.22E-12  |
| DES    | -2.893186075 | 3.847984686 | -7.496002617 | 6.48E-13 | 3.06E-11  |
| MYL2   | -2.517020692 | 2.468565    | -8.184200354 | 6.53E-15 | 4.69E-13  |
| MYL1   | -2.51139507  | 2.581848172 | -7.912104591 | 4.15E-14 | 2.51E-12  |
| CKM    | -2.464828111 | 2.940315849 | -7.533850194 | 5.07E-13 | 2.46E-11  |
| ACTC1  | -2.338005424 | 2.471317456 | -8.123673278 | 9.88E-15 | 6.87E-13  |
| MYBPH  | -2.335851887 | 2.460551226 | -8.110924558 | 1.08E-14 | 7.38E-13  |
| MMP13  | -2.278244292 | 4.063717167 | -8.195979338 | 6.02E-15 | 4.37E-13  |
| TNNC1  | -2.247054734 | 2.595426186 | -7.678132579 | 1.97E-13 | 1.03E-11  |
| SLN    | -2.216828125 | 2.297512819 | -7.803874507 | 8.56E-14 | 4.80E-12  |
| SFRP2  | -2.209232695 | 5.471274248 | -11.13840145 | 1.41E-24 | 6.60E-22  |
| POSTN  | -2.206763232 | 4.942366099 | -10.71500767 | 4.21E-23 | 1.50E-20  |
| MB     | -2.200712341 | 2.692784479 | -7.802280879 | 8.65E-14 | 4.85E-12  |
| COL3A1 | -2.157575288 | 7.946179158 | -11.15188386 | 1.26E-24 | 5.97E-22  |
| THBS4  | -2.14076334  | 2.200024514 | -10.53159285 | 1.80E-22 | 5.69E-20  |
| CSRP3  | -2.120385015 | 2.086837148 | -7.503783329 | 6.16E-13 | 2.93E-11  |
| MYH2   | -2.118639832 | 1.888823102 | -7.173409965 | 5.09E-12 | 2.03E-10  |
| COL1A2 | -2.076557492 | 7.151146605 | -11.50258872 | 7.23E-26 | 4.90E-23  |
| FN1    | -2.064679905 | 5.845101882 | -9.943526229 | 1.75E-20 | 3.74E-18  |
| TNNT3  | -2.064385691 | 3.029286363 | -7.091777959 | 8.50E-12 | 3.28E-10  |
| COL1A1 | -2.051294791 | 8.213109747 | -11.29940845 | 3.80E-25 | 2.06E-22  |
| MYLPF  | -2.039157375 | 2.356674816 | -7.751149313 | 1.21E-13 | 6.61E-12  |
| KLHL41 | -2.006218131 | 1.747704271 | -8.475264648 | 8.65E-16 | 7.41E-14  |
| TCAP   | -1.987500609 | 2.124539221 | -7.391254482 | 1.27E-12 | 5.67E-11  |
| TNNI2  | -1.978031216 | 3.067860478 | -7.076794119 | 9.33E-12 | 3.54E-10  |
| ACTN2  | -1.96409005  | 1.689864847 | -8.267665601 | 3.67E-15 | 2.77E-13  |
| TNNC2  | -1.946931665 | 2.425149898 | -7.333329858 | 1.85E-12 | 7.92E-11  |
| ASPN   | -1.900298439 | 3.233258311 | -10.80495697 | 2.05E-23 | 7.91E-21  |
| MYH7   | -1.893619882 | 1.637578315 | -7.821197033 | 7.62E-14 | 4.33E-12  |
| COX6A2 | -1.82701259  | 1.676810991 | -7.888383987 | 4.86E-14 | 2.89E-12  |
| SFRP4  | -1.815331845 | 2.269989888 | -9.01737646  | 1.79E-17 | 2.10E-15  |
| COL6A3 | -1.811637739 | 4.600568023 | -11.20190913 | 8.40E-25 | 4.13E-22  |
| MYBPC2 | -1.803861687 | 1.774118806 | -7.831195549 | 7.13E-14 | 4.07E-12  |
| HSPB7  | -1.797346043 | 1.696874054 | -8.324598461 | 2.48E-15 | 1.94E-13  |
| TNNI1  | -1.787215959 | 2.098950808 | -8.205007236 | 5.66E-15 | 4.16E-13  |
| COMP   | -1.78106329  | 2.011573483 | -9.960158122 | 1.54E-20 | 3.33E-18  |
| COL5A2 | -1.774842075 | 5.128427197 | -11.78799564 | 6.87E-27 | 6.30E-24  |
| MYH1   | -1.751631029 | 1.524554468 | -7.873853345 | 5.36E-14 | 3.14E-12  |
| MMP2   | -1.751002052 | 5.72225295  | -12.6328315  | 5.75E-30 | 1.34E-26  |
| MXRA5  | -1.748846277 | 3.666162745 | -12.20934715 | 2.05E-28 | 3.25E-25  |
| NRAP   | -1.746056296 | 1.402048769 | -7.747207966 | 1.25E-13 | 6.77E-12  |
| ANKRD1 | -1.74057209  | 1.818680689 | -7.750470167 | 1.22E-13 | 6.63E-12  |
| ISLR   | -1.735617748 | 4.090349074 | -10.78528791 | 2.40E-23 | 9.12E-21  |
| F13A1  | -1.729108142 | 2.547164918 | -11.28046183 | 4.44E-25 | 2.33E-22  |
| MFAP4  | -1.72660681  | 2.609953703 | -11.29621562 | 3.90E-25 | 2.09E-22  |
| LRRC15 | -1.720514687 | 2.392335586 | -10.57052307 | 1.32E-22 | 4.22E-20  |
| CASQ2  | -1.70592344  | 1.666244373 | -8.783045596 | 9.75E-17 | 9.90E-15  |
| VCAN   | -1.697902706 | 2.795639198 | -11.50891929 | 6.86E-26 | 4.71E-23  |
| SPARC  | -1.681665493 | 7.637681722 | -12.21836661 | 1.90E-28 | 3.18E-25  |
| COL5A1 | -1.671966355 | 5.109297558 | -11.22650376 | 6.88E-25 | 3.48E-22  |
| SMPX   | -1.669161481 | 1.59777848  | -7.488568478 | 6.80E-13 | 3.18E-11  |

|          |              |             |              |          |          |
|----------|--------------|-------------|--------------|----------|----------|
| COL10A1  | -1.656823258 | 2.388447087 | -9.502753955 | 4.97E-19 | 7.71E-17 |
| MYBPC1   | -1.645836933 | 1.499839274 | -7.243712868 | 3.27E-12 | 1.35E-10 |
| FLNC     | -1.643100497 | 2.469610121 | -8.696166324 | 1.81E-16 | 1.76E-14 |
| HSPB6    | -1.617544673 | 1.938769758 | -7.925098064 | 3.80E-14 | 2.32E-12 |
| COL11A1  | -1.613567042 | 2.069653562 | -9.074804164 | 1.18E-17 | 1.45E-15 |
| AEBP1    | -1.61340136  | 5.539305243 | -10.64392539 | 7.40E-23 | 2.51E-20 |
| FBN1     | -1.6108728   | 2.705588774 | -11.78150501 | 7.25E-27 | 6.36E-24 |
| MMP11    | -1.610232392 | 3.658385306 | -8.293489674 | 3.07E-15 | 2.36E-13 |
| THBS2    | -1.604384355 | 4.524422677 | -9.577685527 | 2.83E-19 | 4.63E-17 |
| EEF1A2   | -1.588876438 | 2.759661732 | -6.751521044 | 6.87E-11 | 2.21E-09 |
| MYOG     | -1.575856531 | 1.45954829  | -8.298784756 | 2.96E-15 | 2.28E-13 |
| MMP1     | -1.574421563 | 7.429077775 | -6.274294108 | 1.14E-09 | 2.96E-08 |
| CTSK     | -1.569180135 | 5.069368544 | -10.49400336 | 2.42E-22 | 7.12E-20 |
| MYOZ1    | -1.566437339 | 1.491762352 | -7.508471148 | 5.97E-13 | 2.85E-11 |
| PDLIM3   | -1.561843886 | 1.958395214 | -9.18199821  | 5.38E-18 | 6.91E-16 |
| HSPB3    | -1.557509587 | 2.150766022 | -8.864859848 | 5.41E-17 | 5.75E-15 |
| TIMP2    | -1.554793631 | 4.753330858 | -12.56045946 | 1.06E-29 | 2.27E-26 |
| STAC3    | -1.553306122 | 2.391337743 | -7.509569315 | 5.93E-13 | 2.83E-11 |
| FBLN2    | -1.552290859 | 4.048513748 | -10.67502609 | 5.78E-23 | 2.02E-20 |
| CTHRC1   | -1.535508901 | 4.207125828 | -9.956915938 | 1.58E-20 | 3.40E-18 |
| SULF1    | -1.533355705 | 3.213660082 | -10.11399541 | 4.71E-21 | 1.11E-18 |
| EMILIN1  | -1.520607934 | 3.321047378 | -10.85714538 | 1.35E-23 | 5.29E-21 |
| ANGPTL2  | -1.50320042  | 3.755809216 | -12.302221   | 9.39E-29 | 1.62E-25 |
| ADAMTS2  | -1.492097971 | 3.197004826 | -11.29421869 | 3.97E-25 | 2.10E-22 |
| NEB      | -1.491208139 | 1.209562436 | -8.752695549 | 1.21E-16 | 1.21E-14 |
| PCOLCE   | -1.473741457 | 3.755306345 | -11.16100118 | 1.17E-24 | 5.60E-22 |
| FHL1     | -1.470432011 | 3.030938064 | -7.652917929 | 2.32E-13 | 1.20E-11 |
| CRYAB    | -1.468467805 | 4.349506457 | -7.53750098  | 4.95E-13 | 2.41E-11 |
| COL6A2   | -1.468386462 | 6.772201156 | -10.26938588 | 1.41E-21 | 3.57E-19 |
| COL6A1   | -1.464317992 | 6.565912145 | -10.28070417 | 1.29E-21 | 3.29E-19 |
| FNDC1    | -1.460435601 | 1.931191658 | -9.833176137 | 4.08E-20 | 7.97E-18 |
| FIBIN    | -1.456942695 | 1.535156285 | -14.07042499 | 2.37E-35 | 3.17E-31 |
| CHRNA1   | -1.450388021 | 1.335901066 | -9.088131377 | 1.07E-17 | 1.33E-15 |
| LUM      | -1.449073064 | 6.142560535 | -9.029117449 | 1.65E-17 | 1.95E-15 |
| COL8A1   | -1.447901181 | 1.803404158 | -12.75920651 | 1.96E-30 | 5.25E-27 |
| LMOD2    | -1.445228432 | 1.134889188 | -8.095855046 | 1.19E-14 | 8.11E-13 |
| CCDC80   | -1.441059766 | 2.389271551 | -12.09909301 | 5.16E-28 | 7.20E-25 |
| MYOT     | -1.435754046 | 1.260514498 | -8.138447997 | 8.93E-15 | 6.26E-13 |
| MGP      | -1.433497227 | 3.182115545 | -9.26504245  | 2.91E-18 | 3.91E-16 |
| APOBEC2  | -1.432778725 | 1.240379722 | -8.070847982 | 1.42E-14 | 9.47E-13 |
| OLFML2B  | -1.429090363 | 3.35521466  | -11.36780087 | 2.18E-25 | 1.28E-22 |
| APOD     | -1.4222237   | 2.257732648 | -8.589195565 | 3.88E-16 | 3.53E-14 |
| TAGLN    | -1.419719224 | 4.412943697 | -9.99158428  | 1.21E-20 | 2.65E-18 |
| BGN      | -1.417930039 | 7.216539068 | -9.676447449 | 1.34E-19 | 2.37E-17 |
| CCN2     | -1.417459057 | 5.370194772 | -9.088427522 | 1.07E-17 | 1.33E-15 |
| DCN      | -1.414991493 | 3.928840907 | -9.92795519  | 1.98E-20 | 4.15E-18 |
| DPT      | -1.412911138 | 2.282874024 | -9.625759705 | 1.97E-19 | 3.35E-17 |
| ADAM12   | -1.412270722 | 2.317096285 | -11.48777392 | 8.16E-26 | 5.46E-23 |
| IGFBP5   | -1.398090226 | 4.307415869 | -7.910194405 | 4.20E-14 | 2.53E-12 |
| THY1     | -1.357669067 | 3.614852289 | -10.45459595 | 3.30E-22 | 9.55E-20 |
| MMP10    | -1.352968663 | 5.080106225 | -4.787890597 | 2.58E-06 | 3.49E-05 |
| SERPINF1 | -1.352821546 | 4.601147172 | -9.183710416 | 5.31E-18 | 6.85E-16 |
| MMP7     | -1.348831839 | 3.101649941 | -6.313535163 | 9.08E-10 | 2.40E-08 |

|            |              |             |              |          |             |
|------------|--------------|-------------|--------------|----------|-------------|
| IGF2       | -1.342981065 | 3.001711897 | -9.607724955 | 2.26E-19 | 3.77E-17    |
| MXRA8      | -1.342586362 | 3.493528061 | -11.18729963 | 9.46E-25 | 4.60E-22    |
| SYNPO2     | -1.342155184 | 1.654205798 | -7.559284859 | 4.29E-13 | 2.12E-11    |
| TPM2       | -1.338290076 | 4.94349412  | -7.729793163 | 1.40E-13 | 7.48E-12    |
| CHI3L1     | -1.33594371  | 3.355695139 | -6.657703214 | 1.21E-10 | 3.73E-09    |
| OLFML3     | -1.334016497 | 3.132984546 | -10.95575915 | 6.13E-24 | 2.61E-21    |
| MYF6       | -1.334004219 | 1.17369794  | -7.733060836 | 1.37E-13 | 7.35E-12    |
| SPOCK1     | -1.329739252 | 1.876864799 | -10.29098116 | 1.19E-21 | 3.06E-19    |
| XIRP2      | -1.327736759 | 0.967792948 | -7.451460979 | 8.64E-13 | 3.96E-11    |
| FMOD       | -1.323062819 | 3.756115607 | -10.80212973 | 2.10E-23 | 8.03E-21    |
| PDGFRB     | -1.322535669 | 3.758613259 | -10.69258208 | 5.03E-23 | 1.78E-20    |
| CHGB       | -1.314688443 | 1.458959772 | -6.527560662 | 2.61E-10 | 7.61E-09    |
| FSTL1      | -1.311222643 | 4.57693567  | -10.68408626 | 5.38E-23 | 1.89E-20    |
| MYL9       | -1.309970958 | 4.748074423 | -9.513634861 | 4.58E-19 | 7.14E-17    |
| MYH3       | -1.305122004 | 1.452780416 | -8.288845915 | 3.17E-15 | 2.42E-13    |
| MMP3       | -1.301016041 | 4.887578896 | -5.21826607  | 3.25E-07 | 5.32E-06    |
| CAVIN4     | -1.298001234 | 1.257839725 | -9.014419986 | 1.83E-17 | 2.14E-15    |
| DIO2       | -1.297434948 | 2.55487389  | -9.6285604   | 1.93E-19 | 3.30E-17    |
| HTRA3      | -1.296576412 | 3.815510178 | -8.844656691 | 6.26E-17 | 6.56E-15    |
| CXCL12     | -1.289704097 | 2.123809868 | -9.92028547  | 2.10E-20 | 4.35E-18    |
| PODN       | -1.289087762 | 1.320166401 | -11.98097592 | 1.38E-27 | 1.51E-24    |
| AC245297.1 | -1.288855775 | 1.567387635 | -8.83454558  | 6.73E-17 | 7.01E-15    |
| SPON1      | -1.28843853  | 1.853320257 | -11.12909605 | 1.52E-24 | 6.99E-22    |
| RARRES2    | -1.286534682 | 3.184143992 | -8.400181889 | 1.46E-15 | 1.20E-13    |
| PRRX1      | -1.27799423  | 2.933872413 | -9.873541585 | 3.00E-20 | 6.01E-18    |
| AMTN       | -1.273492174 | 2.804528297 | -4.36153523  | 1.74E-05 | 0.000195737 |
| FAP        | -1.270127427 | 1.991707668 | -11.99851527 | 1.20E-27 | 1.36E-24    |
| RCN3       | -1.263244265 | 3.877106854 | -8.765933205 | 1.10E-16 | 1.11E-14    |
| CMYA5      | -1.263109618 | 1.105639114 | -8.063436553 | 1.49E-14 | 9.88E-13    |
| GASK1B     | -1.257487287 | 2.096103426 | -13.29784831 | 1.94E-32 | 1.04E-28    |
| TGFB3      | -1.256864956 | 2.845354117 | -11.60615911 | 3.09E-26 | 2.23E-23    |
| HRC        | -1.246534499 | 1.099575412 | -8.11521076  | 1.05E-14 | 7.21E-13    |
| CPXM1      | -1.240638265 | 2.906608143 | -9.618482994 | 2.08E-19 | 3.52E-17    |
| ENO3       | -1.236427623 | 1.554551    | -7.322801369 | 1.98E-12 | 8.41E-11    |
| ANTXR1     | -1.230700506 | 3.623879857 | -11.11967056 | 1.64E-24 | 7.36E-22    |
| CST1       | -1.226527641 | 2.082174125 | -5.218790048 | 3.24E-07 | 5.31E-06    |
| TRDN       | -1.223272033 | 0.937264995 | -8.118530406 | 1.02E-14 | 7.08E-13    |
| GREM1      | -1.213868497 | 2.060631301 | -9.91198438  | 2.23E-20 | 4.60E-18    |
| ACTA2      | -1.213588862 | 4.342228153 | -9.071776971 | 1.21E-17 | 1.47E-15    |
| MEF2C      | -1.211951186 | 1.395532729 | -11.08617635 | 2.14E-24 | 9.57E-22    |
| LRRC17     | -1.210195362 | 1.264265607 | -10.5976953  | 1.07E-22 | 3.54E-20    |
| NNMT       | -1.208353501 | 4.45309744  | -7.458278607 | 8.27E-13 | 3.81E-11    |
| PDGFRL     | -1.206098524 | 1.534288036 | -10.7159159  | 4.18E-23 | 1.50E-20    |
| LAMP5      | -1.19919013  | 1.756605175 | -10.90604892 | 9.14E-24 | 3.71E-21    |
| FILIP1L    | -1.199029693 | 2.330863819 | -12.91502804 | 5.20E-31 | 1.74E-27    |
| PADI2      | -1.197586762 | 1.567191038 | -7.625655563 | 2.78E-13 | 1.41E-11    |
| CA3        | -1.193000502 | 0.989090827 | -8.127833769 | 9.60E-15 | 6.69E-13    |
| PPP1R27    | -1.190844385 | 1.217164822 | -7.052693137 | 1.08E-11 | 4.04E-10    |
| COL12A1    | -1.19001222  | 4.575352651 | -8.023004587 | 1.96E-14 | 1.27E-12    |
| RCAN2      | -1.180525441 | 1.450827871 | -14.85654692 | 2.36E-38 | 6.32E-34    |
| PRELP      | -1.179978169 | 1.372031142 | -9.201555601 | 4.66E-18 | 6.05E-16    |
| TNS1       | -1.178737543 | 2.306966353 | -11.78668227 | 6.95E-27 | 6.30E-24    |
| ELN        | -1.178413749 | 1.646875531 | -8.23072512  | 4.74E-15 | 3.52E-13    |

|           |              |             |              |          |          |
|-----------|--------------|-------------|--------------|----------|----------|
| FABP3     | -1.17539451  | 2.253255162 | -7.467876284 | 7.77E-13 | 3.60E-11 |
| TMEM119   | -1.172965221 | 1.828038531 | -9.482369547 | 5.79E-19 | 8.82E-17 |
| ADAMTS12  | -1.170145958 | 1.587050451 | -11.31408099 | 3.38E-25 | 1.84E-22 |
| SDC2      | -1.167687136 | 2.741875683 | -9.442233021 | 7.81E-19 | 1.16E-16 |
| COL14A1   | -1.165380067 | 1.725068363 | -10.52705439 | 1.87E-22 | 5.84E-20 |
| DACT1     | -1.163428684 | 1.252497926 | -12.65809509 | 4.64E-30 | 1.18E-26 |
| A2M       | -1.16056185  | 4.678329516 | -9.63253522  | 1.87E-19 | 3.22E-17 |
| HSPG2     | -1.15882795  | 3.806957841 | -8.54031983  | 5.47E-16 | 4.81E-14 |
| MYL3      | -1.156676247 | 0.898450489 | -7.411041331 | 1.12E-12 | 5.02E-11 |
| NID1      | -1.155856192 | 3.718863618 | -7.954726197 | 3.11E-14 | 1.93E-12 |
| SCT       | -1.154352706 | 1.318941523 | -9.757304191 | 7.27E-20 | 1.37E-17 |
| ATP1A2    | -1.147754302 | 0.841064442 | -8.475850028 | 8.61E-16 | 7.39E-14 |
| CDH11     | -1.144863913 | 1.972122122 | -9.513994576 | 4.57E-19 | 7.14E-17 |
| TUBA1A    | -1.144703743 | 4.367757839 | -10.52191594 | 1.94E-22 | 6.02E-20 |
| LOXL1     | -1.139868113 | 2.655379594 | -9.877147731 | 2.92E-20 | 5.87E-18 |
| SGCD      | -1.139279886 | 0.874680034 | -13.98083868 | 5.19E-35 | 5.55E-31 |
| DDIT4L    | -1.136675682 | 0.991247405 | -8.445256299 | 1.07E-15 | 8.96E-14 |
| CACNG1    | -1.136431227 | 0.994215977 | -7.927143045 | 3.75E-14 | 2.29E-12 |
| CRISPLD2  | -1.134969256 | 2.708030141 | -11.17330599 | 1.06E-24 | 5.11E-22 |
| S100A1    | -1.127784503 | 1.388610252 | -7.888592093 | 4.86E-14 | 2.89E-12 |
| GPC4      | -1.127366366 | 1.891282349 | -7.935343365 | 3.55E-14 | 2.18E-12 |
| EFEMP2    | -1.124852865 | 2.363707727 | -11.21478719 | 7.57E-25 | 3.75E-22 |
| SGCA      | -1.119605216 | 0.946125551 | -8.927337918 | 3.45E-17 | 3.78E-15 |
| ASB5      | -1.114301154 | 0.872095772 | -8.283213154 | 3.30E-15 | 2.51E-13 |
| TNFAIP6   | -1.112602384 | 2.475809273 | -9.181900187 | 5.38E-18 | 6.91E-16 |
| FBLN5     | -1.108562058 | 1.957515237 | -11.64410375 | 2.26E-26 | 1.66E-23 |
| PXDN      | -1.1076373   | 3.142734991 | -8.167186045 | 7.34E-15 | 5.22E-13 |
| LOXL2     | -1.105758148 | 3.595043723 | -9.022589116 | 1.73E-17 | 2.03E-15 |
| COL8A2    | -1.104913692 | 2.653263727 | -9.450866445 | 7.32E-19 | 1.10E-16 |
| ANXA6     | -1.103898757 | 3.541104318 | -9.751430677 | 7.60E-20 | 1.43E-17 |
| ATP2A1    | -1.103822679 | 1.091952817 | -6.285213783 | 1.07E-09 | 2.80E-08 |
| OMD       | -1.103427215 | 1.032257732 | -10.12043949 | 4.48E-21 | 1.06E-18 |
| DAB2      | -1.100322838 | 2.240302974 | -12.11660043 | 4.46E-28 | 6.45E-25 |
| CHRND     | -1.100084603 | 0.83282902  | -8.307074809 | 2.80E-15 | 2.16E-13 |
| NES       | -1.098870546 | 3.405148121 | -7.680825868 | 1.93E-13 | 1.01E-11 |
| PLPP4     | -1.09677838  | 1.377844571 | -9.926609439 | 2.00E-20 | 4.17E-18 |
| PTGDS     | -1.096559153 | 2.033275018 | -8.323508835 | 2.49E-15 | 1.95E-13 |
| MFAP5     | -1.09388502  | 2.515614604 | -6.250595649 | 1.30E-09 | 3.35E-08 |
| CASQ1     | -1.091882163 | 0.832478534 | -6.835204076 | 4.14E-11 | 1.39E-09 |
| DUSP26    | -1.090266169 | 0.867404184 | -8.160370841 | 7.69E-15 | 5.42E-13 |
| LINC01614 | -1.088504621 | 1.175865284 | -9.010970481 | 1.88E-17 | 2.19E-15 |
| DIRAS1    | -1.088124953 | 1.036288355 | -11.13573209 | 1.44E-24 | 6.69E-22 |
| ADGRA2    | -1.086180852 | 1.818725554 | -11.72524915 | 1.16E-26 | 9.37E-24 |
| GLT8D2    | -1.085830547 | 1.794240042 | -12.61241737 | 6.83E-30 | 1.52E-26 |
| XIRP1     | -1.085617852 | 1.076732242 | -8.006704173 | 2.19E-14 | 1.41E-12 |
| LRRC32    | -1.083320127 | 2.389718862 | -12.32537404 | 7.73E-29 | 1.43E-25 |
| LMOD3     | -1.083261703 | 0.836803712 | -8.042034843 | 1.72E-14 | 1.13E-12 |
| EDIL3     | -1.080760626 | 2.088280214 | -7.979855934 | 2.63E-14 | 1.66E-12 |
| PMEPA1    | -1.077585348 | 4.506108658 | -8.731802255 | 1.41E-16 | 1.40E-14 |
| ITGA7     | -1.073931542 | 1.66783123  | -9.24675712  | 3.34E-18 | 4.42E-16 |
| ITGA11    | -1.071941691 | 1.22820537  | -10.35132564 | 7.43E-22 | 2.01E-19 |
| LTBP2     | -1.067840419 | 3.880383637 | -9.005475714 | 1.96E-17 | 2.26E-15 |
| MYOZ2     | -1.066929048 | 0.820199744 | -7.424929264 | 1.03E-12 | 4.63E-11 |

|            |              |             |              |          |             |
|------------|--------------|-------------|--------------|----------|-------------|
| COLEC12    | -1.065448349 | 1.350767039 | -11.88361911 | 3.11E-27 | 3.03E-24    |
| SHISA4     | -1.065202263 | 2.220503182 | -9.331174859 | 1.79E-18 | 2.49E-16    |
| COL5A3     | -1.061766536 | 3.583597212 | -8.990416277 | 2.18E-17 | 2.49E-15    |
| TNNT1      | -1.061606902 | 4.408801672 | -4.858602314 | 1.85E-06 | 2.59E-05    |
| CREB3L1    | -1.061142524 | 2.078908956 | -8.320826264 | 2.54E-15 | 1.99E-13    |
| CD248      | -1.058756495 | 3.976596307 | -7.610694196 | 3.07E-13 | 1.55E-11    |
| AC080038.1 | -1.05706177  | 4.100966991 | -9.602498314 | 2.35E-19 | 3.89E-17    |
| PMP22      | -1.056944982 | 3.743662151 | -10.26550414 | 1.45E-21 | 3.67E-19    |
| SPARCL1    | -1.055449534 | 3.983566786 | -8.067008487 | 1.45E-14 | 9.69E-13    |
| COX7A1     | -1.050955605 | 2.452310593 | -7.341954867 | 1.75E-12 | 7.54E-11    |
| LIMCH1     | -1.050409239 | 1.543608003 | -10.32447351 | 9.16E-22 | 2.38E-19    |
| LOX        | -1.049838125 | 2.958795159 | -7.323391359 | 1.97E-12 | 8.39E-11    |
| COL15A1    | -1.047099362 | 2.857585313 | -8.277702968 | 3.43E-15 | 2.61E-13    |
| TRIM54     | -1.042960913 | 1.058643326 | -7.114834299 | 7.36E-12 | 2.86E-10    |
| NID2       | -1.042559116 | 1.639374831 | -9.954515391 | 1.61E-20 | 3.45E-18    |
| DDR2       | -1.039348136 | 1.340689347 | -12.84334123 | 9.58E-31 | 2.85E-27    |
| CPQ        | -1.037851696 | 2.244858653 | -11.42604852 | 1.35E-25 | 8.34E-23    |
| ZCCHC24    | -1.031835091 | 2.007205026 | -14.87869452 | 1.94E-38 | 6.32E-34    |
| EPDR1      | -1.030357463 | 1.325247139 | -10.94078142 | 6.92E-24 | 2.87E-21    |
| SPON2      | -1.028979777 | 3.638119209 | -8.797944977 | 8.76E-17 | 9.00E-15    |
| MEDAG      | -1.027210952 | 1.978258126 | -8.784334547 | 9.66E-17 | 9.83E-15    |
| LDB3       | -1.022530658 | 0.81871875  | -7.556748111 | 4.36E-13 | 2.15E-11    |
| CCN4       | -1.021578487 | 1.911203577 | -9.161963873 | 6.23E-18 | 7.86E-16    |
| HTRA1      | -1.021419039 | 6.086871884 | -8.575885935 | 4.26E-16 | 3.85E-14    |
| TPM1       | -1.016403254 | 3.482040681 | -9.034592504 | 1.58E-17 | 1.89E-15    |
| MAP1A      | -1.015400767 | 1.27413876  | -11.44102428 | 1.20E-25 | 7.63E-23    |
| LAMA4      | -1.014578536 | 2.511557488 | -10.34238115 | 7.97E-22 | 2.13E-19    |
| CPE        | -1.013999874 | 3.397798292 | -7.362546396 | 1.53E-12 | 6.71E-11    |
| NMRK2      | -1.013095044 | 0.862330811 | -7.116604909 | 7.28E-12 | 2.84E-10    |
| LHFPL6     | -1.008852779 | 3.245862537 | -11.34701866 | 2.58E-25 | 1.47E-22    |
| CERCAM     | -1.008785073 | 3.518610099 | -9.600475668 | 2.38E-19 | 3.94E-17    |
| MSC        | -1.007106879 | 3.030998831 | -7.492062385 | 6.65E-13 | 3.12E-11    |
| F2RL2      | -1.006234565 | 2.004550656 | -8.191356234 | 6.21E-15 | 4.49E-13    |
| RGS5       | -1.005245977 | 2.147586172 | -8.953554219 | 2.85E-17 | 3.15E-15    |
| MSRB3      | -1.004039191 | 1.669239953 | -11.78719048 | 6.92E-27 | 6.30E-24    |
| CNN1       | -1.002292496 | 1.598271817 | -8.940531334 | 3.13E-17 | 3.45E-15    |
| ZNF469     | -1.000970803 | 1.230538733 | -11.77839851 | 7.44E-27 | 6.43E-24    |
| DPYSL3     | -1.00074798  | 3.459408795 | -6.78001496  | 5.78E-11 | 1.89E-09    |
| F2R        | -0.997554188 | 3.44945297  | -9.46859852  | 6.41E-19 | 9.70E-17    |
| PRUNE2     | -0.996161932 | 0.747540607 | -10.22643884 | 1.97E-21 | 4.88E-19    |
| MYOM3      | -0.996029578 | 1.48275298  | -8.375926493 | 1.73E-15 | 1.39E-13    |
| MMP9       | -0.995617735 | 5.502670123 | -5.317150757 | 1.98E-07 | 3.40E-06    |
| LAMA2      | -0.994124063 | 1.142846151 | -11.66538373 | 1.89E-26 | 1.43E-23    |
| VIM        | -0.99312666  | 6.473265924 | -8.25232697  | 4.08E-15 | 3.07E-13    |
| CCL19      | -0.988505463 | 2.577817681 | -4.881019993 | 1.67E-06 | 2.35E-05    |
| SOD3       | -0.983653745 | 2.195279432 | -9.861308382 | 3.29E-20 | 6.55E-18    |
| HSPB8      | -0.978335456 | 4.347206734 | -5.921334334 | 8.22E-09 | 1.83E-07    |
| MRAS       | -0.978290911 | 1.510702467 | -12.65300903 | 4.84E-30 | 1.18E-26    |
| LYZ        | -0.978030537 | 5.229908556 | -4.483746599 | 1.02E-05 | 0.000121123 |
| SRPX       | -0.977953341 | 2.627701753 | -6.840090464 | 4.02E-11 | 1.36E-09    |
| ADRA2A     | -0.977592669 | 0.895147073 | -11.12458765 | 1.57E-24 | 7.13E-22    |
| SLC24A3    | -0.972175455 | 2.462549667 | -8.283417615 | 3.29E-15 | 2.51E-13    |
| SGCG       | -0.971623447 | 0.808561312 | -8.251129437 | 4.12E-15 | 3.09E-13    |

|          |              |             |              |          |          |
|----------|--------------|-------------|--------------|----------|----------|
| CCN1     | -0.971315902 | 5.129459387 | -7.435969004 | 9.55E-13 | 4.34E-11 |
| SCARF2   | -0.971015817 | 1.653061569 | -10.48016324 | 2.70E-22 | 7.85E-20 |
| FKBP10   | -0.969414333 | 3.884711006 | -6.023411517 | 4.68E-09 | 1.09E-07 |
| INHBA    | -0.967650666 | 3.847344717 | -5.753174515 | 2.05E-08 | 4.22E-07 |
| PLA2G2A  | -0.966440694 | 1.349492293 | -4.86022725  | 1.84E-06 | 2.57E-05 |
| HLA-DQB2 | -0.96581933  | 3.114471363 | -5.513300199 | 7.25E-08 | 1.35E-06 |
| TTN      | -0.965646713 | 0.695357875 | -7.864669594 | 5.70E-14 | 3.32E-12 |
| CCL18    | -0.963985549 | 3.542895955 | -4.771487567 | 2.78E-06 | 3.74E-05 |
| CLEC11A  | -0.963915905 | 2.9540601   | -8.185965161 | 6.45E-15 | 4.66E-13 |
| C3       | -0.963450621 | 3.874137781 | -5.548569547 | 6.04E-08 | 1.15E-06 |
| FBXO32   | -0.960821132 | 3.040198609 | -7.779134501 | 1.01E-13 | 5.58E-12 |
| TNS3     | -0.957489526 | 2.664849801 | -10.19963706 | 2.43E-21 | 5.93E-19 |
| IGFBP4   | -0.95614803  | 6.726975944 | -7.644606318 | 2.45E-13 | 1.26E-11 |
| CILP     | -0.954946608 | 0.611581141 | -10.48760901 | 2.55E-22 | 7.45E-20 |
| GGT5     | -0.954368146 | 2.399752511 | -10.05070118 | 7.69E-21 | 1.74E-18 |
| MYADM    | -0.952755411 | 4.746893184 | -7.078699066 | 9.22E-12 | 3.50E-10 |
| RBM24    | -0.952599756 | 0.772309508 | -9.391907735 | 1.14E-18 | 1.64E-16 |
| CORO6    | -0.952323956 | 1.654104637 | -6.582615727 | 1.89E-10 | 5.62E-09 |
| AQP1     | -0.952079367 | 4.070584068 | -8.986725036 | 2.24E-17 | 2.55E-15 |
| GEM      | -0.949344632 | 2.56935367  | -7.767156237 | 1.09E-13 | 6.00E-12 |
| CCL2     | -0.945431795 | 3.011843425 | -6.793572972 | 5.33E-11 | 1.76E-09 |
| PDZRN3   | -0.945055738 | 1.311460978 | -11.35018941 | 2.51E-25 | 1.45E-22 |
| DYSF     | -0.943888054 | 2.131538437 | -9.729090361 | 9.01E-20 | 1.67E-17 |
| CKMT2    | -0.943306319 | 0.845120809 | -6.996647352 | 1.54E-11 | 5.56E-10 |
| TMEM176B | -0.94286505  | 3.875789097 | -6.632408815 | 1.40E-10 | 4.28E-09 |
| UNC45B   | -0.941644818 | 0.650921326 | -9.072552828 | 1.20E-17 | 1.47E-15 |
| BICC1    | -0.939568201 | 1.207219766 | -12.20858202 | 2.06E-28 | 3.25E-25 |
| NDN      | -0.934847874 | 2.681339221 | -6.439111571 | 4.39E-10 | 1.23E-08 |
| NEXN     | -0.933272727 | 1.939768686 | -7.342827871 | 1.74E-12 | 7.51E-11 |
| FCER1A   | -0.932184958 | 1.435696075 | -7.519504424 | 5.56E-13 | 2.67E-11 |
| SERPING1 | -0.931781838 | 5.436652272 | -6.370482211 | 6.54E-10 | 1.78E-08 |
| SORCS2   | -0.931661382 | 1.961311488 | -8.103872878 | 1.13E-14 | 7.70E-13 |
| PYGM     | -0.929040748 | 0.720299078 | -6.221095195 | 1.54E-09 | 3.92E-08 |
| SYNPO2L  | -0.927238711 | 0.919220149 | -7.656710179 | 2.27E-13 | 1.17E-11 |
| TNC      | -0.925453857 | 6.128528276 | -4.910793321 | 1.45E-06 | 2.07E-05 |
| AGT      | -0.923762206 | 0.991984001 | -8.818626861 | 7.55E-17 | 7.82E-15 |
| FOLR2    | -0.923285984 | 2.228480899 | -7.185567188 | 4.72E-12 | 1.89E-10 |
| TIMP3    | -0.923207863 | 1.239042965 | -10.16625848 | 3.14E-21 | 7.51E-19 |
| CACNA1S  | -0.922470367 | 0.616375743 | -8.388463669 | 1.59E-15 | 1.28E-13 |
| CD207    | -0.91846413  | 1.868616062 | -6.127727556 | 2.61E-09 | 6.35E-08 |
| MYOM1    | -0.918359351 | 0.787267726 | -7.564510171 | 4.15E-13 | 2.05E-11 |
| COL18A1  | -0.916035871 | 4.552647047 | -9.263671721 | 2.94E-18 | 3.94E-16 |
| CALD1    | -0.915465021 | 4.410883256 | -9.479907426 | 5.89E-19 | 8.96E-17 |
| HMCN1    | -0.914762067 | 0.931351883 | -12.006414   | 1.12E-27 | 1.30E-24 |
| TMEM47   | -0.913722529 | 1.399337504 | -11.98681176 | 1.32E-27 | 1.47E-24 |
| PDK4     | -0.912443823 | 1.194015359 | -6.440669995 | 4.35E-10 | 1.22E-08 |
| PDGFRA   | -0.912387758 | 1.528388906 | -8.979128527 | 2.37E-17 | 2.66E-15 |
| RGS16    | -0.912256852 | 2.173344809 | -8.336475336 | 2.28E-15 | 1.80E-13 |
| IGFBP7   | -0.912227962 | 6.503235584 | -9.763659736 | 6.93E-20 | 1.31E-17 |
| HEYL     | -0.908686848 | 1.838376701 | -10.73793219 | 3.50E-23 | 1.28E-20 |
| FZD1     | -0.907241864 | 2.583043299 | -10.24774423 | 1.67E-21 | 4.17E-19 |
| CSPG4    | -0.906314054 | 3.909869064 | -5.492927132 | 8.06E-08 | 1.49E-06 |
| CPXM2    | -0.904532318 | 1.720625477 | -8.104402477 | 1.13E-14 | 7.70E-13 |

|            |              |             |              |          |          |
|------------|--------------|-------------|--------------|----------|----------|
| PKIA       | -0.903741435 | 1.293357434 | -7.417685376 | 1.07E-12 | 4.83E-11 |
| LAMB2      | -0.903310809 | 3.982110097 | -10.87908694 | 1.13E-23 | 4.50E-21 |
| HEG1       | -0.901652223 | 2.968164129 | -9.18633772  | 5.21E-18 | 6.73E-16 |
| P3H3       | -0.897237456 | 2.268132897 | -7.52992063  | 5.20E-13 | 2.52E-11 |
| DEPP1      | -0.895357709 | 3.233391934 | -6.735601872 | 7.56E-11 | 2.42E-09 |
| SMYD1      | -0.895108957 | 0.624824961 | -8.075952444 | 1.37E-14 | 9.21E-13 |
| CYP27A1    | -0.894639663 | 1.92969591  | -6.443628292 | 4.27E-10 | 1.21E-08 |
| TRIM63     | -0.893986679 | 0.897694487 | -6.204320634 | 1.69E-09 | 4.27E-08 |
| PLN        | -0.893436785 | 0.75514086  | -9.105952408 | 9.39E-18 | 1.17E-15 |
| SRL        | -0.891826163 | 0.847549945 | -6.883706733 | 3.08E-11 | 1.06E-09 |
| MYPN       | -0.891804459 | 0.649974061 | -8.066852078 | 1.46E-14 | 9.69E-13 |
| DUSP27     | -0.891633873 | 0.635953053 | -8.380085605 | 1.68E-15 | 1.36E-13 |
| JAM3       | -0.89125898  | 1.64673763  | -11.68238802 | 1.65E-26 | 1.26E-23 |
| ZEB1       | -0.891080969 | 1.365423167 | -13.06931012 | 1.39E-31 | 5.71E-28 |
| SLC40A1    | -0.890574326 | 2.872007512 | -6.795715536 | 5.26E-11 | 1.74E-09 |
| PLXDC2     | -0.888507264 | 2.403505596 | -8.896924377 | 4.29E-17 | 4.63E-15 |
| WNT11      | -0.888388048 | 1.214377376 | -6.910530158 | 2.61E-11 | 9.13E-10 |
| APLNR      | -0.88781792  | 1.902016162 | -8.054241279 | 1.59E-14 | 1.04E-12 |
| SSPN       | -0.886420342 | 1.487460175 | -11.32584662 | 3.07E-25 | 1.70E-22 |
| SSC5D      | -0.886170244 | 0.985665452 | -11.7176996  | 1.23E-26 | 9.82E-24 |
| C11orf96   | -0.884082522 | 2.222554529 | -7.330654746 | 1.88E-12 | 8.02E-11 |
| BHLHE41    | -0.883950062 | 1.94757302  | -7.74234104  | 1.29E-13 | 6.96E-12 |
| SERPINE1   | -0.882942473 | 6.36464232  | -4.835346201 | 2.07E-06 | 2.86E-05 |
| SCN1B      | -0.88146801  | 1.137928727 | -9.60322763  | 2.33E-19 | 3.88E-17 |
| THBS1      | -0.880660318 | 4.68888342  | -5.033953647 | 8.03E-07 | 1.21E-05 |
| LMCD1      | -0.880387269 | 1.513572084 | -11.23137207 | 6.62E-25 | 3.37E-22 |
| OLFML1     | -0.880332879 | 1.193465976 | -12.04524686 | 8.09E-28 | 1.01E-24 |
| AXL        | -0.879882591 | 3.229122939 | -7.004065373 | 1.47E-11 | 5.33E-10 |
| NCAM1      | -0.879772526 | 0.771652539 | -9.362256869 | 1.42E-18 | 2.01E-16 |
| AC093010.3 | -0.878143817 | 1.712777006 | -11.69107071 | 1.53E-26 | 1.19E-23 |
| KLHL40     | -0.87693266  | 0.673756672 | -7.219401173 | 3.81E-12 | 1.55E-10 |
| CSF1R      | -0.876613873 | 2.989809283 | -6.992390844 | 1.58E-11 | 5.69E-10 |
| ALPK3      | -0.876464278 | 0.96031676  | -9.592065235 | 2.54E-19 | 4.18E-17 |
| LRP1       | -0.875850031 | 4.029226916 | -8.839125502 | 6.51E-17 | 6.80E-15 |
| FBLN1      | -0.873445877 | 4.182477699 | -6.74103538  | 7.32E-11 | 2.34E-09 |
| GXYLT2     | -0.873143867 | 1.326883575 | -10.02673767 | 9.25E-21 | 2.04E-18 |
| RGS4       | -0.870775576 | 1.365427184 | -8.395210565 | 1.51E-15 | 1.23E-13 |
| IL1R1      | -0.868815469 | 3.069576374 | -9.175705549 | 5.63E-18 | 7.19E-16 |
| GPC6       | -0.867184322 | 1.045442693 | -9.313599368 | 2.03E-18 | 2.81E-16 |
| PLPP7      | -0.866520966 | 0.965270189 | -10.59756949 | 1.07E-22 | 3.54E-20 |
| ZNF521     | -0.86641377  | 0.91058737  | -13.22384256 | 3.68E-32 | 1.65E-28 |
| AKAP12     | -0.865142554 | 1.309723601 | -9.083182816 | 1.11E-17 | 1.37E-15 |
| GPX7       | -0.862021761 | 2.263960432 | -7.59122768  | 3.48E-13 | 1.74E-11 |
| TMEM204    | -0.861189065 | 2.69456256  | -9.440418216 | 7.92E-19 | 1.17E-16 |
| EGR2       | -0.860492352 | 1.915805287 | -6.824015692 | 4.43E-11 | 1.49E-09 |
| TXLNB      | -0.859205129 | 0.71136391  | -8.569597448 | 4.45E-16 | 4.00E-14 |
| PPP1R3C    | -0.858671161 | 1.712377522 | -5.945206963 | 7.21E-09 | 1.62E-07 |
| MAN1A1     | -0.858363577 | 3.182764856 | -7.697096067 | 1.74E-13 | 9.14E-12 |
| RETREG1    | -0.85675421  | 1.274648345 | -9.6043752   | 2.31E-19 | 3.86E-17 |
| KIF26B     | -0.855337612 | 1.352938641 | -12.09711307 | 5.25E-28 | 7.20E-25 |
| P4HA3      | -0.855146487 | 0.935176426 | -12.14026909 | 3.66E-28 | 5.44E-25 |
| GAS1       | -0.852300326 | 2.890246217 | -7.860890696 | 5.85E-14 | 3.40E-12 |
| RUSC2      | -0.850855493 | 2.041532868 | -11.03858772 | 3.15E-24 | 1.38E-21 |

|          |              |             |              |             |             |
|----------|--------------|-------------|--------------|-------------|-------------|
| SLCO2A1  | -0.84947059  | 2.555427558 | -6.79415735  | 5.31E-11    | 1.75E-09    |
| SMOC2    | -0.848272541 | 1.421272095 | -8.022688718 | 1.97E-14    | 1.27E-12    |
| PKIG     | -0.847370466 | 3.066911997 | -9.82478957  | 4.35E-20    | 8.44E-18    |
| PRSS23   | -0.847225441 | 3.451717274 | -7.148498129 | 5.96E-12    | 2.35E-10    |
| C10orf71 | -0.847118374 | 0.540094322 | -8.104225136 | 1.13E-14    | 7.70E-13    |
| SEMA3C   | -0.846957307 | 3.732229554 | -6.316979185 | 8.90E-10    | 2.36E-08    |
| NPR2     | -0.845076891 | 1.299674567 | -8.885409614 | 4.67E-17    | 5.02E-15    |
| IGLV2-14 | -0.844254949 | 4.434208419 | -2.700748044 | 0.007285856 | 0.037913767 |
| CTSF     | -0.843985505 | 2.934791287 | -7.162173429 | 5.47E-12    | 2.17E-10    |
| FERMT2   | -0.843935029 | 1.574870086 | -10.07782163 | 6.23E-21    | 1.41E-18    |
| APOE     | -0.843748771 | 5.234657455 | -4.391922264 | 1.53E-05    | 0.000174256 |
| ADAM19   | -0.842350616 | 2.313455125 | -7.078636394 | 9.23E-12    | 3.50E-10    |
| ARMCX1   | -0.842239524 | 1.973250243 | -8.083143678 | 1.30E-14    | 8.82E-13    |
| C1QTNF3  | -0.842230873 | 0.750562109 | -9.85386046  | 3.48E-20    | 6.91E-18    |
| ECM2     | -0.842027432 | 1.157390879 | -12.04484844 | 8.12E-28    | 1.01E-24    |
| RAI2     | -0.840748779 | 1.014280309 | -11.06060864 | 2.64E-24    | 1.17E-21    |
| TWIST1   | -0.839910085 | 2.348837336 | -8.953585724 | 2.85E-17    | 3.15E-15    |
| KANK4    | -0.838828573 | 0.936525802 | -8.802522678 | 8.47E-17    | 8.72E-15    |
| TMEM176A | -0.83783563  | 2.407361912 | -7.482640789 | 7.06E-13    | 3.30E-11    |
| ZBTB47   | -0.83735211  | 2.06348319  | -12.02326373 | 9.72E-28    | 1.18E-24    |
| HLA-DQA2 | -0.836729563 | 3.152189511 | -4.21340858  | 3.27E-05    | 0.000343965 |
| TBX15    | -0.836204503 | 1.085174512 | -9.226283419 | 3.88E-18    | 5.10E-16    |
| IP6K3    | -0.835737575 | 0.741429032 | -7.537783027 | 4.94E-13    | 2.41E-11    |
| ARMCX2   | -0.835190114 | 1.518064017 | -8.182186893 | 6.62E-15    | 4.75E-13    |
| ITGA5    | -0.834859303 | 4.540811394 | -6.338099981 | 7.88E-10    | 2.11E-08    |
| MAMDC2   | -0.834008322 | 0.967431371 | -9.391706484 | 1.14E-18    | 1.64E-16    |
| COL4A1   | -0.833032968 | 5.497314909 | -6.700456853 | 9.34E-11    | 2.93E-09    |
| CNN3     | -0.832534855 | 4.967832895 | -8.713240868 | 1.61E-16    | 1.58E-14    |
| HEPH     | -0.831095409 | 1.151586871 | -11.32533201 | 3.08E-25    | 1.70E-22    |
| EFEMP1   | -0.83060787  | 3.935364904 | -6.163725769 | 2.13E-09    | 5.28E-08    |
| CXCL14   | -0.829745959 | 7.464443441 | -3.205944932 | 0.001481816 | 0.00985778  |
| ITGB2    | -0.829740304 | 3.18554353  | -6.070979959 | 3.59E-09    | 8.48E-08    |
| COL16A1  | -0.829632052 | 3.8581359   | -7.850989565 | 6.25E-14    | 3.62E-12    |
| DCHS1    | -0.827159462 | 1.075768753 | -11.21660003 | 7.46E-25    | 3.73E-22    |
| PLPP3    | -0.824775041 | 2.498762634 | -7.608134897 | 3.12E-13    | 1.57E-11    |
| CYS1     | -0.824119571 | 0.956781803 | -12.30561241 | 9.13E-29    | 1.62E-25    |
| FGFR1    | -0.823652015 | 1.681627833 | -9.028961651 | 1.65E-17    | 1.95E-15    |
| BMERB1   | -0.82359854  | 1.260390482 | -14.42500205 | 1.06E-36    | 1.89E-32    |
| SYNPO    | -0.823478553 | 3.834514791 | -8.119591712 | 1.02E-14    | 7.05E-13    |
| TGFBI    | -0.823310595 | 6.447269361 | -4.747571971 | 3.11E-06    | 4.13E-05    |
| CYBRD1   | -0.823310488 | 3.37334321  | -6.558213803 | 2.18E-10    | 6.42E-09    |
| MYO18B   | -0.823088708 | 0.628194822 | -8.558550506 | 4.81E-16    | 4.29E-14    |
| CCL21    | -0.822229408 | 3.81615169  | -3.560368198 | 0.000426403 | 0.003330463 |
| ARHGEF40 | -0.820662385 | 1.908021211 | -9.847225826 | 3.67E-20    | 7.24E-18    |
| NREP     | -0.81980378  | 2.544889868 | -9.174382157 | 5.69E-18    | 7.25E-16    |
| GUCY1A1  | -0.818856323 | 1.537403671 | -8.763080543 | 1.12E-16    | 1.13E-14    |
| MYL4     | -0.818612811 | 0.7100678   | -7.473273751 | 7.51E-13    | 3.49E-11    |
| DDN      | -0.817522315 | 1.151964226 | -5.654964496 | 3.45E-08    | 6.82E-07    |
| CAV3     | -0.815591895 | 0.636610212 | -7.99194947  | 2.42E-14    | 1.54E-12    |
| TSPAN7   | -0.814843986 | 2.317061367 | -4.98679477  | 1.01E-06    | 1.48E-05    |
| CCL22    | -0.814610499 | 2.0209022   | -7.477365865 | 7.31E-13    | 3.41E-11    |
| CH25H    | -0.810306917 | 1.613817198 | -7.205281317 | 4.17E-12    | 1.69E-10    |
| CD93     | -0.809964181 | 2.75259709  | -7.785931075 | 9.64E-14    | 5.35E-12    |



|            |              |             |              |          |          |
|------------|--------------|-------------|--------------|----------|----------|
| PLXDC1     | -0.809852308 | 1.459529735 | -10.97380973 | 5.31E-24 | 2.27E-21 |
| MFAP2      | -0.809828166 | 4.231315599 | -6.771960384 | 6.07E-11 | 1.97E-09 |
| VCAM1      | -0.809336896 | 1.689148805 | -5.426692607 | 1.13E-07 | 2.05E-06 |
| JCAD       | -0.809317733 | 1.31622687  | -11.35661114 | 2.39E-25 | 1.39E-22 |
| BASP1      | -0.809106107 | 5.010405174 | -5.698857205 | 2.73E-08 | 5.52E-07 |
| AC068506.1 | -0.808860623 | 0.58373842  | -7.126461133 | 6.84E-12 | 2.68E-10 |
| C1QTNF1    | -0.807297849 | 3.148788109 | -7.879710839 | 5.15E-14 | 3.05E-12 |
| SULF2      | -0.805748603 | 5.401118638 | -6.169599883 | 2.06E-09 | 5.12E-08 |
| EDNRA      | -0.805563657 | 2.422496283 | -7.786662708 | 9.59E-14 | 5.34E-12 |
| C1S        | -0.804590078 | 5.716144669 | -6.8673545   | 3.40E-11 | 1.16E-09 |
| HJV        | -0.804504229 | 0.578747398 | -7.346232588 | 1.70E-12 | 7.37E-11 |
| AC104083.1 | -0.803953212 | 1.601315439 | -9.421774736 | 9.10E-19 | 1.33E-16 |
| CMTM3      | -0.803408464 | 3.283954259 | -9.202411685 | 4.63E-18 | 6.02E-16 |
| MAGEH1     | -0.803198268 | 2.609791539 | -8.83905424  | 6.52E-17 | 6.80E-15 |
| SLC16A2    | -0.800528822 | 2.377776754 | -6.77373683  | 6.01E-11 | 1.96E-09 |
| LCP1       | -0.798902469 | 4.22372531  | -5.461222698 | 9.49E-08 | 1.74E-06 |
| WNT5B      | -0.798165983 | 1.646265003 | -7.106920235 | 7.73E-12 | 3.00E-10 |
| SYNDIG1    | -0.797591661 | 0.725708958 | -9.408222317 | 1.01E-18 | 1.47E-16 |
| RASA3      | -0.795546852 | 2.243469858 | -9.061018921 | 1.30E-17 | 1.58E-15 |
| TMOD1      | -0.794856089 | 0.916571019 | -7.026562006 | 1.28E-11 | 4.69E-10 |
| ITGAV      | -0.794800694 | 4.591788745 | -6.680722362 | 1.05E-10 | 3.28E-09 |
| SH3BGR     | -0.794713861 | 4.493587664 | -7.872212767 | 5.42E-14 | 3.17E-12 |
| OLFM2      | -0.794090136 | 3.313254021 | -6.022130021 | 4.71E-09 | 1.09E-07 |
| CAP2       | -0.793647465 | 1.881270003 | -8.338764441 | 2.24E-15 | 1.78E-13 |
| SRPX2      | -0.793609863 | 2.808282222 | -7.910617085 | 4.19E-14 | 2.52E-12 |
| CYBB       | -0.791886515 | 2.688996397 | -5.501485601 | 7.71E-08 | 1.43E-06 |
| KLF9       | -0.791202937 | 2.619856231 | -8.065623299 | 1.47E-14 | 9.75E-13 |
| HLA-DQA1   | -0.790885532 | 3.394880039 | -4.851428606 | 1.92E-06 | 2.67E-05 |
| GLIS2      | -0.788836537 | 2.381086913 | -8.701329093 | 1.75E-16 | 1.71E-14 |
| WNT2       | -0.788709067 | 1.144781578 | -7.680287636 | 1.94E-13 | 1.01E-11 |
| MRGPRF     | -0.788708275 | 1.486305863 | -9.287796852 | 2.46E-18 | 3.34E-16 |
| LPL        | -0.788553008 | 1.086587632 | -8.252939525 | 4.07E-15 | 3.06E-13 |
| CD4        | -0.786056611 | 2.985083894 | -6.120281063 | 2.72E-09 | 6.59E-08 |
| RAPSN      | -0.785431393 | 0.765315434 | -8.336711409 | 2.28E-15 | 1.80E-13 |
| TGFBR2     | -0.78462974  | 3.990312587 | -6.965452714 | 1.86E-11 | 6.65E-10 |
| AC005747.1 | -0.783782613 | 1.640092238 | -8.722774891 | 1.50E-16 | 1.48E-14 |
| EVA1A      | -0.782636927 | 1.975269772 | -6.393295368 | 5.73E-10 | 1.58E-08 |
| ADAMTS14   | -0.782254187 | 1.393375917 | -10.57796368 | 1.25E-22 | 4.02E-20 |
| PLXNC1     | -0.781754893 | 1.321671805 | -9.930825259 | 1.93E-20 | 4.07E-18 |
| VSTM4      | -0.781723372 | 1.191113347 | -9.51832726  | 4.42E-19 | 6.94E-17 |
| COL4A2     | -0.779735969 | 5.663872496 | -6.845711629 | 3.88E-11 | 1.31E-09 |
| KDEL3      | -0.779539427 | 3.211376761 | -7.313189785 | 2.10E-12 | 8.88E-11 |
| AOC3       | -0.779282092 | 1.177857077 | -10.50872195 | 2.16E-22 | 6.52E-20 |
| CLIP3      | -0.778800166 | 1.405599484 | -8.545641068 | 5.27E-16 | 4.66E-14 |
| GRP        | -0.777862453 | 0.895074371 | -7.096232785 | 8.27E-12 | 3.19E-10 |
| GALNT15    | -0.776670376 | 0.952400185 | -9.923639121 | 2.04E-20 | 4.25E-18 |
| SH3BGR     | -0.77488349  | 1.370913767 | -7.160325731 | 5.53E-12 | 2.19E-10 |
| WIPF1      | -0.773371455 | 2.321413533 | -8.388849311 | 1.58E-15 | 1.28E-13 |
| CD1A       | -0.771452339 | 1.645483242 | -6.113460604 | 2.83E-09 | 6.80E-08 |
| TGM2       | -0.771328503 | 3.066776024 | -4.801284943 | 2.42E-06 | 3.30E-05 |
| SELENOP    | -0.769280389 | 2.407525188 | -4.659428283 | 4.65E-06 | 5.97E-05 |
| ACKR1      | -0.768723986 | 1.726384926 | -5.199975867 | 3.56E-07 | 5.79E-06 |
| LMOD1      | -0.768626751 | 1.006487251 | -9.801524967 | 5.19E-20 | 1.00E-17 |

|            |              |             |              |          |             |
|------------|--------------|-------------|--------------|----------|-------------|
| NTM        | -0.76820237  | 1.128706067 | -10.7178721  | 4.11E-23 | 1.49E-20    |
| CCN5       | -0.765848905 | 0.634315287 | -8.695444619 | 1.82E-16 | 1.77E-14    |
| GPX3       | -0.765690482 | 3.830070782 | -4.342806346 | 1.89E-05 | 0.000210108 |
| PECAM1     | -0.764855859 | 3.272847756 | -7.392421118 | 1.26E-12 | 5.63E-11    |
| AC084880.1 | -0.763996177 | 1.655257584 | -6.4310156   | 4.60E-10 | 1.29E-08    |
| SYPL2      | -0.762821742 | 0.55804305  | -8.399251674 | 1.47E-15 | 1.20E-13    |
| MLLT11     | -0.761184065 | 2.007878073 | -6.467086935 | 3.73E-10 | 1.06E-08    |
| TPSB2      | -0.760992734 | 2.239457541 | -5.182478482 | 3.88E-07 | 6.27E-06    |
| SNRPN      | -0.760563386 | 2.367712284 | -6.693956031 | 9.72E-11 | 3.05E-09    |
| KCNE4      | -0.759755495 | 1.077951398 | -11.70648946 | 1.35E-26 | 1.06E-23    |
| RYR1       | -0.759541569 | 1.668343666 | -5.733549092 | 2.27E-08 | 4.64E-07    |
| PAPSS2     | -0.759398059 | 2.032521279 | -7.5484742   | 4.61E-13 | 2.26E-11    |
| ID4        | -0.758931653 | 1.925043012 | -7.066307769 | 9.96E-12 | 3.75E-10    |
| NUAK1      | -0.757734153 | 2.121009429 | -7.338786929 | 1.78E-12 | 7.69E-11    |
| KLHL30     | -0.757272793 | 0.703655237 | -8.272110644 | 3.56E-15 | 2.70E-13    |
| NRP1       | -0.756320578 | 2.622792125 | -8.433007882 | 1.16E-15 | 9.70E-14    |
| GPRC5B     | -0.755695882 | 1.35041509  | -7.921101027 | 3.90E-14 | 2.37E-12    |
| PTPRM      | -0.755248454 | 1.335441238 | -12.05390941 | 7.53E-28 | 9.83E-25    |
| SELE       | -0.755111313 | 1.285440554 | -6.029685347 | 4.52E-09 | 1.05E-07    |
| JAM2       | -0.755063469 | 0.89051436  | -13.8039094  | 2.43E-34 | 1.87E-30    |
| TSHZ3      | -0.754838316 | 1.823139697 | -9.335787662 | 1.73E-18 | 2.42E-16    |
| KCNJ8      | -0.752446246 | 1.466334758 | -10.36763973 | 6.54E-22 | 1.79E-19    |
| CWH43      | -0.749834572 | 1.881301934 | -4.034066792 | 6.86E-05 | 0.000665011 |
| ADAMTS7    | -0.749832343 | 1.166020368 | -11.78242128 | 7.20E-27 | 6.36E-24    |
| ALOX5      | -0.7498076   | 1.769471961 | -7.921809518 | 3.88E-14 | 2.37E-12    |
| JSRP1      | -0.749140275 | 1.167711301 | -6.375920296 | 6.33E-10 | 1.73E-08    |
| SERPINA1   | -0.748251745 | 2.743784315 | -5.295984622 | 2.20E-07 | 3.74E-06    |
| FBXL7      | -0.747236892 | 1.084872457 | -10.3256565  | 9.08E-22 | 2.37E-19    |
| PBXIP1     | -0.746924821 | 4.380277382 | -9.982789196 | 1.30E-20 | 2.82E-18    |
| MFGE8      | -0.743543643 | 3.896863578 | -9.376512401 | 1.28E-18 | 1.82E-16    |
| RHOBTB1    | -0.741533208 | 1.43119973  | -11.37134355 | 2.12E-25 | 1.26E-22    |
| DUSP13     | -0.741290607 | 0.702133291 | -7.11327659  | 7.43E-12 | 2.89E-10    |
| JPH2       | -0.741170119 | 1.056711464 | -7.210994979 | 4.02E-12 | 1.63E-10    |
| ITGBL1     | -0.741161933 | 0.694472006 | -8.790364473 | 9.25E-17 | 9.48E-15    |
| CLMP       | -0.74010484  | 2.453799196 | -5.957505395 | 6.74E-09 | 1.52E-07    |
| SCG2       | -0.739981904 | 0.79268418  | -8.451214017 | 1.02E-15 | 8.63E-14    |
| RHOBTB3    | -0.739206898 | 1.614717978 | -8.057056758 | 1.56E-14 | 1.03E-12    |
| S1PR1      | -0.737603354 | 1.890127726 | -8.682813346 | 1.99E-16 | 1.92E-14    |
| MMP14      | -0.737237912 | 6.966853484 | -8.308520725 | 2.77E-15 | 2.15E-13    |
| PAM        | -0.736956878 | 3.787172979 | -9.777968225 | 6.21E-20 | 1.19E-17    |
| MRC1       | -0.736850318 | 1.791806191 | -5.791687467 | 1.66E-08 | 3.50E-07    |
| KANK2      | -0.736555373 | 2.400905061 | -10.1389188  | 3.89E-21 | 9.24E-19    |
| BIN1       | -0.735682438 | 3.031669546 | -6.202837905 | 1.71E-09 | 4.31E-08    |
| LTBP1      | -0.734256912 | 4.398325407 | -5.154004319 | 4.47E-07 | 7.10E-06    |
| GJA1       | -0.734178429 | 7.171656077 | -4.948987868 | 1.21E-06 | 1.76E-05    |
| HHATL      | -0.73305404  | 0.530104423 | -7.190693591 | 4.57E-12 | 1.84E-10    |
| STRIT1     | -0.731744752 | 0.539262731 | -5.939557398 | 7.43E-09 | 1.67E-07    |
| PALM       | -0.73122952  | 1.277018477 | -7.198983949 | 4.34E-12 | 1.75E-10    |
| CXCR4      | -0.731145362 | 3.479668628 | -5.039121512 | 7.83E-07 | 1.18E-05    |
| HLA-DPB1   | -0.730599503 | 5.471261986 | -4.359999345 | 1.75E-05 | 0.000196914 |
| VASH1      | -0.730027876 | 1.68140461  | -10.19313262 | 2.55E-21 | 6.21E-19    |
| RAMP1      | -0.729804074 | 2.791749828 | -4.422791969 | 1.34E-05 | 0.000154262 |
| MME        | -0.729297515 | 1.295712307 | -5.966425265 | 6.41E-09 | 1.45E-07    |

|          |              |             |              |          |             |
|----------|--------------|-------------|--------------|----------|-------------|
| TAFA5    | -0.729273325 | 0.869856579 | -9.285609033 | 2.50E-18 | 3.38E-16    |
| ENG      | -0.727576857 | 4.280786643 | -7.562875267 | 4.19E-13 | 2.07E-11    |
| CDH2     | -0.726366234 | 0.734031672 | -7.874105325 | 5.35E-14 | 3.14E-12    |
| CYP1B1   | -0.725924541 | 1.288640207 | -5.410737651 | 1.23E-07 | 2.21E-06    |
| MEGF6    | -0.723759622 | 2.069997538 | -7.217904967 | 3.85E-12 | 1.56E-10    |
| SMTNL2   | -0.722922521 | 0.638288767 | -6.149540392 | 2.31E-09 | 5.67E-08    |
| ARHGEF6  | -0.722408526 | 1.344221335 | -9.684617676 | 1.26E-19 | 2.26E-17    |
| SLC2A10  | -0.722222501 | 1.230755164 | -8.574523964 | 4.30E-16 | 3.88E-14    |
| CHRNG    | -0.721964857 | 0.526357641 | -8.473977799 | 8.73E-16 | 7.45E-14    |
| SPRY1    | -0.720860651 | 2.324612681 | -9.069000597 | 1.23E-17 | 1.50E-15    |
| PTGIS    | -0.720048334 | 0.693760758 | -7.412437168 | 1.11E-12 | 4.98E-11    |
| CYP7B1   | -0.71993177  | 1.390001987 | -7.819984123 | 7.68E-14 | 4.36E-12    |
| LAPTM5   | -0.719219204 | 5.020125912 | -5.071541664 | 6.69E-07 | 1.03E-05    |
| DAAM2    | -0.719209797 | 0.834281784 | -12.81459134 | 1.22E-30 | 3.45E-27    |
| FAM20A   | -0.717956897 | 1.69843697  | -7.020337312 | 1.33E-11 | 4.85E-10    |
| CFI      | -0.717602478 | 1.896608064 | -5.923524467 | 8.12E-09 | 1.81E-07    |
| ARHGAP31 | -0.717079924 | 1.464928997 | -9.527288271 | 4.13E-19 | 6.58E-17    |
| ACHE     | -0.716717004 | 0.928611128 | -6.905692633 | 2.69E-11 | 9.38E-10    |
| SORBS1   | -0.716553977 | 0.807763046 | -10.58961578 | 1.14E-22 | 3.69E-20    |
| CACNB1   | -0.716502914 | 1.118563446 | -7.393905651 | 1.25E-12 | 5.58E-11    |
| WIPI1    | -0.716310387 | 2.946371669 | -8.645938175 | 2.59E-16 | 2.45E-14    |
| ITM2A    | -0.715622227 | 1.929535923 | -6.619704055 | 1.51E-10 | 4.59E-09    |
| MYH8     | -0.714196307 | 0.487596006 | -7.978844281 | 2.64E-14 | 1.67E-12    |
| SEMA6C   | -0.714067295 | 1.197975693 | -7.905887064 | 4.32E-14 | 2.60E-12    |
| PHLDB1   | -0.713992552 | 1.475812767 | -10.86360846 | 1.28E-23 | 5.06E-21    |
| TXNIP    | -0.713664636 | 5.65793607  | -4.509827171 | 9.11E-06 | 0.000109285 |
| AOC1     | -0.713533946 | 1.083865229 | -7.777393139 | 1.02E-13 | 5.64E-12    |
| FKBP7    | -0.71334686  | 1.473162021 | -9.769733818 | 6.62E-20 | 1.26E-17    |
| SLIT3    | -0.712809075 | 1.081970298 | -8.168739948 | 7.26E-15 | 5.17E-13    |
| PAMR1    | -0.712386828 | 1.215091145 | -7.026287912 | 1.28E-11 | 4.69E-10    |
| ADAMTS4  | -0.712159452 | 1.716720686 | -7.839695981 | 6.74E-14 | 3.88E-12    |
| EPHA3    | -0.712053043 | 0.580554741 | -12.18403745 | 2.53E-28 | 3.88E-25    |
| ENPP2    | -0.7116152   | 1.351716847 | -8.315914419 | 2.63E-15 | 2.04E-13    |
| PTP4A3   | -0.710681726 | 3.057598694 | -5.688563282 | 2.89E-08 | 5.79E-07    |
| CCDC3    | -0.70970486  | 2.93702046  | -5.532882881 | 6.55E-08 | 1.23E-06    |
| HSPB2    | -0.708304097 | 0.914875926 | -7.792193884 | 9.25E-14 | 5.16E-12    |
| TSPAN2   | -0.708202693 | 0.942599945 | -9.482958091 | 5.76E-19 | 8.81E-17    |
| TOX2     | -0.707617724 | 1.800069215 | -6.593072069 | 1.77E-10 | 5.32E-09    |
| ITGB6    | -0.706410142 | 4.20761362  | -4.472692161 | 1.07E-05 | 0.000126581 |
| RASSF2   | -0.705745487 | 1.648986379 | -7.83556592  | 6.93E-14 | 3.96E-12    |
| TIMP1    | -0.705399687 | 6.514318076 | -5.049987159 | 7.43E-07 | 1.13E-05    |
| SNTB1    | -0.705352869 | 1.186279284 | -11.44154831 | 1.19E-25 | 7.63E-23    |
| PDE4B    | -0.705136784 | 1.389897975 | -7.551544141 | 4.51E-13 | 2.22E-11    |
| GPR183   | -0.704581477 | 2.579861279 | -6.108609267 | 2.91E-09 | 6.98E-08    |
| TCF4     | -0.702856801 | 1.680657585 | -9.937602463 | 1.84E-20 | 3.88E-18    |
| SPTB     | -0.702796737 | 0.643865441 | -7.165555183 | 5.35E-12 | 2.13E-10    |
| SH3PXD2B | -0.702751397 | 3.409987292 | -8.381502227 | 1.67E-15 | 1.35E-13    |
| ANTXR2   | -0.702366851 | 2.059637981 | -6.911402666 | 2.60E-11 | 9.09E-10    |
| PLPP1    | -0.702323209 | 3.086641526 | -8.600463257 | 3.58E-16 | 3.28E-14    |
| RAB3IL1  | -0.7016297   | 1.777898558 | -8.880401403 | 4.84E-17 | 5.16E-15    |
| GYPC     | -0.700194681 | 1.703077586 | -7.938656108 | 3.47E-14 | 2.14E-12    |
| MAP1B    | -0.699521867 | 1.712304905 | -6.570038009 | 2.03E-10 | 6.02E-09    |
| FGD5     | -0.699140648 | 1.212579134 | -10.49479403 | 2.41E-22 | 7.12E-20    |

|          |              |             |              |             |             |
|----------|--------------|-------------|--------------|-------------|-------------|
| RHOJ     | -0.699015217 | 1.31868074  | -10.9303442  | 7.52E-24    | 3.10E-21    |
| HLA-DPA1 | -0.696264539 | 4.614651119 | -3.863033291 | 0.000135509 | 0.00121801  |
| DLC1     | -0.695257346 | 1.185701187 | -10.65266052 | 6.90E-23    | 2.37E-20    |
| ABI3BP   | -0.695256477 | 0.653997078 | -9.026961013 | 1.67E-17    | 1.97E-15    |
| FPR3     | -0.694400685 | 2.610993404 | -5.231839768 | 3.04E-07    | 5.00E-06    |
| SYT11    | -0.694025526 | 1.381738714 | -10.32793374 | 8.92E-22    | 2.34E-19    |
| CDH5     | -0.691295007 | 1.944029015 | -8.077683749 | 1.35E-14    | 9.14E-13    |
| ARSI     | -0.688629574 | 3.283233462 | -4.866064699 | 1.79E-06    | 2.51E-05    |
| CPA3     | -0.688461369 | 2.07460146  | -4.720046137 | 3.53E-06    | 4.63E-05    |
| C1QTNF6  | -0.688166962 | 2.734186835 | -6.797360557 | 5.21E-11    | 1.72E-09    |
| MYLK     | -0.687543426 | 1.786756333 | -7.520282892 | 5.53E-13    | 2.66E-11    |
| GPX8     | -0.687164502 | 2.725519347 | -7.940418665 | 3.43E-14    | 2.12E-12    |
| GUCY1B1  | -0.686667466 | 1.651400671 | -7.40977419  | 1.13E-12    | 5.06E-11    |
| PRKG1    | -0.686659941 | 0.957005361 | -11.73657713 | 1.05E-26    | 8.80E-24    |
| GPNMB    | -0.684516749 | 6.29619135  | -3.958518025 | 9.29E-05    | 0.00087054  |
| TNFSF12  | -0.683545172 | 2.393161171 | -8.6022082   | 3.54E-16    | 3.25E-14    |
| SHISAL1  | -0.682893432 | 1.481412614 | -6.15209647  | 2.28E-09    | 5.60E-08    |
| CCL11    | -0.682590796 | 1.451296711 | -5.295091756 | 2.21E-07    | 3.75E-06    |
| ANPEP    | -0.681716411 | 2.530736726 | -6.542145246 | 2.40E-10    | 7.03E-09    |
| AMPD1    | -0.680706473 | 0.517741841 | -6.800558142 | 5.11E-11    | 1.69E-09    |
| ITGB5    | -0.679683013 | 4.799256195 | -8.461687311 | 9.51E-16    | 8.10E-14    |
| RARRES1  | -0.67965876  | 1.923210659 | -4.418033151 | 1.36E-05    | 0.000157158 |
| PLEK     | -0.679552059 | 2.432423511 | -4.912824115 | 1.43E-06    | 2.05E-05    |
| XYLT1    | -0.679349636 | 1.23612842  | -7.997215255 | 2.34E-14    | 1.49E-12    |
| QPCT     | -0.678853364 | 1.457876667 | -7.983144596 | 2.57E-14    | 1.63E-12    |
| CACNG6   | -0.678810839 | 0.499402021 | -7.8812279   | 5.10E-14    | 3.02E-12    |
| OGN      | -0.678394905 | 0.49503078  | -8.610090533 | 3.34E-16    | 3.10E-14    |
| EML1     | -0.67835754  | 1.513611161 | -8.484313264 | 8.12E-16    | 7.00E-14    |
| SMARCA1  | -0.677514823 | 2.600600185 | -5.601160005 | 4.58E-08    | 8.86E-07    |
| CALHM2   | -0.676403764 | 2.192955108 | -8.602184901 | 3.54E-16    | 3.25E-14    |
| RRAD     | -0.676311473 | 4.392275594 | -2.930864268 | 0.003622933 | 0.021110505 |
| TPSAB1   | -0.676185524 | 2.338420341 | -4.934960097 | 1.29E-06    | 1.86E-05    |
| VGLL3    | -0.675912181 | 0.880640838 | -9.245289821 | 3.37E-18    | 4.46E-16    |
| TCEAL7   | -0.675290757 | 0.798821966 | -10.95369925 | 6.24E-24    | 2.63E-21    |
| SYNC     | -0.674529257 | 0.968651379 | -10.25955598 | 1.52E-21    | 3.82E-19    |
| GFPT2    | -0.671922963 | 2.169864034 | -6.157682971 | 2.21E-09    | 5.44E-08    |
| ISM1     | -0.671547022 | 1.225121857 | -7.849522279 | 6.31E-14    | 3.65E-12    |
| APBB1    | -0.67117055  | 1.2185953   | -9.290870005 | 2.41E-18    | 3.27E-16    |
| ACTG2    | -0.670270877 | 1.134615163 | -6.262117894 | 1.22E-09    | 3.15E-08    |
| SFRP1    | -0.670050814 | 2.436188965 | -3.27277774  | 0.00118108  | 0.008115228 |
| FITM1    | -0.669630422 | 0.73912567  | -6.39133325  | 5.79E-10    | 1.59E-08    |
| ETS1     | -0.669507253 | 3.664924252 | -6.544863317 | 2.36E-10    | 6.93E-09    |
| CD53     | -0.669275049 | 3.344195255 | -4.82597664  | 2.16E-06    | 2.97E-05    |
| RASD2    | -0.6691893   | 1.236501331 | -6.063881098 | 3.73E-09    | 8.80E-08    |
| ATP8B2   | -0.669086145 | 1.917819796 | -7.370751153 | 1.45E-12    | 6.41E-11    |
| CLSTN2   | -0.668837728 | 0.54373242  | -10.49753431 | 2.35E-22    | 7.00E-20    |
| TGFB1I1  | -0.668804998 | 2.257478839 | -8.245296319 | 4.29E-15    | 3.20E-13    |
| SLCO2B1  | -0.668463103 | 1.690532133 | -6.372284813 | 6.47E-10    | 1.76E-08    |
| LAMB1    | -0.668397993 | 4.474007429 | -6.7081883   | 8.92E-11    | 2.81E-09    |
| LTB      | -0.668346909 | 2.325430138 | -5.689545818 | 2.87E-08    | 5.77E-07    |
| DCLK1    | -0.668272622 | 0.540385583 | -10.65335158 | 6.87E-23    | 2.37E-20    |
| FYN      | -0.668222807 | 2.00794796  | -9.402166388 | 1.05E-18    | 1.53E-16    |
| SYDE1    | -0.6681655   | 1.983670195 | -8.889269625 | 4.54E-17    | 4.89E-15    |

|            |              |             |              |             |             |
|------------|--------------|-------------|--------------|-------------|-------------|
| PDE4DIP    | -0.666528178 | 1.356273794 | -8.420682691 | 1.27E-15    | 1.05E-13    |
| SLC2A5     | -0.666115271 | 1.122320392 | -8.373788823 | 1.76E-15    | 1.40E-13    |
| DKK3       | -0.664879182 | 4.378280355 | -5.280341616 | 2.38E-07    | 4.01E-06    |
| CTSO       | -0.664838709 | 2.85039283  | -6.84938125  | 3.80E-11    | 1.29E-09    |
| SPI1       | -0.664467886 | 3.180746648 | -5.579820576 | 5.13E-08    | 9.85E-07    |
| ADA2       | -0.664127346 | 2.309788092 | -5.185040434 | 3.83E-07    | 6.20E-06    |
| VWF        | -0.663250516 | 3.369587802 | -6.019480915 | 4.78E-09    | 1.11E-07    |
| PI16       | -0.662646026 | 0.653531275 | -5.270341602 | 2.51E-07    | 4.19E-06    |
| DMPK       | -0.662522493 | 2.555226157 | -6.307748188 | 9.39E-10    | 2.48E-08    |
| P3H1       | -0.662212199 | 2.875013255 | -8.027365933 | 1.90E-14    | 1.24E-12    |
| TNFRSF19   | -0.661512194 | 1.485987211 | -6.965385783 | 1.86E-11    | 6.65E-10    |
| COL22A1    | -0.660796037 | 1.399695433 | -4.270664018 | 2.57E-05    | 0.000275946 |
| PTPRC      | -0.659760514 | 1.985748313 | -5.194747394 | 3.65E-07    | 5.93E-06    |
| SESN3      | -0.659701748 | 3.300669631 | -5.257446731 | 2.67E-07    | 4.46E-06    |
| PCDH18     | -0.659521106 | 0.992148861 | -10.2031814  | 2.36E-21    | 5.79E-19    |
| CLEC14A    | -0.658859234 | 2.24213569  | -8.048306697 | 1.65E-14    | 1.08E-12    |
| PAPLN      | -0.65876122  | 1.912733476 | -6.635356141 | 1.38E-10    | 4.22E-09    |
| NFATC4     | -0.657997569 | 1.364678164 | -9.651475977 | 1.62E-19    | 2.81E-17    |
| CD163      | -0.656964177 | 2.31225209  | -4.479962043 | 1.04E-05    | 0.000122998 |
| LPXN       | -0.656445616 | 2.598813404 | -6.278923143 | 1.11E-09    | 2.89E-08    |
| RAI14      | -0.656163727 | 3.206959171 | -6.041519203 | 4.23E-09    | 9.88E-08    |
| CHRD       | -0.65611236  | 0.653063684 | -13.69494473 | 6.26E-34    | 4.19E-30    |
| TIE1       | -0.655788209 | 1.642680773 | -8.834256369 | 6.75E-17    | 7.01E-15    |
| BARX1      | -0.655302171 | 1.677280477 | -4.466668174 | 1.10E-05    | 0.000129382 |
| AC015922.2 | -0.654653742 | 1.218468892 | -6.654985094 | 1.23E-10    | 3.78E-09    |
| PIK3R1     | -0.654037589 | 2.088421423 | -7.305322771 | 2.21E-12    | 9.33E-11    |
| FBP1       | -0.653901656 | 2.08722639  | -3.973302937 | 8.76E-05    | 0.000825434 |
| ST6GAL1    | -0.653829329 | 1.723665306 | -6.046106042 | 4.12E-09    | 9.66E-08    |
| ZEB2       | -0.65178503  | 0.930161755 | -11.91988379 | 2.30E-27    | 2.32E-24    |
| NTN4       | -0.650278902 | 1.961389864 | -7.002324679 | 1.48E-11    | 5.38E-10    |
| LXN        | -0.650199273 | 1.945583782 | -6.265828444 | 1.19E-09    | 3.09E-08    |
| SLC2A3     | -0.649311317 | 2.326908142 | -5.359889787 | 1.59E-07    | 2.79E-06    |
| FRZB       | -0.648591154 | 0.785352831 | -8.862450883 | 5.51E-17    | 5.82E-15    |
| IL7R       | -0.648239023 | 2.740979403 | -4.880903357 | 1.67E-06    | 2.35E-05    |
| ARHGEF25   | -0.648159808 | 1.446869969 | -8.055881033 | 1.57E-14    | 1.03E-12    |
| IGHV4-31   | -0.647479661 | 2.406746223 | -2.663780796 | 0.008117123 | 0.041339404 |
| CTSS       | -0.647302902 | 3.616492291 | -4.44517348  | 1.21E-05    | 0.000140978 |
| NAPSB      | -0.647067419 | 1.766685929 | -5.670880475 | 3.17E-08    | 6.31E-07    |
| ITGB1      | -0.646912081 | 5.591019116 | -5.249214153 | 2.79E-07    | 4.63E-06    |
| GJA4       | -0.646903892 | 1.865995103 | -7.334608877 | 1.83E-12    | 7.88E-11    |
| RNASE1     | -0.646562521 | 5.156524799 | -4.939889073 | 1.26E-06    | 1.82E-05    |
| CELF2      | -0.646294968 | 1.268791048 | -8.157371148 | 7.85E-15    | 5.52E-13    |
| LRRC39     | -0.64595164  | 0.648292095 | -7.535845803 | 5.00E-13    | 2.43E-11    |
| PROS1      | -0.64587039  | 2.310628998 | -5.38938148  | 1.37E-07    | 2.44E-06    |
| HSPA12B    | -0.645653093 | 1.144517329 | -10.53107598 | 1.81E-22    | 5.69E-20    |
| STARD13    | -0.645012938 | 1.355483644 | -10.57197828 | 1.31E-22    | 4.19E-20    |
| SH3RF3     | -0.645000268 | 1.378647624 | -9.616221863 | 2.12E-19    | 3.57E-17    |
| TNS2       | -0.644145275 | 1.765170328 | -9.181047366 | 5.41E-18    | 6.93E-16    |
| MNDA       | -0.644088508 | 1.95503678  | -5.824949736 | 1.39E-08    | 2.96E-07    |
| EVI2B      | -0.643855516 | 2.051388753 | -5.698128506 | 2.74E-08    | 5.54E-07    |
| MEOX2      | -0.643337389 | 0.53032832  | -11.94693322 | 1.84E-27    | 1.93E-24    |
| TMEM45A    | -0.64321953  | 3.871338524 | -3.934389365 | 0.00010229  | 0.000951105 |
| IL32       | -0.643200085 | 4.494740289 | -4.343627469 | 1.88E-05    | 0.000209498 |

|            |              |             |              |             |             |
|------------|--------------|-------------|--------------|-------------|-------------|
| TRAC       | -0.642018202 | 3.152461967 | -4.37291261  | 1.66E-05    | 0.000187492 |
| MYLK2      | -0.640158298 | 0.551110876 | -7.499646145 | 6.33E-13    | 2.99E-11    |
| VSIG4      | -0.639673998 | 2.015572113 | -4.412646666 | 1.40E-05    | 0.00016051  |
| HLA-DRA    | -0.639290947 | 8.225891008 | -3.520408592 | 0.000493277 | 0.003785854 |
| TGFB2      | -0.638604419 | 1.48091405  | -6.817695176 | 4.60E-11    | 1.54E-09    |
| FGL2       | -0.638152862 | 2.209951376 | -4.74172615  | 3.19E-06    | 4.23E-05    |
| LBH        | -0.637860546 | 3.647605204 | -5.821746056 | 1.41E-08    | 3.00E-07    |
| PLVAP      | -0.636996553 | 4.893291865 | -7.052799439 | 1.08E-11    | 4.04E-10    |
| ITGA1      | -0.636647251 | 1.416708306 | -9.714823398 | 1.00E-19    | 1.83E-17    |
| LDOC1      | -0.636132241 | 2.355221757 | -3.678149893 | 0.000275413 | 0.002271453 |
| IGFL3      | -0.634984706 | 1.445244965 | -3.455563046 | 0.000623069 | 0.004644257 |
| MEIS3      | -0.634578601 | 1.18827438  | -8.694317731 | 1.84E-16    | 1.78E-14    |
| RASL12     | -0.634147528 | 1.112491652 | -9.999177138 | 1.14E-20    | 2.51E-18    |
| CD52       | -0.634017764 | 3.411663559 | -4.303343475 | 2.24E-05    | 0.000244188 |
| CDK14      | -0.633742751 | 1.588487496 | -6.925673437 | 2.38E-11    | 8.40E-10    |
| SGCB       | -0.633708658 | 2.671469814 | -8.171365963 | 7.13E-15    | 5.09E-13    |
| RUNX2      | -0.633660538 | 1.533508956 | -9.391879782 | 1.14E-18    | 1.64E-16    |
| C1QC       | -0.63349106  | 5.808010446 | -3.663315572 | 0.000291184 | 0.002384627 |
| CALU       | -0.63317346  | 5.400403467 | -7.336075809 | 1.81E-12    | 7.81E-11    |
| LZTS1      | -0.632991791 | 1.216593392 | -8.391665322 | 1.55E-15    | 1.26E-13    |
| TLR4       | -0.632735036 | 1.121644091 | -7.716377055 | 1.53E-13    | 8.13E-12    |
| MOCS1      | -0.632245164 | 1.424997384 | -9.676238713 | 1.34E-19    | 2.37E-17    |
| SELL       | -0.631593454 | 1.741899859 | -5.200867598 | 3.54E-07    | 5.77E-06    |
| CCL13      | -0.631406321 | 1.983680347 | -4.44501835  | 1.21E-05    | 0.000141043 |
| ACKR3      | -0.631254165 | 4.717493706 | -4.159086583 | 4.11E-05    | 0.000421122 |
| LTBP3      | -0.6307781   | 2.516648478 | -6.595061802 | 1.75E-10    | 5.27E-09    |
| MAGED1     | -0.630648094 | 4.260719542 | -5.572974524 | 5.31E-08    | 1.02E-06    |
| PLAC9      | -0.630409649 | 1.143531016 | -7.732101526 | 1.38E-13    | 7.38E-12    |
| PLXND1     | -0.629700326 | 2.942730352 | -7.39951974  | 1.21E-12    | 5.39E-11    |
| KCTD12     | -0.628881078 | 3.222124019 | -6.974058863 | 1.77E-11    | 6.33E-10    |
| SYT7       | -0.627833263 | 2.17150929  | -4.953313796 | 1.18E-06    | 1.72E-05    |
| CFH        | -0.626724182 | 2.972369133 | -5.261684705 | 2.62E-07    | 4.37E-06    |
| G0S2       | -0.626146343 | 3.11485751  | -3.520012163 | 0.000493987 | 0.003790303 |
| MICAL2     | -0.625745831 | 2.395828306 | -6.344850434 | 7.58E-10    | 2.04E-08    |
| GALNT10    | -0.625219362 | 2.489262205 | -9.041477059 | 1.50E-17    | 1.81E-15    |
| BOC        | -0.624328457 | 1.030857387 | -9.645386603 | 1.70E-19    | 2.93E-17    |
| AC134312.5 | -0.623915643 | 0.826797456 | -9.74306063  | 8.10E-20    | 1.51E-17    |
| ALDH1B1    | -0.623900883 | 2.932383948 | -5.541916355 | 6.25E-08    | 1.18E-06    |
| C3orf80    | -0.623609457 | 0.758815573 | -11.535328   | 5.52E-26    | 3.84E-23    |
| TENM3      | -0.623412207 | 1.623624159 | -6.265583621 | 1.20E-09    | 3.09E-08    |
| EGFL6      | -0.62331866  | 2.091642405 | -5.246738937 | 2.82E-07    | 4.68E-06    |
| CST6       | -0.623100848 | 3.89001795  | -3.105126272 | 0.002071655 | 0.013135204 |
| TYROBP     | -0.622926421 | 4.8583544   | -4.296766715 | 2.30E-05    | 0.000249963 |
| ESAM       | -0.622116725 | 2.524767632 | -8.604909778 | 3.47E-16    | 3.20E-14    |
| PCDHGC3    | -0.621600735 | 2.61591081  | -4.849117    | 1.94E-06    | 2.70E-05    |
| SYNM       | -0.620235841 | 1.70810157  | -5.376303217 | 1.47E-07    | 2.58E-06    |
| CRTAC1     | -0.617459518 | 0.559379021 | -7.334429758 | 1.83E-12    | 7.88E-11    |
| SNAI1      | -0.616888923 | 1.812798244 | -7.242468482 | 3.29E-12    | 1.36E-10    |
| RASSF4     | -0.616235536 | 1.480664566 | -7.776846019 | 1.02E-13    | 5.66E-12    |
| EVC        | -0.616176498 | 2.017886183 | -7.779708401 | 1.00E-13    | 5.57E-12    |
| ANOS1      | -0.616134211 | 1.065221154 | -8.057299293 | 1.55E-14    | 1.03E-12    |
| SCARA5     | -0.615952665 | 0.857561846 | -7.077327463 | 9.30E-12    | 3.53E-10    |
| SERPINH1   | -0.615820841 | 5.952261942 | -5.673024989 | 3.14E-08    | 6.24E-07    |

|           |              |             |              |             |             |
|-----------|--------------|-------------|--------------|-------------|-------------|
| ENC1      | -0.615602119 | 2.430596283 | -6.610113701 | 1.60E-10    | 4.83E-09    |
| BMF       | -0.61395059  | 1.716684036 | -8.396986933 | 1.50E-15    | 1.22E-13    |
| HLA-DOA   | -0.613911746 | 2.089049585 | -4.267048968 | 2.61E-05    | 0.000279648 |
| CHRDL1    | -0.613455332 | 0.549160264 | -6.519768895 | 2.74E-10    | 7.93E-09    |
| SLC39A14  | -0.612706353 | 3.447535992 | -5.860754879 | 1.14E-08    | 2.47E-07    |
| PDGFC     | -0.612685503 | 2.297253543 | -6.139451565 | 2.45E-09    | 5.98E-08    |
| IGFBP3    | -0.61234309  | 5.276687168 | -3.542279259 | 0.000455547 | 0.003524152 |
| CACNA2D1  | -0.612295777 | 1.10286241  | -6.162432115 | 2.15E-09    | 5.31E-08    |
| PDGFB     | -0.611439892 | 2.61071303  | -6.538435123 | 2.45E-10    | 7.18E-09    |
| CDHR1     | -0.611058952 | 1.863590296 | -4.413623397 | 1.39E-05    | 0.000159966 |
| INHBB     | -0.610040616 | 1.792492503 | -5.254880235 | 2.71E-07    | 4.51E-06    |
| PODNL1    | -0.609920572 | 1.868867886 | -7.128315364 | 6.76E-12    | 2.65E-10    |
| SELP      | -0.609582104 | 0.918416396 | -6.489554947 | 3.27E-10    | 9.38E-09    |
| TSPAN11   | -0.608957913 | 1.325798968 | -6.585947384 | 1.85E-10    | 5.53E-09    |
| IFITM2    | -0.607950481 | 4.764165389 | -5.156136975 | 4.42E-07    | 7.04E-06    |
| CD34      | -0.607568653 | 1.775177582 | -8.510459777 | 6.76E-16    | 5.87E-14    |
| OLR1      | -0.606332352 | 1.531744224 | -4.406260458 | 1.44E-05    | 0.000164645 |
| CXXC5     | -0.605928242 | 2.953878998 | -7.269426119 | 2.78E-12    | 1.16E-10    |
| TRIM55    | -0.605923551 | 0.432429152 | -8.987212509 | 2.23E-17    | 2.55E-15    |
| CTSH      | -0.605856581 | 3.6170012   | -5.637174626 | 3.79E-08    | 7.43E-07    |
| SLITRK6   | -0.605726868 | 1.986417743 | -3.832909847 | 0.0001524   | 0.001352797 |
| MMP19     | -0.605687524 | 1.814638467 | -6.634045289 | 1.39E-10    | 4.25E-09    |
| LDLRAD4   | -0.605407989 | 0.774740287 | -11.86855522 | 3.52E-27    | 3.37E-24    |
| KLF2      | -0.604951748 | 2.329652894 | -6.342363276 | 7.69E-10    | 2.06E-08    |
| S100B     | -0.604620808 | 2.257798396 | -5.033082812 | 8.06E-07    | 1.21E-05    |
| MPEG1     | -0.604584231 | 2.244882203 | -4.633737731 | 5.23E-06    | 6.62E-05    |
| CD1C      | -0.603276528 | 0.989655399 | -8.332346133 | 2.35E-15    | 1.85E-13    |
| DEPTOR    | -0.60302154  | 1.51171443  | -5.525563968 | 6.81E-08    | 1.28E-06    |
| RFLNB     | -0.602531724 | 2.813017661 | -6.730087153 | 7.82E-11    | 2.49E-09    |
| SELPLG    | -0.602480277 | 2.855664998 | -5.462534972 | 9.43E-08    | 1.73E-06    |
| LRRN1     | -0.602463487 | 0.648992105 | -6.205091636 | 1.69E-09    | 4.26E-08    |
| ARHGEF17  | -0.602391543 | 1.973946978 | -8.075973796 | 1.37E-14    | 9.21E-13    |
| MYOM2     | -0.601937308 | 0.714963722 | -6.080114763 | 3.41E-09    | 8.09E-08    |
| MIR635    | -0.601289147 | 2.133755915 | -7.191103892 | 4.56E-12    | 1.83E-10    |
| SLAMF8    | -0.599405879 | 2.332983399 | -5.168943316 | 4.15E-07    | 6.66E-06    |
| TWIST2    | -0.59929531  | 2.116418937 | -5.877754917 | 1.04E-08    | 2.27E-07    |
| MN1       | -0.598972908 | 2.481421201 | -5.870050868 | 1.09E-08    | 2.36E-07    |
| TRPV2     | -0.598799702 | 2.038572832 | -6.616127544 | 1.55E-10    | 4.68E-09    |
| CDH13     | -0.598653018 | 2.529915331 | -5.423704045 | 1.15E-07    | 2.08E-06    |
| DOK5      | -0.597288968 | 0.531649004 | -11.23412344 | 6.47E-25    | 3.33E-22    |
| BNC2      | -0.597145907 | 0.477300318 | -12.34380776 | 6.62E-29    | 1.27E-25    |
| LAMC1     | -0.596431268 | 4.741902452 | -6.4128816   | 5.11E-10    | 1.42E-08    |
| ARMCX3    | -0.596248766 | 2.450002518 | -5.367196129 | 1.54E-07    | 2.70E-06    |
| H6PD      | -0.596064948 | 3.159183092 | -7.594013946 | 3.42E-13    | 1.71E-11    |
| HCK       | -0.595951066 | 2.761637955 | -5.538026471 | 6.38E-08    | 1.20E-06    |
| CNRIP1    | -0.595705457 | 1.014587058 | -10.09064249 | 5.65E-21    | 1.30E-18    |
| C1R       | -0.595650285 | 5.782469241 | -5.886158872 | 9.96E-09    | 2.18E-07    |
| ABCC9     | -0.595403196 | 0.569069677 | -12.54883185 | 1.17E-29    | 2.41E-26    |
| CSGALNACT | -0.594817001 | 2.935511475 | -8.161098311 | 7.65E-15    | 5.40E-13    |
| SEMA5A    | -0.594808157 | 1.256095172 | -6.365238125 | 6.74E-10    | 1.83E-08    |
| ACVRL1    | -0.59465262  | 1.868638415 | -8.48395514  | 8.14E-16    | 7.00E-14    |
| STAB1     | -0.594186835 | 2.238033437 | -6.177318553 | 1.97E-09    | 4.92E-08    |
| FCGR3A    | -0.594090069 | 3.31996856  | -3.638947249 | 0.00031895  | 0.002579653 |

|          |              |             |              |          |             |
|----------|--------------|-------------|--------------|----------|-------------|
| CHIT1    | -0.593721533 | 0.846349887 | -4.265176455 | 2.63E-05 | 0.000281547 |
| EHD3     | -0.593695803 | 2.394655609 | -6.785136135 | 5.61E-11 | 1.84E-09    |
| ABLIM2   | -0.593417851 | 1.77947988  | -5.759266427 | 1.98E-08 | 4.10E-07    |
| PGM2L1   | -0.592601101 | 1.336830805 | -7.528428674 | 5.25E-13 | 2.54E-11    |
| UBE2QL1  | -0.592374321 | 0.751658263 | -8.423077759 | 1.25E-15 | 1.04E-13    |
| CYYR1    | -0.591758796 | 1.774241312 | -7.501222739 | 6.26E-13 | 2.97E-11    |
| SGCE     | -0.591685837 | 1.71178178  | -5.141798776 | 4.74E-07 | 7.50E-06    |
| ICAM1    | -0.591551806 | 4.180014287 | -4.264310691 | 2.64E-05 | 0.000282354 |
| BMP1     | -0.590857097 | 3.665081334 | -7.974926089 | 2.72E-14 | 1.71E-12    |
| NATD1    | -0.590854034 | 1.906766037 | -9.303112106 | 2.20E-18 | 3.03E-16    |
| SORT1    | -0.590290561 | 2.912952102 | -5.928365448 | 7.91E-09 | 1.77E-07    |
| RHOQ     | -0.58987967  | 2.897851803 | -9.205970939 | 4.51E-18 | 5.88E-16    |
| CCDC92   | -0.589210618 | 2.177192201 | -9.340655285 | 1.66E-18 | 2.34E-16    |
| SELENOM  | -0.588487968 | 3.433435658 | -4.589320017 | 6.39E-06 | 7.92E-05    |
| CLEC3B   | -0.588003491 | 1.396814678 | -6.541695116 | 2.40E-10 | 7.05E-09    |
| ANKH     | -0.587164638 | 2.918939984 | -6.689492933 | 9.98E-11 | 3.12E-09    |
| FAM171A1 | -0.58688     | 1.469617832 | -5.002351273 | 9.35E-07 | 1.39E-05    |
| MS4A6A   | -0.586542018 | 2.060590851 | -5.201126169 | 3.54E-07 | 5.77E-06    |
| ENDOD1   | -0.586365412 | 4.225228952 | -6.775428704 | 5.95E-11 | 1.94E-09    |
| MTURN    | -0.586289851 | 1.970106057 | -7.657781732 | 2.25E-13 | 1.16E-11    |
| ZNF423   | -0.586167542 | 0.527124981 | -13.80320241 | 2.44E-34 | 1.87E-30    |
| LHFPL2   | -0.585796455 | 2.561464453 | -7.938506065 | 3.47E-14 | 2.14E-12    |
| JAK1     | -0.58535326  | 4.664864295 | -8.777948203 | 1.01E-16 | 1.02E-14    |
| ST3GAL2  | -0.58496622  | 1.636070221 | -10.32857669 | 8.87E-22 | 2.34E-19    |
| IRF8     | -0.584833471 | 1.47459137  | -5.810746659 | 1.50E-08 | 3.18E-07    |
| CREB3L2  | -0.584687309 | 2.963769989 | -7.833008924 | 7.04E-14 | 4.03E-12    |
| GNG11    | -0.58437949  | 2.301159741 | -7.127423844 | 6.80E-12 | 2.66E-10    |
| AKT3     | -0.584137516 | 1.401922288 | -7.097162588 | 8.22E-12 | 3.18E-10    |
| PALLD    | -0.583039252 | 4.468981069 | -7.043619197 | 1.15E-11 | 4.26E-10    |
| CHI3L2   | -0.582032463 | 1.580017713 | -4.216060924 | 3.24E-05 | 0.000340357 |
| ADGRF5   | -0.581894404 | 1.57400303  | -7.875161878 | 5.31E-14 | 3.12E-12    |
| RECK     | -0.581833183 | 0.898128785 | -11.42578069 | 1.36E-25 | 8.34E-23    |
| ADAMTS1  | -0.581260206 | 2.469749147 | -4.663636061 | 4.57E-06 | 5.86E-05    |
| NOX4     | -0.581259311 | 0.828894424 | -10.7434301  | 3.35E-23 | 1.24E-20    |
| CCR7     | -0.581234354 | 1.420485931 | -5.350292301 | 1.67E-07 | 2.92E-06    |
| EVI2A    | -0.581094154 | 1.542040044 | -6.49593371  | 3.15E-10 | 9.05E-09    |
| TMEM38A  | -0.580908797 | 1.498855676 | -4.611324688 | 5.79E-06 | 7.23E-05    |
| GPSM3    | -0.580618274 | 3.024271483 | -5.732287532 | 2.29E-08 | 4.67E-07    |
| LGALS1   | -0.580229078 | 8.175953921 | -4.195904777 | 3.52E-05 | 0.000366678 |
| MAPRE3   | -0.580142392 | 2.342555416 | -5.712947648 | 2.54E-08 | 5.15E-07    |
| SNHG25   | 0.5812132    | 1.425524006 | 5.66753892   | 3.23E-08 | 6.41E-07    |
| PPIH     | 0.582399869  | 4.139530309 | 7.908435277  | 4.25E-14 | 2.56E-12    |
| ATP5MC3  | 0.582752725  | 4.743175611 | 7.8894628    | 4.83E-14 | 2.87E-12    |
| UQCRH    | 0.583498548  | 6.226047959 | 8.527554644  | 5.99E-16 | 5.26E-14    |
| STAP2    | 0.583999847  | 4.460107295 | 6.847913147  | 3.83E-11 | 1.30E-09    |
| KIF18B   | 0.586822945  | 2.386642944 | 7.629836052  | 2.70E-13 | 1.37E-11    |
| CENPU    | 0.587096587  | 2.949470973 | 6.493080893  | 3.20E-10 | 9.20E-09    |
| POLE2    | 0.587198322  | 1.778239738 | 9.615332944  | 2.13E-19 | 3.59E-17    |
| C1QBP    | 0.587291036  | 5.344760249 | 8.787286588  | 9.45E-17 | 9.66E-15    |
| EXO1     | 0.58755266   | 2.046394058 | 8.445194084  | 1.07E-15 | 8.96E-14    |
| UPP1     | 0.587802946  | 4.536063882 | 4.43136643   | 1.29E-05 | 0.000148979 |
| TACC3    | 0.588410963  | 3.450488307 | 7.828029891  | 7.28E-14 | 4.15E-12    |
| EIF4EBP1 | 0.588526551  | 5.968803654 | 5.388487961  | 1.38E-07 | 2.45E-06    |



|          |             |             |             |             |             |
|----------|-------------|-------------|-------------|-------------|-------------|
| CSTB     | 0.590252746 | 8.199766351 | 3.847417981 | 0.00014403  | 0.001286182 |
| AKR1C3   | 0.591232502 | 3.02535788  | 2.598014949 | 0.009809094 | 0.048186632 |
| NCAPG    | 0.592924471 | 2.64301564  | 8.503896807 | 7.07E-16    | 6.12E-14    |
| VRK1     | 0.593567642 | 3.008192739 | 8.986550365 | 2.24E-17    | 2.55E-15    |
| CENPA    | 0.594625515 | 2.628397263 | 8.074342695 | 1.38E-14    | 9.27E-13    |
| RPL39L   | 0.59484899  | 3.367790337 | 3.231503434 | 0.001359291 | 0.009162245 |
| FOXM1    | 0.595035444 | 3.814007766 | 5.794637947 | 1.64E-08    | 3.44E-07    |
| DCTPP1   | 0.597007626 | 4.562988506 | 7.901255557 | 4.46E-14    | 2.67E-12    |
| RPL36A   | 0.597956944 | 3.919530307 | 6.177285358 | 1.97E-09    | 4.92E-08    |
| RPL36    | 0.598337032 | 7.271492233 | 6.202671521 | 1.71E-09    | 4.31E-08    |
| ARHGEF16 | 0.598942363 | 2.529971048 | 5.928406476 | 7.90E-09    | 1.77E-07    |
| CDCA3    | 0.599763134 | 2.032099235 | 8.462552231 | 9.46E-16    | 8.06E-14    |
| MIS18A   | 0.600265706 | 3.011059761 | 9.200113028 | 4.71E-18    | 6.10E-16    |
| CENPM    | 0.602674843 | 2.798353889 | 6.543258763 | 2.38E-10    | 6.99E-09    |
| BUB1B    | 0.605141325 | 2.54761528  | 7.725738865 | 1.44E-13    | 7.66E-12    |
| POC1A    | 0.60582152  | 2.567657942 | 8.629001598 | 2.92E-16    | 2.72E-14    |
| SPC25    | 0.606331831 | 2.332832727 | 8.747791541 | 1.25E-16    | 1.25E-14    |
| LMNB2    | 0.607704991 | 5.070440249 | 8.498109894 | 7.37E-16    | 6.36E-14    |
| CCDC58   | 0.610990747 | 3.093922059 | 8.697997842 | 1.79E-16    | 1.74E-14    |
| NME1     | 0.613386769 | 4.2219881   | 8.333948429 | 2.32E-15    | 1.83E-13    |
| NOP16    | 0.613503958 | 3.527198303 | 9.539484347 | 3.77E-19    | 6.04E-17    |
| CENPH    | 0.613820425 | 2.594229516 | 7.643182343 | 2.48E-13    | 1.27E-11    |
| LMNB1    | 0.613931681 | 3.844491636 | 6.485988629 | 3.34E-10    | 9.57E-09    |
| ANXA1    | 0.614048744 | 8.076870934 | 4.217100292 | 3.22E-05    | 0.000339008 |
| DLGAP5   | 0.615273427 | 3.169975374 | 7.816086789 | 7.89E-14    | 4.46E-12    |
| SCD      | 0.620041554 | 6.035614585 | 4.443446829 | 1.22E-05    | 0.000141832 |
| KIF11    | 0.620336867 | 3.312619592 | 8.134728393 | 9.16E-15    | 6.39E-13    |
| IL36G    | 0.620816718 | 4.149385257 | 2.596383669 | 0.009854807 | 0.048349076 |
| COA6     | 0.62210119  | 4.116493431 | 7.710113475 | 1.59E-13    | 8.44E-12    |
| MRPL11   | 0.622206359 | 4.148433666 | 7.428443532 | 1.00E-12    | 4.53E-11    |
| MRPL21   | 0.623008345 | 3.829470557 | 5.819647556 | 1.43E-08    | 3.04E-07    |
| RPL35    | 0.623696668 | 8.379754627 | 6.901455625 | 2.76E-11    | 9.59E-10    |
| ZMYND19  | 0.624209765 | 3.658467996 | 8.959476688 | 2.73E-17    | 3.03E-15    |
| SNRPG    | 0.627600287 | 4.588739638 | 9.023728384 | 1.71E-17    | 2.01E-15    |
| HSPD1    | 0.628858879 | 6.137192935 | 8.604962101 | 3.47E-16    | 3.20E-14    |
| AURKA    | 0.629612578 | 3.457639302 | 7.707573213 | 1.62E-13    | 8.57E-12    |
| PAICS    | 0.629791058 | 4.262859704 | 10.0446724  | 8.05E-21    | 1.80E-18    |
| SLIRP    | 0.62992306  | 3.774419093 | 8.114894391 | 1.05E-14    | 7.21E-13    |
| ATP5MC1  | 0.631484505 | 4.582163606 | 8.452984407 | 1.01E-15    | 8.55E-14    |
| CRB3     | 0.633800425 | 3.232909979 | 6.321910873 | 8.65E-10    | 2.30E-08    |
| TOMM40   | 0.634176807 | 4.669486814 | 10.59726892 | 1.07E-22    | 3.54E-20    |
| SNRPGP2  | 0.634654638 | 3.437335038 | 9.080952654 | 1.13E-17    | 1.39E-15    |
| ELF3     | 0.636618585 | 3.279766785 | 3.629942311 | 0.000329827 | 0.002657984 |
| FKBP4    | 0.637641554 | 5.264523779 | 8.410136895 | 1.36E-15    | 1.13E-13    |
| TRIP13   | 0.639971213 | 3.052595685 | 7.078547628 | 9.23E-12    | 3.50E-10    |
| TXN      | 0.639978311 | 8.146705775 | 6.33028682  | 8.24E-10    | 2.20E-08    |
| TKT      | 0.640557031 | 5.106804815 | 7.74089294  | 1.30E-13    | 7.02E-12    |
| GAS5     | 0.641089074 | 4.499654535 | 5.487897583 | 8.27E-08    | 1.53E-06    |
| NUF2     | 0.64237361  | 2.260796715 | 7.705738632 | 1.64E-13    | 8.66E-12    |
| KPNA2    | 0.643063441 | 5.808945329 | 9.719634862 | 9.68E-20    | 1.77E-17    |
| FXYD3    | 0.643658516 | 6.745985258 | 4.934687134 | 1.29E-06    | 1.87E-05    |
| SNRPE    | 0.643853269 | 4.771748455 | 8.411568744 | 1.35E-15    | 1.12E-13    |
| FAM83D   | 0.643932921 | 3.983064363 | 6.584211831 | 1.87E-10    | 5.58E-09    |

|            |             |             |             |             |             |
|------------|-------------|-------------|-------------|-------------|-------------|
| NUDT1      | 0.644546925 | 3.766186645 | 7.35089022  | 1.65E-12    | 7.17E-11    |
| TUBB4B     | 0.645269688 | 8.068785214 | 9.163390062 | 6.16E-18    | 7.80E-16    |
| MRPL12     | 0.647211024 | 4.833998076 | 7.205138459 | 4.17E-12    | 1.69E-10    |
| GIN51      | 0.648404124 | 2.720332516 | 8.753708713 | 1.20E-16    | 1.20E-14    |
| LINC01133  | 0.649029587 | 2.130617447 | 3.766927387 | 0.000196609 | 0.001694366 |
| ANP32B     | 0.649667782 | 6.671496461 | 9.967868371 | 1.45E-20    | 3.15E-18    |
| AC105460.1 | 0.649729801 | 2.108758732 | 2.597640811 | 0.009819561 | 0.048211506 |
| KIF22      | 0.65106634  | 3.943496507 | 10.08347634 | 5.97E-21    | 1.37E-18    |
| NMRAL2P    | 0.651859964 | 1.437713293 | 3.757701603 | 0.000203679 | 0.001746299 |
| SLC25A10   | 0.653750511 | 2.735390015 | 7.651627109 | 2.34E-13    | 1.21E-11    |
| H2AFX      | 0.653847694 | 5.110740939 | 7.225360609 | 3.67E-12    | 1.50E-10    |
| E2F1       | 0.653872179 | 3.011899695 | 6.517049956 | 2.78E-10    | 8.05E-09    |
| FANCI      | 0.653978541 | 2.85631218  | 8.881852047 | 4.79E-17    | 5.13E-15    |
| SPAG5      | 0.654952216 | 2.79054521  | 8.590339783 | 3.84E-16    | 3.51E-14    |
| SNHG1      | 0.655364088 | 3.258280977 | 6.290979209 | 1.03E-09    | 2.71E-08    |
| ODC1       | 0.65636114  | 5.986271678 | 3.552775723 | 0.000438416 | 0.003405936 |
| FBL        | 0.656362133 | 5.969235282 | 7.762819457 | 1.12E-13    | 6.17E-12    |
| SNRPD1     | 0.658988142 | 3.60878967  | 9.888227692 | 2.68E-20    | 5.43E-18    |
| OIP5       | 0.660041742 | 2.106972532 | 8.649620893 | 2.53E-16    | 2.40E-14    |
| C17orf53   | 0.660126005 | 1.885356342 | 9.522305028 | 4.29E-19    | 6.75E-17    |
| NUDT8      | 0.661522594 | 3.104746494 | 6.328658265 | 8.32E-10    | 2.22E-08    |
| CDCA2      | 0.661569184 | 2.070624389 | 9.061077725 | 1.30E-17    | 1.58E-15    |
| AC010503.4 | 0.662486537 | 3.073804716 | 5.954417324 | 6.85E-09    | 1.55E-07    |
| SURF2      | 0.662643048 | 4.494908063 | 8.199412149 | 5.88E-15    | 4.29E-13    |
| DTL        | 0.662840715 | 2.421054493 | 8.204873685 | 5.66E-15    | 4.16E-13    |
| GGCT       | 0.664242402 | 4.836869846 | 9.827583975 | 4.26E-20    | 8.29E-18    |
| SKA3       | 0.6651      | 2.306887677 | 10.08164666 | 6.05E-21    | 1.38E-18    |
| SNHG15     | 0.66520658  | 2.901246173 | 7.354061262 | 1.62E-12    | 7.05E-11    |
| RMI2       | 0.665553552 | 2.786033845 | 6.990728303 | 1.59E-11    | 5.75E-10    |
| C16orf74   | 0.665583228 | 3.295916724 | 7.030226561 | 1.25E-11    | 4.60E-10    |
| TYMS       | 0.665900148 | 3.553540302 | 6.925835997 | 2.38E-11    | 8.40E-10    |
| F12        | 0.667112745 | 2.681827595 | 7.447859026 | 8.85E-13    | 4.05E-11    |
| ZIC2       | 0.667123449 | 1.344307538 | 6.621612449 | 1.50E-10    | 4.55E-09    |
| CEP55      | 0.668985434 | 3.814558984 | 7.648205596 | 2.40E-13    | 1.23E-11    |
| CDKN3      | 0.672041157 | 3.210555643 | 8.181880127 | 6.63E-15    | 4.75E-13    |
| SNHG19     | 0.672169669 | 4.019365041 | 4.53164414  | 8.27E-06    | 0.000100047 |
| SERPINB1   | 0.672611755 | 6.284715783 | 5.108267376 | 5.59E-07    | 8.73E-06    |
| RECQL4     | 0.679198918 | 2.979833396 | 7.1702192   | 5.20E-12    | 2.07E-10    |
| MAD2L1     | 0.679801667 | 2.502732334 | 8.914037198 | 3.79E-17    | 4.14E-15    |
| ADH7       | 0.680557944 | 2.349435171 | 2.681236678 | 0.007714517 | 0.039689277 |
| GSTA1      | 0.680799116 | 1.012663964 | 3.157063782 | 0.001745077 | 0.011353713 |
| TK1        | 0.681473645 | 5.774547594 | 7.169148184 | 5.23E-12    | 2.08E-10    |
| MND1       | 0.682224386 | 1.851752574 | 9.012947048 | 1.85E-17    | 2.16E-15    |
| WDR34      | 0.683113258 | 4.543600728 | 6.90442429  | 2.71E-11    | 9.45E-10    |
| FEN1       | 0.683484539 | 4.448045572 | 8.803409213 | 8.42E-17    | 8.68E-15    |
| PCNA       | 0.683940763 | 6.410526678 | 8.570921008 | 4.41E-16    | 3.97E-14    |
| NDC80      | 0.684023054 | 2.703547527 | 8.184641687 | 6.51E-15    | 4.68E-13    |
| NEK2       | 0.685108075 | 2.622839042 | 8.403103168 | 1.43E-15    | 1.18E-13    |
| RPL22L1    | 0.687975353 | 4.002876336 | 6.034420569 | 4.40E-09    | 1.03E-07    |
| SLPI       | 0.68887482  | 8.938989768 | 3.212251477 | 0.001450667 | 0.009684264 |
| ORC1       | 0.689084241 | 2.341206715 | 9.128795626 | 7.95E-18    | 9.94E-16    |
| KIF2C      | 0.689719562 | 3.593821381 | 8.647956675 | 2.56E-16    | 2.42E-14    |
| SNRPF      | 0.690076344 | 4.01453942  | 9.937785426 | 1.83E-20    | 3.88E-18    |

|            |             |             |             |             |             |
|------------|-------------|-------------|-------------|-------------|-------------|
| RRM2       | 0.691592715 | 4.173454781 | 8.086417808 | 1.27E-14    | 8.63E-13    |
| MAL2       | 0.691661909 | 6.18232288  | 5.074938321 | 6.58E-07    | 1.01E-05    |
| TROAP      | 0.691727664 | 2.504277033 | 8.980055654 | 2.35E-17    | 2.65E-15    |
| UBE2S      | 0.692507704 | 3.789477862 | 7.317955395 | 2.04E-12    | 8.65E-11    |
| PTTG1      | 0.693578773 | 4.702466873 | 7.637067234 | 2.58E-13    | 1.32E-11    |
| CDC25A     | 0.696141352 | 1.78180736  | 10.9510313  | 6.37E-24    | 2.66E-21    |
| RAD51      | 0.69637006  | 2.497129055 | 10.3731701  | 6.26E-22    | 1.74E-19    |
| CDC45      | 0.699391991 | 3.009026845 | 7.851700094 | 6.22E-14    | 3.61E-12    |
| PLK1       | 0.699636419 | 3.636747275 | 8.882415078 | 4.77E-17    | 5.12E-15    |
| TPX2       | 0.701387113 | 4.851099046 | 7.849605943 | 6.31E-14    | 3.65E-12    |
| RFC4       | 0.701623478 | 3.226748928 | 7.477007262 | 7.33E-13    | 3.41E-11    |
| NPM3       | 0.70350504  | 5.08359689  | 7.565189438 | 4.13E-13    | 2.04E-11    |
| CHAF1A     | 0.705781418 | 3.15087221  | 9.585231238 | 2.67E-19    | 4.39E-17    |
| HSPE1      | 0.706867433 | 5.213643494 | 8.517278477 | 6.44E-16    | 5.61E-14    |
| S100A2     | 0.707944671 | 9.923603231 | 5.028528809 | 8.24E-07    | 1.24E-05    |
| MCM2       | 0.708127871 | 4.313967508 | 6.916626405 | 2.52E-11    | 8.86E-10    |
| CCNA2      | 0.708223308 | 3.822452137 | 8.554280396 | 4.96E-16    | 4.41E-14    |
| MELK       | 0.712321973 | 3.378603702 | 7.959139692 | 3.02E-14    | 1.88E-12    |
| HMGA1      | 0.71622939  | 7.21586477  | 8.141680033 | 8.74E-15    | 6.13E-13    |
| RNASEH2A   | 0.719019353 | 4.194602572 | 8.669234192 | 2.20E-16    | 2.11E-14    |
| NUSAP1     | 0.724251646 | 4.053476713 | 7.725725158 | 1.44E-13    | 7.66E-12    |
| KRTCAP3    | 0.72455622  | 3.086390764 | 3.812001139 | 0.000165275 | 0.001454059 |
| ZWINT      | 0.727302559 | 4.035494745 | 9.074834918 | 1.18E-17    | 1.45E-15    |
| RPE65      | 0.727597223 | 0.97001266  | 5.750655919 | 2.07E-08    | 4.28E-07    |
| TMEM97     | 0.7279449   | 2.910692651 | 7.813568197 | 8.02E-14    | 4.52E-12    |
| AKR1C1     | 0.728662183 | 2.520462053 | 3.07221802  | 0.002306809 | 0.014401011 |
| KIFC1      | 0.733280133 | 3.711250045 | 9.295031695 | 2.33E-18    | 3.18E-16    |
| MCM7       | 0.733728864 | 5.242705026 | 8.075051981 | 1.38E-14    | 9.26E-13    |
| PSAT1      | 0.734848835 | 4.18991131  | 6.6372755   | 1.36E-10    | 4.18E-09    |
| MYBL2      | 0.736856293 | 4.822692222 | 7.933206954 | 3.60E-14    | 2.21E-12    |
| H2AFZ      | 0.742733263 | 6.379367547 | 10.10111443 | 5.21E-21    | 1.22E-18    |
| PKMYT1     | 0.742738176 | 2.971907631 | 9.30062347  | 2.24E-18    | 3.06E-16    |
| HMGB2      | 0.742821976 | 5.027542168 | 7.693878082 | 1.77E-13    | 9.32E-12    |
| GMNN       | 0.744257931 | 3.174969502 | 10.36611608 | 6.61E-22    | 1.81E-19    |
| TGM1       | 0.750609936 | 5.403878134 | 3.015018964 | 0.002774772 | 0.016845011 |
| CDCA5      | 0.752754269 | 3.633795235 | 9.302036683 | 2.22E-18    | 3.04E-16    |
| ASF1B      | 0.756624945 | 3.688526777 | 8.460342248 | 9.60E-16    | 8.15E-14    |
| VPS9D1-AS1 | 0.758959846 | 2.454168874 | 7.162783031 | 5.45E-12    | 2.16E-10    |
| CDC6       | 0.76495289  | 2.754147909 | 9.895017233 | 2.54E-20    | 5.22E-18    |
| CSTA       | 0.769571855 | 7.92005225  | 3.925654286 | 0.000105896 | 0.00097964  |
| CXCL17     | 0.770319267 | 3.202322328 | 3.310949535 | 0.001035812 | 0.007237027 |
| S100A14    | 0.774734356 | 8.535483097 | 5.531133396 | 6.61E-08    | 1.24E-06    |
| SNORD104   | 0.779104478 | 2.893777788 | 4.595931363 | 6.20E-06    | 7.70E-05    |
| CDK1       | 0.782692105 | 3.642360721 | 10.08146164 | 6.06E-21    | 1.38E-18    |
| C19orf48   | 0.78272427  | 4.24790401  | 9.163558906 | 6.16E-18    | 7.80E-16    |
| SPC24      | 0.784868066 | 2.406770052 | 9.000557133 | 2.03E-17    | 2.33E-15    |
| CCNB2      | 0.788037738 | 3.738125544 | 10.21246492 | 2.19E-21    | 5.41E-19    |
| PCLAF      | 0.790744973 | 2.905124315 | 10.23596244 | 1.83E-21    | 4.55E-19    |
| CKS1B      | 0.794759963 | 3.917786329 | 9.524090046 | 4.23E-19    | 6.69E-17    |
| BIRC5      | 0.796111534 | 4.159141522 | 9.265173077 | 2.91E-18    | 3.91E-16    |
| SAPCD2     | 0.801703005 | 2.633206165 | 7.0010304   | 1.49E-11    | 5.42E-10    |
| CLDN7      | 0.808826156 | 4.123011571 | 4.721896159 | 3.50E-06    | 4.59E-05    |
| GIN52      | 0.815405184 | 2.705263787 | 9.750665911 | 7.65E-20    | 1.43E-17    |

|            |             |             |             |             |             |
|------------|-------------|-------------|-------------|-------------|-------------|
| UBE2C      | 0.823725467 | 5.233095892 | 8.945231192 | 3.03E-17    | 3.34E-15    |
| CBLC       | 0.827093143 | 4.744244536 | 7.76113243  | 1.14E-13    | 6.23E-12    |
| CENPW      | 0.83426716  | 4.677031715 | 8.40132425  | 1.45E-15    | 1.19E-13    |
| UBE2T      | 0.839720376 | 3.84796213  | 9.054971336 | 1.36E-17    | 1.65E-15    |
| SERPINB2   | 0.857723607 | 3.845454388 | 3.801791983 | 0.000171928 | 0.00150433  |
| CDCA7      | 0.859502462 | 2.623460476 | 8.430551285 | 1.18E-15    | 9.85E-14    |
| CDT1       | 0.860477476 | 3.2451728   | 10.37385291 | 6.23E-22    | 1.74E-19    |
| S100P      | 0.868700118 | 4.203663298 | 3.624549959 | 0.000336506 | 0.002704479 |
| AURKB      | 0.870046617 | 3.786244838 | 9.257976575 | 3.07E-18    | 4.10E-16    |
| NMU        | 0.871496103 | 2.709591007 | 5.741407628 | 2.18E-08    | 4.47E-07    |
| PBK        | 0.872040991 | 2.816216896 | 9.557401433 | 3.30E-19    | 5.36E-17    |
| KRT18      | 0.877413502 | 5.364261171 | 5.949332612 | 7.05E-09    | 1.59E-07    |
| AL138789.1 | 0.880278832 | 1.256049748 | 5.93617795  | 7.57E-09    | 1.70E-07    |
| CCNB1      | 0.880709206 | 4.880925141 | 10.88058962 | 1.12E-23    | 4.48E-21    |
| CDC20      | 0.889420294 | 5.415713296 | 10.17024594 | 3.05E-21    | 7.35E-19    |
| SPRR2F     | 0.890456374 | 3.782170865 | 2.78815581  | 0.005617318 | 0.030599692 |
| SPRR2A     | 0.902381649 | 8.051853906 | 2.736677987 | 0.006552273 | 0.034767294 |
| EPCAM      | 0.917013712 | 3.481726258 | 5.136686567 | 4.86E-07    | 7.67E-06    |
| CKS2       | 0.919790021 | 5.776434797 | 9.609538907 | 2.23E-19    | 3.73E-17    |
| LGALS7     | 0.96795531  | 3.884464481 | 2.739461547 | 0.006498326 | 0.034551444 |
| KRT24      | 0.976229487 | 1.340832748 | 4.241537932 | 2.91E-05    | 0.000308663 |
| KRT8       | 1.018572826 | 4.286153805 | 3.932219396 | 0.000103175 | 0.000957774 |
| AC006329.1 | 1.109263029 | 2.484680361 | 10.50322303 | 2.25E-22    | 6.73E-20    |
| ALDH3A1    | 1.176395333 | 3.611693377 | 4.449326135 | 1.19E-05    | 0.000138767 |
| FGFBP1     | 1.290538154 | 7.417448232 | 6.746294923 | 7.09E-11    | 2.28E-09    |

**B**

21.07080618  
18.22808294  
22.7575138  
20.93459787  
18.47007606  
22.34848915  
22.2625913  
22.83734372  
19.40036598  
20.22100304  
44.79207826  
41.42026775  
20.21054554  
44.90041241  
39.97859899  
18.27776225  
16.20061757  
47.73814537  
35.44022755  
15.69774299  
46.08953055  
19.87578938  
24.75180541  
17.56280702  
15.60589326  
23.32479508  
17.19776312  
42.13157776  
20.33476831  
20.77763258  
28.5815706  
45.30287818  
20.40051126  
23.71388382  
22.89857939  
35.56673788  
50.07427141  
20.68163655  
57.11498905  
53.56360395  
19.85004794  
19.87135316  
41.97579948  
45.93643357  
46.06372329  
40.28359851  
26.90828681  
47.78970924  
53.63879479  
45.50103623  
18.18065024

32.12922161  
16.63703227  
26.29473258  
21.02071337  
28.99565724  
40.86014026  
50.02088966  
23.50106745  
32.6862893  
13.64738767  
23.537255  
10.90064905  
39.68462141  
18.30771109  
29.77272222  
27.48947364  
56.50511627  
18.31472878  
41.10499592  
35.5420675  
36.7421263  
42.54554568  
54.33880608  
46.04758402  
26.69352479  
44.97370472  
19.2369087  
18.49346382  
37.93876517  
38.02628664  
34.60369242  
69.44311992  
29.09197617  
28.6661031  
58.18272202  
22.16117117  
52.64611375  
22.44814866  
30.37837226  
21.99314457  
46.64308402  
25.54447722  
35.80608393  
33.42421115  
29.09411742  
35.3218877  
33.04496582  
47.61752144  
20.92194594  
39.37697697  
3.399455341  
29.78517754  
11.12064347

32.91029421  
45.18525968  
18.63318062  
19.73641691  
13.09530432  
43.33026638  
19.75772502  
38.10579801  
17.94438442  
42.10917798  
41.2433638  
12.33917141  
41.17639038  
32.2099627  
23.46934343  
5.398244575  
28.56029494  
33.06589204  
27.34565133  
35.26363388  
51.6666317  
27.27374707  
44.71734106  
24.23308355  
34.90911635  
1.567083081  
51.81184729  
26.78714069  
21.94341199  
62.77080228  
48.58321351  
22.2914608  
32.99061139  
17.13163148  
44.64166736  
5.400767081  
22.31382701  
35.20061145  
28.97379062  
44.37298477  
40.496801  
17.9877308  
41.42743602  
42.93429081  
59.50396546  
19.06059474  
22.37654075  
15.45845356  
21.67263671  
76.32110308  
29.9150714  
50.0634687  
23.07326294

18.04879996  
31.9780996  
46.20816675  
31.68107601  
39.9430778  
57.32815874  
33.09559683  
25.20361026  
17.68797107  
21.21743122  
34.03142834  
24.75586111  
32.21263282  
39.90286958  
34.9364346  
68.66454027  
24.5441358  
21.03427532  
45.07266225  
20.7790083  
21.08868199  
45.40661272  
27.9354963  
23.43087843  
29.7720092  
48.89359036  
22.64233494  
28.61909249  
31.74490636  
33.98722711  
10.96175986  
36.79156569  
52.79159853  
23.59394067  
19.41784747  
35.31166459  
23.70642098  
10.76830876  
14.14471727  
22.59624325  
28.53547654  
44.77063621  
49.55870503  
56.94284202  
21.56372774  
54.53238802  
21.79997097  
21.38466676  
26.54594537  
30.24474453  
38.57347523  
28.49595461  
17.77596208



50.86205064  
30.86292932  
28.38771098  
3.717724671  
23.68805073  
18.96402016  
32.87129114  
37.90875978  
21.96737681  
17.25198901  
38.36519912  
17.13533554  
23.39326682  
15.83935265  
35.52380402  
58.89548294  
47.11564326  
76.51594604  
43.21087237  
27.01388364  
26.91741772  
18.61689604  
29.62708461  
25.45153307  
28.7055446  
47.23730468  
38.50406813  
17.3816323  
15.85024137  
46.47472683  
32.85620058  
18.20293861  
22.80600254  
28.1232119  
50.06764877  
28.02992335  
49.9953446  
13.81621281  
31.87610962  
37.60710919  
24.06614016  
5.878060009  
49.06783399  
23.22026377  
3.81946595  
34.81648368  
8.970622937  
57.28523207  
2.076961933  
14.17389844  
44.68114127  
23.43227436  
23.212108

17.84599048  
39.57651037  
9.519676721  
8.08261075  
3.725085771  
6.852050874  
20.62102616  
3.32620347  
22.76946968  
7.030282677  
20.0588213  
37.40049099  
19.18310892  
39.63466377  
36.25739439  
15.61756257  
31.30965737  
12.65765701  
28.36119571  
19.98042457  
13.89673032  
46.50040468  
33.81923646  
15.11701282  
12.94745536  
28.97939453  
53.55722639  
11.83179997  
17.25748016  
18.37825048  
11.44179806  
22.21511694  
10.60411588  
19.26146876  
3.955213775  
27.16064384  
16.27586567  
37.14355757  
24.15239166  
10.08847878  
18.66673636  
30.3683498  
31.95985871  
51.8772704  
51.71494008  
11.8406935  
28.30664818  
23.7952693  
34.07927331  
41.60128794  
37.77155103  
6.749524662  
22.21868144

17.73005182  
42.71986477  
29.80429229  
18.44491122  
13.55329965  
22.0274144  
11.85758033  
10.5110241  
29.22090309  
14.43505862  
21.96632728  
24.09474429  
49.20715962  
60.81708991  
13.90946546  
27.71814209  
14.59628018  
21.88175141  
46.30334636  
49.49674662  
17.18095377  
19.81827378  
3.612605287  
32.87673285  
4.524264417  
45.54028242  
52.199149  
15.16209  
31.0913506  
49.27833309  
16.48576749  
15.09116308  
32.79347082  
27.30631059  
13.58539488  
36.0742847  
24.19884213  
29.72695837  
30.73395949  
40.49581325  
62.13705796  
29.05620202  
18.8385621  
31.66766261  
14.07795955  
25.40765053  
9.098356593  
19.52354317  
32.88529579  
52.62966549  
52.98840628  
20.59610028  
43.99186054

13.9002035  
21.67052488  
34.54031969  
16.04671174  
22.21748782  
11.14000245  
27.63596708  
-4.072131586  
16.13115006  
36.4649006  
1.692695596  
15.61717862  
22.07571848  
34.76011626  
52.19584456  
44.16812913  
28.12343768  
27.04634925  
18.14285293  
52.01688676  
0.965888873  
30.09530549  
18.49527101  
22.74387544  
11.2589028  
31.30817432  
13.34617165  
26.41501929  
46.29918252  
10.28655726  
-2.618478361  
9.778091417  
20.53083015  
45.42121953  
18.94751323  
54.3671535  
28.66498097  
72.53573977  
22.32097886  
3.219793124  
12.51624357  
25.33061122  
-1.4597317  
34.70992314  
29.71733623  
26.76695951  
18.08316782  
7.573603669  
21.46527344  
4.304945609  
18.10923559  
16.39808326  
20.10334093

43.47425391  
13.7684358  
6.418378245  
46.55241947  
7.800209376  
15.91089015  
20.72031946  
10.31896607  
20.10813492  
14.33700216  
17.27890009  
31.52995115  
29.92130646  
27.30580383  
13.77896942  
6.590599269  
15.7907076  
31.42994179  
28.89611583  
15.29900981  
13.23022407  
20.67080566  
9.512737387  
23.81096381  
20.92474535  
6.792556391  
21.95808247  
3.68525254  
26.33108789  
19.4143536  
30.54487202  
23.22443586  
10.04761914  
23.79688773  
14.92783639  
26.48224782  
11.57108057  
40.34195389  
35.34369285  
32.24479828  
14.20748686  
17.07131826  
39.79967076  
25.2406622  
15.725078  
35.28910293  
16.1197346  
24.15504606  
10.01022908  
3.459432661  
2.831623459  
5.310326836  
34.36467361

41.44287635  
26.28965151  
1.49004817  
17.57018015  
11.78562496  
24.22667545  
11.99170041  
5.226463972  
13.30794838  
49.40477541  
7.980324569  
18.56380838  
15.54169704  
17.23206674  
23.35511112  
24.45950634  
20.9942125  
52.27100454  
9.553666636  
67.13042797  
30.89680133  
38.70014547  
0.262944154  
50.0284248  
20.99890923  
11.47258329  
5.774720049  
38.37436922  
35.73905945  
31.19625906  
46.67179638  
15.82977483  
16.43355018  
26.96014445  
9.164321648  
24.58532837  
21.90062616  
26.20076506  
23.60383128  
34.18705017  
8.284161867  
36.9334298  
10.50280506  
5.090501706  
4.130395717  
16.30762352  
9.068090644  
16.35901652  
4.548405421  
1.56075466  
37.35038908  
1.821094478  
9.21223337

30.52885297  
18.65623565  
20.68330023  
6.339108635  
16.4764702  
10.20839365  
33.48544279  
25.44202721  
24.74289032  
28.95373955  
17.69680954  
20.32679697  
4.700333489  
58.65175446  
15.26109264  
8.982324359  
32.31134996  
14.56717002  
40.4333789  
17.57956357  
25.94173172  
12.87335541  
21.37792752  
20.89342423  
42.59687603  
2.187383052  
20.04741912  
34.12501514  
22.65284763  
15.29733967  
20.45644869  
53.35271718  
23.65442429  
7.746936321  
6.950895103  
20.14438767  
31.98246028  
12.71837575  
2.030329539  
20.42926552  
4.599231763  
47.24156304  
18.58350122  
9.983653886  
35.39519541  
16.15204876  
24.10448913  
14.60153217  
25.62323245  
27.60024608  
21.11067175  
12.58471693  
39.69079981

43.12771667  
-0.381662531  
40.92887756  
28.65057235  
5.463659146  
38.39202295  
22.03904111  
3.751547424  
3.097894319  
13.9192453  
18.38323022  
21.122374  
17.67994853  
49.65170246  
-0.024913046  
25.63543444  
10.22246754  
5.770368381  
12.42334226  
13.93826038  
24.65778703  
1.801248833  
3.964498799  
21.50039677  
21.40657851  
20.7303413  
25.69057308  
24.81451695  
7.297784018  
25.63527151  
-3.439210232  
4.065920964  
30.23402823  
43.31384162  
37.86279243  
10.25324316  
20.52116226  
30.56737707  
10.83260403  
-2.408641959  
11.55994716  
12.43904472  
3.570377277  
9.739424482  
17.4333609  
39.71221432  
23.17239264  
11.45200041  
13.39166712  
7.752017744  
40.93431671  
31.38527873  
27.66350686



24.37442531  
24.05144197  
5.698568011  
14.2294252  
7.18899072  
5.238728178  
9.498396133  
5.649985852  
11.08813317  
21.70180142  
14.92743116  
1.196072665  
5.285242385  
5.587454124  
37.42779895  
21.84198074  
12.96466091  
33.23723822  
2.06098561  
10.92654483  
9.617855905  
66.18806544  
27.27169111  
2.00496051  
13.07939613  
17.02199437  
0.0310329  
9.642762778  
51.16145671  
15.15150915  
10.85332897  
6.087777175  
27.47231426  
3.818935562  
21.89274366  
-4.169206833  
1.914685219  
7.655607947  
5.547598853  
17.20580151  
4.088557735  
22.5759641  
18.4828594  
6.233308129  
39.97455324  
40.29500989  
32.97372617  
29.76580597  
8.459110803  
7.796435634  
51.3850086  
-0.115809369  
1.493419406

1.614023762  
18.25134212  
1.778808449  
-1.596011295  
14.04028299  
3.193853257  
8.442225204  
15.45910306  
33.71206382  
-1.049796263  
-1.814130603  
26.28171834  
35.8639715  
1.328696127  
14.68750345  
22.67061649  
31.30945138  
-1.102102519  
17.21502214  
24.17443116  
19.64899672  
33.42264715  
5.314607187  
1.914035091  
0.750070185  
12.72993819  
7.154160337  
19.75146884  
17.6150611  
14.97996531  
4.150310318  
5.60799133  
-1.597356162  
11.29696977  
28.75516006  
33.19168444  
33.92426308  
6.996589356  
48.00494049  
10.85196123  
5.535626201  
-2.927329336  
1.301933167  
25.65432903  
3.674797768  
6.168689366  
17.20467573  
16.62928097  
20.04383701  
20.0625795  
21.90225231  
15.60916018  
7.666671581

12.81749152  
24.21107589  
1.181457047  
12.29426229  
8.648338804  
10.15288908  
-1.521599005  
10.27942315  
12.40191671  
1.782875765  
5.575023654  
15.92230669  
12.1205079  
12.67699558  
5.100663037  
24.99596322  
1.752234569  
16.79741454  
28.364697  
7.482167768  
-0.492563973  
12.95700786  
50.7377847  
11.28294059  
4.520198505  
2.719681052  
23.76696575  
6.91391878  
13.5207446  
6.597162203  
10.51529851  
22.02755778  
9.827900765  
16.31016602  
5.16175543  
8.738510242  
8.697620433  
12.85251501  
6.403515287  
45.56246605  
54.68660429  
11.68236112  
6.123769256  
18.85650538  
6.976905516  
36.56309738  
8.783164084  
56.40724164  
22.60116197  
11.41213035  
24.81203416  
10.36158866  
-1.187603903

1.173890833  
13.846612  
8.114419082  
18.43535917  
24.39095231  
18.26140908  
5.032415214  
1.170393565  
21.3518314  
30.65706982  
9.008201028  
29.94723296  
30.93255488  
2.527415645  
12.42074232  
13.28172263  
4.377098248  
5.315848455  
13.78900348  
19.26841007  
67.12430755  
21.10967564  
26.87218503  
38.39700761  
8.384307974  
20.41244079  
15.91681732  
15.73078489  
15.40303823  
0.976490721  
20.69027643  
47.11346801  
2.850009674  
41.64472841  
6.040560822  
12.15713937  
2.6224619  
7.973759139  
0.896073121  
7.873257486  
7.638375544  
20.91029634  
20.78476447  
25.11478504  
14.22064729  
19.08760298  
12.14075302  
32.96708868  
26.93833299  
24.54370573  
1.856900161  
20.37969004  
6.22888915

-0.439250112  
-4.338740387  
24.95038572  
28.35994115  
22.01660548  
-2.538710625  
8.299647668  
20.86276767  
10.36140526  
10.50188286  
9.008420407  
24.66377345  
29.90456556  
12.42977452  
19.70998788  
25.8229884  
26.65886597  
24.91021607  
26.30762828  
23.77794759  
32.40198393  
19.1738958  
12.10003956  
0.980646869  
20.30118909  
1.907450175  
22.42304771  
-4.342893947  
19.60821852  
17.79824618  
8.431168734  
14.54168592  
28.16566401  
28.62729492  
25.654695  
19.59168696  
36.21130597  
22.28932957  
24.59757268  
11.16773796  
40.49345344  
29.04008347  
-1.219066709  
24.30169041  
15.61663481  
11.21488235  
19.80882237  
6.724262103  
19.57975017  
33.74819772  
4.064667923  
24.31156254  
12.66692065

17.30821387  
29.63744601  
16.39719674  
26.70068676  
-0.732712257  
35.62542356  
-4.339693237  
36.50820286  
-0.765986322  
19.22855077  
16.52281263  
12.2786009  
27.61059152  
25.55247176  
10.9940589  
-1.485734742  
19.95206104  
35.02040372  
25.96757062  
32.27433608  
11.20571215  
28.89654025  
9.147747912  
22.86062308  
22.89767321  
34.56143227  
36.49419028  
17.32817904  
15.08106962  
15.32134363  
14.68848351  
17.92149452  
12.88447915  
19.20640154  
22.74179772  
2.280185766  
4.873439593  
16.18088334  
27.8403861  
-4.12352743  
-2.769380291  
16.17426075  
28.5496968  
14.55954018  
27.05263785  
25.41688497  
22.7605035  
24.25321074  
9.579339438  
-2.598850897  
29.38638024  
25.95589319  
35.39658607

22.09772047  
4.716299  
28.31330404  
17.10121566  
19.13434453  
43.29257067  
38.74310832  
20.53551224  
27.61460713  
20.52171348  
18.1069508  
18.67109964  
32.7425214  
25.04334016  
4.498945734  
14.63298627  
25.30084897  
21.24677698  
22.46996548  
26.10529749  
19.70989854  
-0.569075077  
28.99587941  
8.069468132  
20.284645  
-3.026131029  
30.59786042  
22.02136791  
12.97586863  
21.0745039  
36.64335135  
30.63883114  
19.50262605  
38.68831096  
-3.195498664  
30.64918793  
24.64847813  
16.13491678  
35.07188276  
-0.148591383  
-2.286976672  
6.942052749  
2.555930622  
36.49277335  
29.63867274  
28.46058916  
37.49934818  
37.68059398  
32.28759336  
30.37932742  
15.1436431  
3.10606787  
33.98147291

28.06358107  
19.94103042  
24.24095373  
28.85247525  
-0.606294529  
24.44254209  
38.74841355  
-1.237872952  
30.32671735  
8.021248534  
32.53525002  
9.120473156  
9.049997225  
42.73180903  
37.17422869  
-3.837522032  
-3.976555668  
5.008120755  
32.92383331  
-3.969100902  
1.078630291  
-0.123959256  
39.75667877  
1.932095924  
13.61648103
